# Supplementary material for: Comparative Metagenome-Assembled Genome Analysis of “Candidatus Lachnocurva vaginae”, Formerly Known as Bacterial Vaginosis-Associated Bacterium−1 (BVAB1)
Source: PubMed Central journal article supplement (PMC7136613; doi:10.3389/fcimb.2020.00117), 2020-03-31

Genomic Island  
Phage  
rRNA Operon

"Ca. Lachnocurva vaginae"  
cMAG

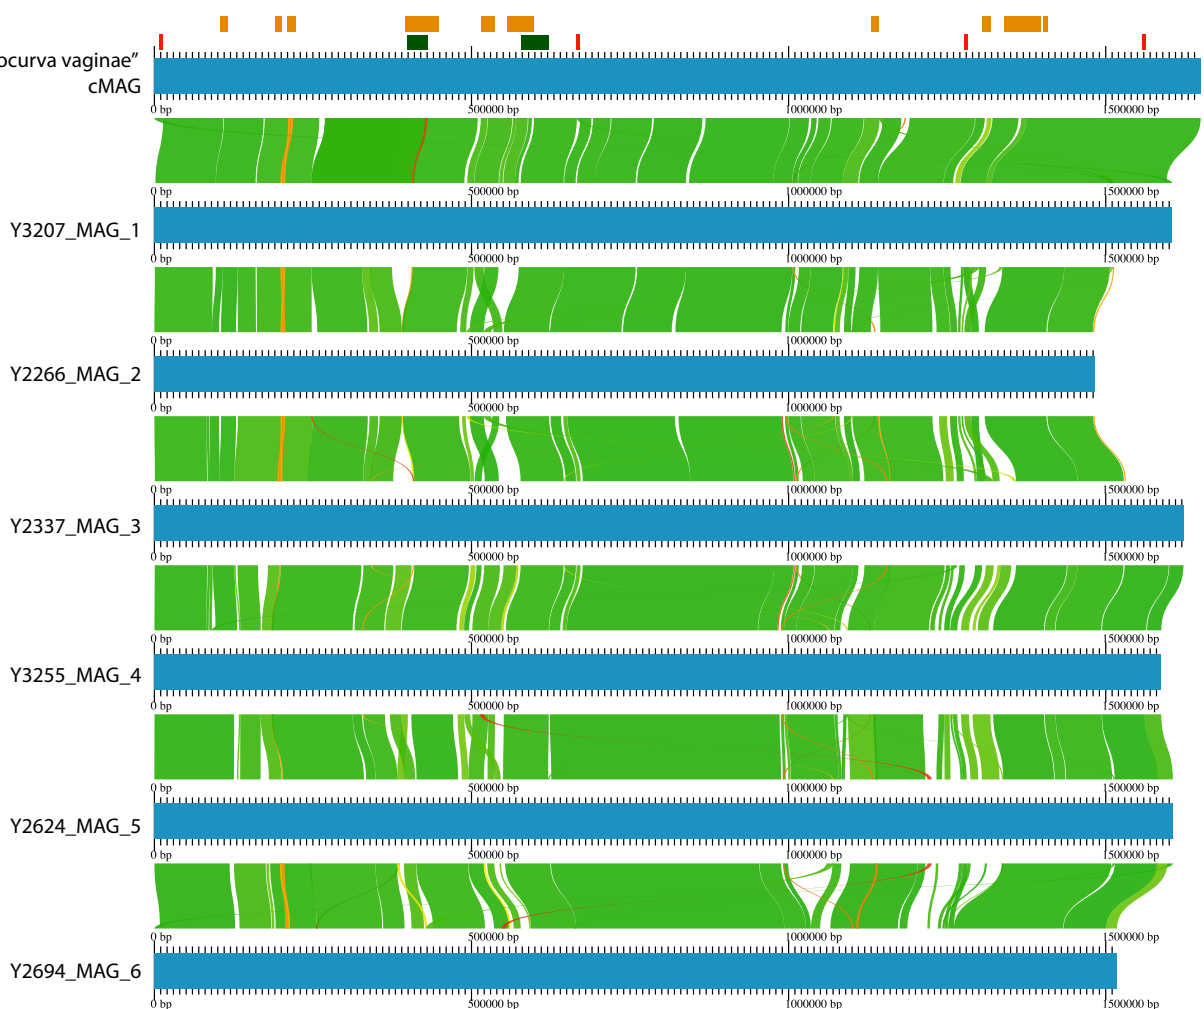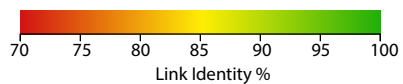

Supplement: Image_1.pdf [file Image_1.pdf]
