# Supplementary material for: Comparative Metagenome-Assembled Genome Analysis of “Candidatus Lachnocurva vaginae”, Formerly Known as Bacterial Vaginosis-Associated Bacterium−1 (BVAB1)
Source: PubMed Central journal article supplement (PMC7136613; doi:10.3389/fcimb.2020.00117), 2020-03-31
Supplement: Image_2.pdf [file Image_2.pdf]

- Ring 1: Base position
- Ring 2: GC Content
- Ring 3: GC Skew(+ / -)
- Ring 4: Best Blast hit if match to close relatives > 80% ID
  - Shuttleworthia satelles*
  - Lachnobacterium bovis*
  - Mageeibacillus indolicus*
  - Lachnospiraceae* bacterium 2\_1\_46FAA
  - Clostridiales* bacterium KA00274
- Ring 5: Best Blast hit if match to *Clostridiales* > 80% ID
  - Clostridiales*, > 80% ID
  - Clostridiales*, > 60% ID
  - Clostridiales*, > 40% ID
  - Not *Clostridiales*, > 80% ID
  - Not *Clostridiales*, > 60% ID
  - Not *Clostridiales*, > 40% ID
- Ring 6: ■ Phage  
■ rRNA Operon
- Ring 7: ■ Genomic Island

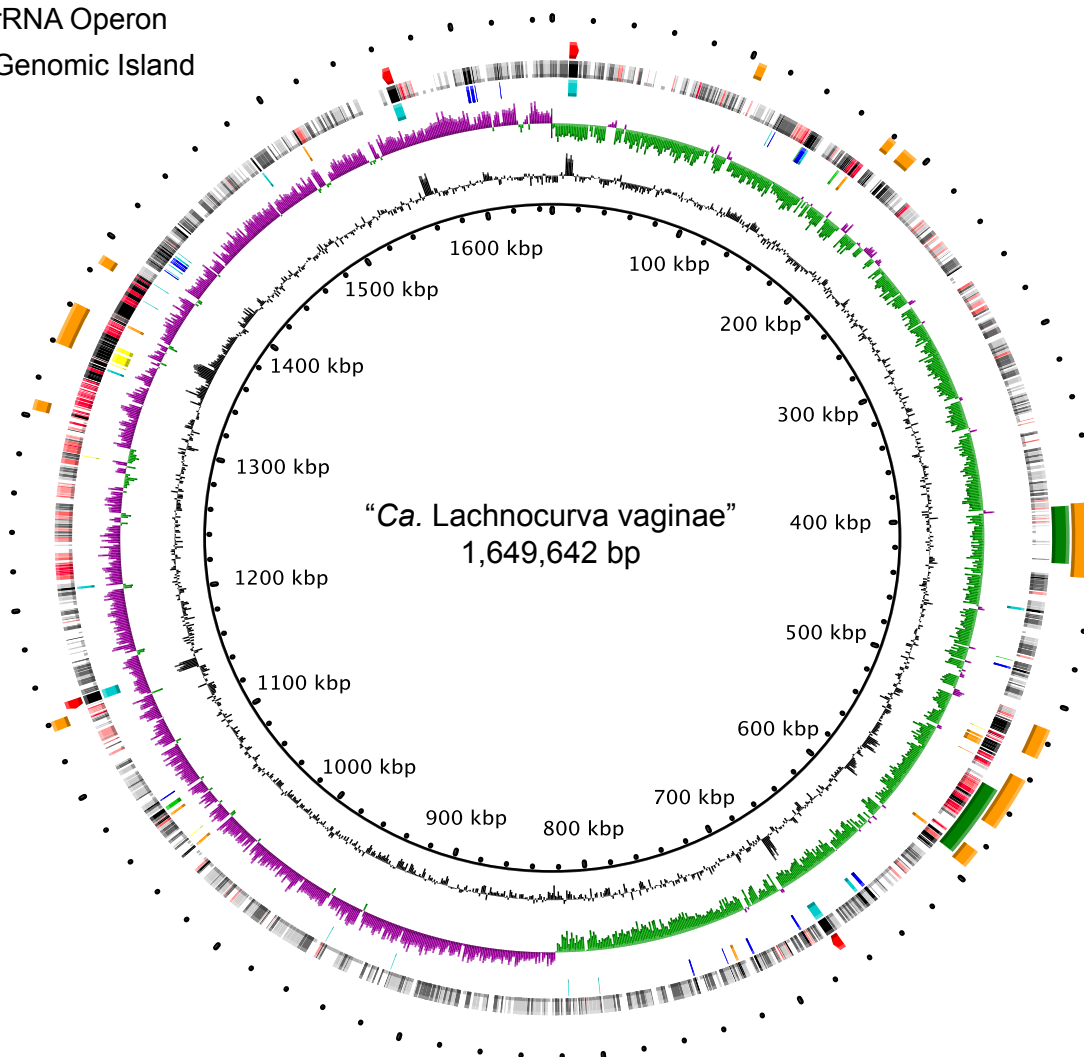

**Supplemental Figure 2.** Circle plot of “*Ca. Lachnocurva vaginae*” cMAG with best blast hits indicated as either *Clostridiales* or not (Ring 5). If hit is within *Clostridiales* and >80% ID, specific taxon of close relatives is indicated in Ring 4. Included BLAST hits covered at least 80% of the query gene.
