# Supplementary material for: Comparative Metagenome-Assembled Genome Analysis of “Candidatus Lachnocurva vaginae”, Formerly Known as Bacterial Vaginosis-Associated Bacterium−1 (BVAB1)
Source: Front Cell Infect Microbiol. 2020 Mar 31;10:117. doi: 10.3389/fcimb.2020.00117 (PMC7136613; doi:10.3389/fcimb.2020.00117)
Supplement: Supplemental Table 2 — List of marker genes used in Family-level CheckM analysis and presence (1) or absence (0) in the “Ca. Lachnocurva vaginae” cMAG. [file Table_2.xlsx]

## Sheet: Supplemental_Table_2
Supplemental Table 2. List of marker genes used in Family-level CheckM analysis and presence (1) or absence (0) in the "Ca. Lachnocurva vaginae" cMAG
Marker lineage: Lachnospiraceae	LCVA
TIGR03150	0
TIGR00336	0
TIGR01948	0
TIGR01947	0
TIGR00639	0
PF04204.11	0
PF02545.9	0
PF01071.14	0
TIGR00978	0
TIGR01162	0
PF13603.1	0
PF02844.10	0
PF13507.1	0
TIGR00044	0
PF09148.5	0
PF01808.13	0
TIGR01830	0
PF09186.6	0
TIGR00513	0
TIGR00515	0
PF02843.11	0
TIGR01943	0
PF01197.13	1
PF04297.9	1
PF00410.14	1
TIGR00755	1
PF00166.16	1
PF06969.11	1
PF01632.14	1
TIGR03426	1
PF09285.6	1
PF01430.14	1
PF02603.11	1
PF13932.1	1
PF01628.16	1
PF00861.17	1
PF00281.14	1
PF01668.13	1
PF00164.20	1
TIGR01446	1
TIGR00233	1
PF06574.7	1
PF01281.14	1
PF00416.17	1
TIGR00539	1
TIGR00536	1
PF00673.16	1
PF00466.15	1
PF00831.18	1
TIGR01575	1
PF01509.13	1
PF00162.14	1
TIGR00967	1
PF02403.17	1
PF00327.15	1
PF07499.8	1
PF00707.17	1
PF06838.6	1
PF01132.15	1
PF00298.14	1
PF01018.17	1
PF00252.13	1
PF01765.14	1
PF00237.14	1
PF00889.14	1
PF01121.15	1
PF04998.12	1
PF01409.15	1
PF00453.13	1
TIGR02785	1
PF01596.12	1
PF06071.8	1
PF01715.12	1
TIGR01091	1
PF05670.8	1
PF03461.10	1
TIGR00611	1
TIGR03594	1
PF08436.7	1
TIGR03596	1
TIGR03598	1
TIGR00855	1
TIGR00244	1
TIGR00329	1
PF02873.11	1
PF03484.10	1
TIGR01133	1
PF05190.13	1
PF08529.6	1
TIGR00690	1
TIGR00691	1
PF00828.14	1
PF03725.10	1
TIGR00392	1
PF04983.13	1
PF03602.10	1
PF00684.14	1
TIGR00010	1
TIGR00011	1
TIGR03263	1
PF01513.16	1
PF00886.14	1
TIGR00234	1
PF04565.11	1
PF01016.14	1
PF02631.11	1
TIGR00154	1
PF01985.16	1
PF10396.4	1
PF11967.3	1
PF04296.8	1
TIGR00422	1
PF08206.6	1
PF08676.6	1
PF02367.12	1
PF10397.4	1
PF00118.19	1
TIGR00628	1
PF02580.11	1
PF12627.2	1
PF01248.21	1
TIGR00019	1
PF07479.9	1
PF05833.6	1
PF01165.15	1
PF01119.14	1
PF00276.15	1
PF00338.17	1
PF02130.12	1
TIGR01203	1
PF02565.10	1
TIGR00064	1
TIGR00389	1
TIGR02482	1
TIGR01394	1
PF04560.15	1
PF01264.16	1
PF12392.3	1
TIGR01259	1
PF02601.10	1
PF04079.11	1
PF02650.9	1
TIGR00436	1
TIGR00633	1
TIGR00634	1
PF01643.12	1
PF02482.14	1
PF13742.1	1
PF04551.9	1
TIGR00737	1
PF00181.18	1
PF02457.11	1
PF08207.7	1
PF07549.9	1
PF10385.4	1
PF01196.14	1
PF13184.1	1
TIGR00482	1
PF00312.17	1
PF12631.2	1
PF04561.9	1
PF00177.16	1
TIGR02651	1
PF03481.8	1
PF13509.1	1
PF12344.3	1
PF04085.9	1
PF09371.5	1
PF13735.1	1
TIGR00648	1
PF01255.14	1
PF04816.7	1
PF03147.9	1
PF02132.10	1
PF02576.12	1
TIGR01087	1
PF01782.13	1
PF02410.10	1
PF04997.7	1
TIGR00928	1
TIGR02432	1
PF10458.4	1
PF00687.16	1
PF05636.6	1
PF01256.12	1
PF09269.6	1
PF01649.13	1
PF04563.10	1
PF03948.9	1
PF00183.13	1
TIGR00963	1
PF00347.18	1
PF05000.12	1
PF03947.13	1
PF00380.14	1
PF01424.17	1
PF00297.17	1
TIGR00042	1
PF00163.14	1
PF02390.12	1
PF12072.3	1
PF05191.9	1
TIGR01128	1
PF04468.7	1
PF01210.18	1
TIGR02075	1
TIGR00416	1
TIGR00185	1
TIGR00658	1
PF01134.17	1
TIGR00182	1
TIGR01574	1
TIGR01125	1
TIGR03599	1
TIGR00717	1
PF06421.7	1
TIGR00201	1
TIGR00499	1
PF04472.7	1
TIGR00360	1
PF05697.8	1
PF01084.15	1
PF02616.9	1
TIGR01378	1
PF02739.11	1
PF00366.15	1
PF02224.13	1
PF01728.14	1
PF00773.14	1
PF01138.16	1
PF02670.11	1
TIGR00054	1
PF01245.15	1
TIGR00057	1
PF03840.9	1
TIGR03346	1
PF00411.14	1
PF00572.13	1
PF06135.7	1
TIGR00113	1
TIGR00663	1
PF05188.12	1
TIGR00595	1
PF11987.3	1
PF01406.14	1
PF01702.13	1
PF01250.12	1
TIGR01079	1
PF00238.14	1
TIGR03725	1
PF03950.13	1
TIGR00195	1
TIGR00460	1
PF03726.9	1
PF03652.10	1
TIGR00464	1
PF03946.9	1
PF06325.8	1
PF08459.6	1
PF02527.10	1
PF00203.16	1
PF03668.10	1
TIGR03723	1
TIGR01063	1
PF02590.12	1
PF03719.10	1
PF07949.7	1
PF00584.15	1
TIGR01069	1
PF01330.16	1
PF02401.13	1
TIGR01033	1
PF00318.15	1
PF01743.15	1
PF02542.11	1
PF00825.13	1
PF05491.8	1
PF01746.16	1
PF02978.14	1
PF02912.13	1
TIGR00020	1
TIGR00922	1
PF00623.15	1
PF02033.13	1
PF02609.11	1
TIGR00225	1
TIGR01828	1
PF00573.17	1
TIGR02168	1
PF01195.14	1
TIGR01510	1
PF09397.5	1
TIGR00342	1
PF00189.15	1
TIGR00344	1
TIGR00096	1
PF13288.1	1
TIGR00442	1
TIGR00503	1
TIGR01051	1
PF01205.14	1
PF05198.11	1
PF01176.14	1
TIGR01351	1
PF00829.16	1
PF00333.15	1
PF02575.11	1
TIGR02191	1
TIGR01356	1
TIGR01357	1
PF01367.15	1
PF00215.19	1
