# Supplementary material for: Comparative Metagenome-Assembled Genome Analysis of “Candidatus Lachnocurva vaginae”, Formerly Known as Bacterial Vaginosis-Associated Bacterium−1 (BVAB1)
Source: Front Cell Infect Microbiol. 2020 Mar 31;10:117. doi: 10.3389/fcimb.2020.00117 (PMC7136613; doi:10.3389/fcimb.2020.00117)
Supplement: Supplemental Table 3 — Top 3 best BLAST matches to the genes of the “Ca. Lachnocurva vaginae” cMAG. [file Table_3.xlsx]

## Sheet: Supplemental_Table_3
Supplemental Table 3. Top 3 best BLAST matches to genes of the “Ca. Lachnocurva vaginae” cMAG.
Loci_Name	LCVA_No	Subject_GI	Query_Length	Subject_Length	Alignment_Length	e.value	PID	Subject_Taxon
LCVA_1	1	WP_006906607.1	446	456	459	0	61.874	Shuttleworthia_satelles
LCVA_1	1	EEP28063.1	446	456	459	0	61.874	Shuttleworthia_satelles
LCVA_1	1	WP_074718928.1	446	451	458	0	61.354	Lachnobacterium_bovis
LCVA_2	2	WP_006906608.1	367	368	367	7.94e-160	60.763	Shuttleworthia_satelles
LCVA_2	2	EEP28064.1	367	368	367	7.94e-160	60.763	Shuttleworthia_satelles
LCVA_2	2	EGG81885.1	367	369	367	2.11e-158	60.218	Lachnospiraceae_bacterium_2_1_46FAA
LCVA_3	3	EGG81886.1	72	69	71	3.41e-22	59.155	Lachnospiraceae_bacterium_2_1_46FAA
LCVA_3	3	WP_006906609.1	72	71	71	3.22e-22	53.521	Shuttleworthia_satelles
LCVA_3	3	EEP28065.1	72	71	71	3.22e-22	53.521	Shuttleworthia_satelles
LCVA_4	4	WP_074718922.1	363	370	357	2.71e-153	58.263	Lachnobacterium_bovis
LCVA_4	4	SDY71831.1	363	370	357	2.71e-153	58.263	Lachnobacterium_bovis_DSM_14045
LCVA_4	4	EGG81887.1	363	361	357	1.59e-153	57.423	Lachnospiraceae_bacterium_2_1_46FAA
LCVA_5	5	EGG81888.1	640	638	635	0	77.008	Lachnospiraceae_bacterium_2_1_46FAA
LCVA_5	5	WP_074718920.1	640	644	644	0	76.553	Lachnobacterium_bovis
LCVA_5	5	SDY71800.1	640	644	644	0	76.553	Lachnobacterium_bovis_DSM_14045
LCVA_6	6	WP_074718918.1	814	825	814	0	70.885	Lachnobacterium_bovis
LCVA_6	6	SDY71769.1	814	825	814	0	70.885	Lachnobacterium_bovis_DSM_14045
LCVA_6	6	EGG81889.1	814	826	812	0	70.443	Lachnospiraceae_bacterium_2_1_46FAA
LCVA_13	13	WP_074715866.1	405	407	391	0	71.867	Lachnobacterium_bovis
LCVA_13	13	SDX99802.1	405	407	391	0	71.867	Lachnobacterium_bovis_DSM_14045
LCVA_13	13	EGG83044.1	405	407	404	0	71.535	Lachnospiraceae_bacterium_2_1_46FAA
LCVA_14	14	WP_074718675.1	177	177	150	2.22e-50	51.333	Lachnobacterium_bovis
LCVA_14	14	SDY65145.1	177	185	150	1.71e-50	51.333	Lachnobacterium_bovis_DSM_14045
LCVA_14	14	gi|690790356|gb|KGF36818.1|	177	179	173	4.5e-47	47.399	Peptoniphilus lacrimalis DNF00528
LCVA_16	16	WP_074718185.1	658	660	658	0	67.021	Lachnobacterium_bovis
LCVA_16	16	SDY53799.1	658	660	658	0	67.021	Lachnobacterium_bovis_DSM_14045
LCVA_16	16	EEP29495.1	658	657	657	0	65.297	Shuttleworthia_satelles
LCVA_17	17	WP_074715874.1	258	260	254	1.19e-101	53.937	Lachnobacterium_bovis
LCVA_17	17	SDX99940.1	258	260	254	1.19e-101	53.937	Lachnobacterium_bovis_DSM_14045
LCVA_17	17	EEP29493.1	258	282	273	3.73e-97	48.718	Shuttleworthia_satelles
LCVA_18	18	WP_074718163.1	289	291	281	1.67e-92	49.822	Lachnobacterium_bovis
LCVA_18	18	SDY53446.1	289	291	281	1.67e-92	49.822	Lachnobacterium_bovis_DSM_14045
LCVA_18	18	EEP29492.1	289	290	288	2.71e-88	45.833	Shuttleworthia_satelles
LCVA_19	19	WP_074718159.1	539	538	525	3.99e-100	35.81	Lachnobacterium_bovis
LCVA_19	19	SDY53386.1	539	538	525	3.99e-100	35.81	Lachnobacterium_bovis_DSM_14045
LCVA_19	19	WP_074716943.1	539	472	308	3.22e-39	33.117	Lachnobacterium_bovis
LCVA_20	20	WP_074718149.1	179	185	178	1.99e-38	39.888	Lachnobacterium_bovis
LCVA_20	20	SDY53226.1	179	185	178	1.99e-38	39.888	Lachnobacterium_bovis_DSM_14045
LCVA_20	20	gi|985329335|gb|KXA13037.1|	179	312	173	2.56e-26	35.26	Clostridium perfringens
LCVA_21	21	EGG81783.1	148	155	146	8.96e-72	64.384	Lachnospiraceae_bacterium_2_1_46FAA
LCVA_21	21	WP_006905875.1	148	154	145	4.95e-66	62.069	Shuttleworthia_satelles
LCVA_21	21	EEP29487.1	148	154	145	4.95e-66	62.069	Shuttleworthia_satelles
LCVA_22	22	WP_074717911.1	329	333	327	1.35e-138	56.881	Lachnobacterium_bovis
LCVA_22	22	SDY46272.1	329	333	327	1.35e-138	56.881	Lachnobacterium_bovis_DSM_14045
LCVA_23	23	WP_006906812.1	139	142	137	2.1e-65	66.423	Shuttleworthia_satelles
LCVA_23	23	EEP27822.1	139	142	137	2.1e-65	66.423	Shuttleworthia_satelles
LCVA_23	23	WP_074717909.1	139	141	138	1.9e-50	53.623	Lachnobacterium_bovis
LCVA_24	24	WP_045000890.1	352	354	348	8.93e-160	62.931	Shuttleworthia_satelles
LCVA_24	24	EGG81806.1	352	354	352	3.73e-155	58.807	Lachnospiraceae_bacterium_2_1_46FAA
LCVA_24	24	WP_074717904.1	352	355	352	3.22e-154	58.523	Lachnobacterium_bovis
LCVA_25	25	WP_006907167.1	525	525	523	0	66.348	Shuttleworthia_satelles
LCVA_25	25	EEP27496.1	525	525	523	0	66.348	Shuttleworthia_satelles
LCVA_25	25	gi|690772460|gb|KGF19988.1|	525	553	531	2.48e-104	38.606	Corynebacterium tuscaniense DNF00037
LCVA_26	26	EGG82445.1	357	343	284	4.08e-28	33.099	Lachnospiraceae_bacterium_2_1_46FAA
LCVA_27	27	WP_045001103.1	124	120	107	6.01e-32	46.729	Shuttleworthia_satelles
LCVA_27	27	WP_074717927.1	124	120	100	1.83e-34	46	Lachnobacterium_bovis
LCVA_27	27	SDY46014.1	124	122	100	1.92e-34	46	Lachnobacterium_bovis_DSM_14045
LCVA_28	28	WP_074717892.1	337	330	323	1.58e-140	59.752	Lachnobacterium_bovis
LCVA_28	28	SDY45947.1	337	330	323	1.58e-140	59.752	Lachnobacterium_bovis_DSM_14045
LCVA_28	28	EGG82437.1	337	321	316	4.23e-130	56.962	Lachnospiraceae_bacterium_2_1_46FAA
LCVA_29	29	WP_074717890.1	158	159	154	3.62e-61	62.987	Lachnobacterium_bovis
LCVA_29	29	SDY45920.1	158	159	154	3.62e-61	62.987	Lachnobacterium_bovis_DSM_14045
LCVA_29	29	EEP27811.1	158	160	156	3.41e-54	58.974	Shuttleworthia_satelles
LCVA_30	30	WP_006906799.1	651	648	645	0	71.628	Shuttleworthia_satelles
LCVA_30	30	EEP27809.1	651	648	645	0	71.628	Shuttleworthia_satelles
LCVA_30	30	gi|987347311|gb|KXB60251.1|	651	646	651	0	70.2	Lachnoanaerobaculum saburreum
LCVA_31	31	gi|985293905|gb|KWZ79029.1|	656	658	648	0	51.08	Anaerococcus tetradius
LCVA_31	31	gi|987343782|gb|KXB56953.1|	656	654	668	0	50.449	Lachnoanaerobaculum saburreum
LCVA_31	31	gi|1331365185|gb|PNH17025.1|	656	655	655	0	47.481	Lactobacillus iners
LCVA_32	32	gi|987343783|gb|KXB56954.1|	252	269	251	1.01e-139	74.104	Lachnoanaerobaculum saburreum
LCVA_32	32	gi|1331365186|gb|PNH17026.1|	252	251	251	1.94e-140	73.307	Lactobacillus iners
LCVA_32	32	gi|987345155|gb|KXB58224.1|	252	251	250	7.26e-135	72.4	Gemella asaccharolytica
LCVA_33	33	gi|326406303|gb|ADZ63374.1|	42	293	36	0.096	44.444	Lactococcus lactis subsp. lactis CV56
LCVA_33	33	gi|987356255|gb|KXB68848.1|	42	250	46	0.17	34.783	Peptoniphilus sp. DNF00840
LCVA_33	33	gi|985349088|gb|KXA31790.1|	42	250	46	0.15	34.783	Peptoniphilus harei
LCVA_34	34	gi|1331365187|gb|PNH17027.1|	301	305	296	6e-117	59.122	Lactobacillus iners
LCVA_34	34	gi|987343784|gb|KXB56955.1|	301	297	297	6.59e-114	56.229	Lachnoanaerobaculum saburreum
LCVA_34	34	gi|985293903|gb|KWZ79027.1|	301	301	296	3.31e-107	54.392	Anaerococcus tetradius
LCVA_35	35	gi|1331365191|gb|PNH17031.1|	221	222	221	2.75e-107	67.421	Lactobacillus iners
LCVA_35	35	gi|985293902|gb|KWZ79026.1|	221	225	222	2.84e-102	64.414	Anaerococcus tetradius
LCVA_35	35	gi|987343785|gb|KXB56956.1|	221	223	221	9.96e-102	63.348	Lachnoanaerobaculum saburreum
LCVA_36	36	gi|987347605|gb|KXB60530.1|	330	329	321	3.94e-113	53.583	Lachnoanaerobaculum saburreum
LCVA_36	36	WP_074716423.1	330	330	322	1.58e-114	50.311	Lachnobacterium_bovis
LCVA_36	36	SDY15122.1	330	330	322	1.58e-114	50.311	Lachnobacterium_bovis_DSM_14045
LCVA_37	37	gi|1446049385|gb|RDY20769.1|	559	576	550	7.07e-107	35.455	Criibacterium bergeronii
LCVA_37	37	WP_074715296.1	559	562	533	8.2e-55	26.079	Lachnobacterium_bovis
LCVA_37	37	SDX88174.1	559	562	533	8.2e-55	26.079	Lachnobacterium_bovis_DSM_14045
LCVA_38	38	gi|1446049384|gb|RDY20768.1|	570	539	530	6.14e-132	41.509	Criibacterium bergeronii
LCVA_38	38	gi|1446049566|gb|RDY20945.1|	570	559	562	1.29e-117	36.655	Criibacterium bergeronii
LCVA_39	39	gi|667704163|gb|KFA57098.1|	394	413	405	1.47e-172	57.037	Mageeibacillus indolicus
LCVA_39	39	gi|1331367028|gb|PNH18838.1|	394	392	384	2.22e-161	56.25	Mageeibacillus indolicus
LCVA_40	40	WP_006905100.1	141	140	139	1.43e-52	65.468	Shuttleworthia_satelles
LCVA_40	40	EEP28712.1	141	140	139	1.43e-52	65.468	Shuttleworthia_satelles
LCVA_40	40	gi|1331366776|gb|PNH18587.1|	141	140	140	1.9e-48	60	Lachnospiraceae bacterium
LCVA_41	41	WP_074716220.1	436	329	327	2.79e-117	53.517	Lachnobacterium_bovis
LCVA_41	41	SDY08395.1	436	329	327	2.79e-117	53.517	Lachnobacterium_bovis_DSM_14045
LCVA_41	41	gi|987350454|gb|KXB63266.1|	436	335	329	5.99e-114	52.584	Olsenella sp. DNF00959
LCVA_42	42	gi|987355814|gb|KXB68434.1|	104	80	73	4.95e-18	49.315	Peptoniphilus coxii
LCVA_42	42	gi|690805149|gb|KGF49999.1|	104	98	104	1.36e-18	42.308	Prevotella disiens DNF00882
LCVA_42	42	gi|690794322|gb|KGF40415.1|	104	99	104	4.1e-18	40.385	Prevotella_bivia
LCVA_43	43	gi|1331369685|gb|PNH21475.1|	595	633	626	0	68.211	Lachnospiraceae bacterium
LCVA_43	43	WP_006905840.1	595	597	592	0	65.203	Shuttleworthia_satelles
LCVA_43	43	EEP29452.1	595	597	592	0	65.203	Shuttleworthia_satelles
LCVA_45	45	gi|690782555|gb|KGF29519.1|	523	492	519	1.48e-84	32.755	Peptoniphilus lacrimalis DNF00528
LCVA_45	45	gi|1331366085|gb|PNH17902.1|	523	510	532	6.77e-90	30.827	Lachnospiraceae bacterium
LCVA_45	45	gi|987351144|gb|KXB63937.1|	523	507	526	1.11e-90	28.897	Olsenella sp. DNF00959
LCVA_46	46	gi|327491678|gb|EGF23452.1|	80	81	76	2e-12	43.421	Atopobium vaginae DSM 15829
LCVA_46	46	gi|690782553|gb|KGF29517.1|	80	73	71	6.42e-07	38.028	Peptoniphilus lacrimalis DNF00528
LCVA_46	46	gi|987351146|gb|KXB63939.1|	80	84	76	1.44e-09	34.211	Olsenella sp. DNF00959
LCVA_47	47	gi|1331366082|gb|PNH17899.1|	522	526	461	4.06e-95	36.876	Lachnospiraceae bacterium
LCVA_47	47	gi|690782552|gb|KGF29516.1|	522	476	525	1.95e-82	34.857	Peptoniphilus lacrimalis DNF00528
LCVA_48	48	gi|1331366083|gb|PNH17900.1|	342	370	308	6.49e-86	38.636	Lachnospiraceae bacterium
LCVA_50	50	gi|1001050986|gb|KXO16152.1|	164	147	147	7.77e-52	55.782	Clostridiales bacterium KA00134
LCVA_50	50	gi|690759606|gb|KGF08088.1|	164	145	142	4.98e-48	52.817	Tissierellia bacterium S7-1-4
LCVA_50	50	gi|690763422|gb|KGF11667.1|	164	155	149	1e-47	51.678	Tissierellia bacterium S5-A11
LCVA_53	53	gi|987346222|gb|KXB59222.1|	343	737	247	7.57e-60	43.725	Lachnoanaerobaculum saburreum
LCVA_53	53	gi|1331366433|gb|PNH18247.1|	343	736	249	2.04e-59	41.767	Lachnospiraceae bacterium
LCVA_53	53	gi|987349562|gb|KXB62396.1|	343	809	249	9.22e-49	36.546	Olsenella sp. DNF00959
LCVA_55	55	WP_074716637.1	639	588	557	3.2e-80	34.291	Lachnobacterium_bovis
LCVA_55	55	SDY19392.1	639	588	557	3.2e-80	34.291	Lachnobacterium_bovis_DSM_14045
LCVA_59	59	gi|1481358491|gb|RJG32711.1|	238	231	227	1.66e-95	59.471	Streptococcus pyogenes
LCVA_59	59	gi|1002878632|gb|KXU56145.1|	238	234	232	3.55e-69	49.138	Streptococcus salivarius
LCVA_59	59	gi|987340032|gb|KXB53331.1|	238	231	230	1.78e-71	48.261	Coriobacteriales bacterium DNF00809
LCVA_61	61	WP_074717530.1	256	239	254	3.2e-82	53.937	Lachnobacterium_bovis
LCVA_61	61	SDY38918.1	256	239	254	3.2e-82	53.937	Lachnobacterium_bovis_DSM_14045
LCVA_61	61	gi|1331367498|gb|PNH19306.1|	256	251	256	7.67e-83	45.312	Lachnospiraceae bacterium
LCVA_63	63	WP_074716637.1	569	588	398	2.92e-92	40.452	Lachnobacterium_bovis
LCVA_63	63	SDY19392.1	569	588	398	2.92e-92	40.452	Lachnobacterium_bovis_DSM_14045
LCVA_63	63	gi|1331366433|gb|PNH18247.1|	569	736	444	7.73e-89	36.937	Lachnospiraceae bacterium
LCVA_64	64	gi|1331368270|gb|PNH20076.1|	349	339	332	2.01e-139	59.337	Lachnospiraceae bacterium
LCVA_64	64	gi|987347446|gb|KXB60377.1|	349	348	331	3.18e-135	57.704	Lachnoanaerobaculum saburreum
LCVA_64	64	gi|690761357|gb|KGF09742.1|	349	335	332	1.36e-123	54.217	Clostridiales bacterium S5-A14a
LCVA_65	65	gi|987347447|gb|KXB60378.1|	215	215	215	2.95e-81	59.535	Lachnoanaerobaculum saburreum
LCVA_65	65	gi|987326365|gb|KXB40148.1|	215	221	199	2.84e-72	52.261	Clostridiales bacterium KA00274
LCVA_65	65	gi|690761358|gb|KGF09743.1|	215	214	214	7.1e-75	50.467	Clostridiales bacterium S5-A14a
LCVA_66	66	gi|987347448|gb|KXB60379.1|	294	293	240	4.07e-97	61.667	Lachnoanaerobaculum saburreum
LCVA_66	66	gi|296888605|gb|EFH27344.1|	294	277	296	6.82e-89	46.622	Gardnerella vaginalis AMD
LCVA_66	66	gi|1446049164|gb|RDY20556.1|	294	281	293	6.9e-87	46.416	Criibacterium bergeronii
LCVA_67	67	WP_074716255.1	220	234	205	3.57e-64	49.268	Lachnobacterium_bovis
LCVA_67	67	WP_006906359.1	220	228	223	1.57e-69	48.43	Shuttleworthia_satelles
LCVA_67	67	EEP28546.1	220	228	223	1.57e-69	48.43	Shuttleworthia_satelles
LCVA_69	69	gi|987343666|gb|KXB56844.1|	448	449	440	0	57.045	Lachnoanaerobaculum saburreum
LCVA_69	69	gi|1331369513|gb|PNH21303.1|	448	458	440	1.94e-178	53.182	Lachnospiraceae bacterium
LCVA_69	69	gi|1604459027|gb|TFF64497.1|	448	446	446	6.52e-156	49.103	Helcococcus ovis
LCVA_70	70	EGG79566.1	200	204	184	1e-83	62.5	Lachnospiraceae_bacterium_2_1_46FAA
LCVA_70	70	WP_074714980.1	200	208	200	2.31e-74	54	Lachnobacterium_bovis
LCVA_70	70	SDX85152.1	200	208	200	2.31e-74	54	Lachnobacterium_bovis_DSM_14045
LCVA_71	71	gi|985326383|gb|KXA10258.1|	327	331	324	4.99e-68	42.284	Clostridium perfringens
LCVA_71	71	EGG84717.1	327	321	334	1.01e-72	41.317	Lachnospiraceae_bacterium_2_1_46FAA
LCVA_71	71	gi|690780717|gb|KGF27763.1|	327	313	322	2.54e-63	36.646	Prevotella histicola JCM 15637 = DNF00424
LCVA_72	72	gi|987332659|gb|KXB46219.1|	338	337	338	0	88.757	Tissierellia bacterium KA00581
LCVA_72	72	gi|987352541|gb|KXB65290.1|	338	348	338	0	83.728	Parvimonas sp. KA00067
LCVA_72	72	gi|985377601|gb|KXA59134.1|	338	339	338	0	78.698	Streptococcus mitis
LCVA_73	73	gi|987343181|gb|KXB56368.1|	262	259	257	3.72e-150	77.432	Lachnoanaerobaculum saburreum
LCVA_73	73	gi|985326804|gb|KXA10653.1|	262	257	250	4.79e-134	71.6	Finegoldia magna
LCVA_73	73	gi|985326070|gb|KXA09963.1|	262	261	254	3.04e-137	71.26	Clostridium perfringens
LCVA_74	74	gi|987343182|gb|KXB56369.1|	346	370	372	5.72e-159	61.022	Lachnoanaerobaculum saburreum
LCVA_74	74	gi|987357062|gb|KXB69607.1|	346	360	359	8.79e-91	45.125	Peptoniphilus sp. DNF00840
LCVA_74	74	gi|987354369|gb|KXB67056.1|	346	366	361	3.59e-96	44.598	Peptoniphilus coxii
LCVA_75	75	gi|987343183|gb|KXB56370.1|	515	514	515	0	76.311	Lachnoanaerobaculum saburreum
LCVA_75	75	gi|985323465|gb|KXA07505.1|	515	497	501	1.62e-177	51.297	Clostridium perfringens
LCVA_75	75	gi|987334685|gb|KXB48137.1|	515	511	511	3e-168	49.511	Tissierellia bacterium KA00581
LCVA_76	76	gi|987343184|gb|KXB56371.1|	278	232	231	3.42e-90	57.143	Lachnoanaerobaculum saburreum
LCVA_76	76	gi|987352792|gb|KXB65532.1|	278	281	279	9.3e-90	49.821	Parvimonas sp. KA00067
LCVA_76	76	gi|987334684|gb|KXB48136.1|	278	281	280	7.22e-89	48.571	Tissierellia bacterium KA00581
LCVA_77	77	gi|987343185|gb|KXB56372.1|	500	505	499	0	72.545	Lachnoanaerobaculum saburreum
LCVA_77	77	gi|987354368|gb|KXB67055.1|	500	509	499	0	63.727	Peptoniphilus coxii
LCVA_77	77	gi|690790076|gb|KGF36544.1|	500	510	499	0	62.926	Peptoniphilus lacrimalis DNF00528
LCVA_78	78	gi|987343186|gb|KXB56373.1|	364	355	352	2.43e-147	58.239	Lachnoanaerobaculum saburreum
LCVA_78	78	gi|985323859|gb|KXA07873.1|	364	366	368	4.81e-101	45.924	Finegoldia magna
LCVA_78	78	gi|987354367|gb|KXB67054.1|	364	360	354	1.35e-102	45.48	Peptoniphilus coxii
LCVA_79	79	gi|987343187|gb|KXB56374.1|	313	311	313	1.67e-168	72.524	Lachnoanaerobaculum saburreum
LCVA_79	79	gi|985293632|gb|KWZ78783.1|	313	312	305	5.79e-110	54.098	Anaerococcus tetradius
LCVA_79	79	gi|985346566|gb|KXA29373.1|	313	318	304	1.08e-107	52.632	Peptoniphilus harei
LCVA_80	80	EGG81157.1	143	137	132	6.31e-53	59.848	Lachnospiraceae_bacterium_2_1_46FAA
LCVA_80	80	gi|987351493|gb|KXB64274.1|	143	147	131	1.03e-51	58.779	Olsenella sp. DNF00959
LCVA_80	80	gi|1331367377|gb|PNH19185.1|	143	151	135	1.68e-54	58.519	Lachnospiraceae bacterium
LCVA_81	81	gi|987343188|gb|KXB56375.1|	211	219	211	1.89e-97	65.403	Lachnoanaerobaculum saburreum
LCVA_81	81	WP_074714977.1	211	214	211	4.73e-95	65.403	Lachnobacterium_bovis
LCVA_81	81	SDX85125.1	211	214	211	4.73e-95	65.403	Lachnobacterium_bovis_DSM_14045
LCVA_82	82	EGG81149.1	254	242	214	6.51e-45	35.047	Lachnospiraceae_bacterium_2_1_46FAA
LCVA_82	82	gi|667704719|gb|KFA57611.1|	254	242	210	9.42e-41	32.381	Mageeibacillus indolicus
LCVA_83	83	gi|987343191|gb|KXB56378.1|	273	273	272	1.34e-128	62.868	Lachnoanaerobaculum saburreum
LCVA_83	83	gi|1331367678|gb|PNH19485.1|	273	278	272	6.67e-117	60.294	Mageeibacillus indolicus
LCVA_83	83	EGG81148.1	273	275	266	1.32e-120	59.774	Lachnospiraceae_bacterium_2_1_46FAA
LCVA_84	84	EGG81513.1	403	415	399	9.72e-155	59.9	Lachnospiraceae_bacterium_2_1_46FAA
LCVA_84	84	WP_074718092.1	403	416	400	5.96e-154	59	Lachnobacterium_bovis
LCVA_84	84	SDY51507.1	403	416	400	5.96e-154	59	Lachnobacterium_bovis_DSM_14045
LCVA_85	85	gi|987380314|gb|KXB91698.1|	394	396	391	0	71.611	Veillonellaceae bacterium KA00182
LCVA_85	85	gi|987325423|gb|KXB39240.1|	394	396	391	0	70.844	Clostridiales bacterium KA00274
LCVA_85	85	gi|985325335|gb|KXA09278.1|	394	389	391	6.75e-147	56.777	Finegoldia magna
LCVA_86	86	EGG85413.1	440	449	440	0	62.045	Lachnospiraceae_bacterium_2_1_46FAA
LCVA_86	86	WP_143470196.1	440	441	423	1.98e-174	55.556	Lachnobacterium_bovis
LCVA_86	86	SDX85886.1	440	448	423	1.78e-174	55.556	Lachnobacterium_bovis_DSM_14045
LCVA_87	87	WP_074718601.1	291	293	280	1.79e-107	52.857	Lachnobacterium_bovis
LCVA_87	87	SDY63542.1	291	293	280	1.79e-107	52.857	Lachnobacterium_bovis_DSM_14045
LCVA_87	87	gi|987343128|gb|KXB56318.1|	291	286	286	1.74e-98	50	Lachnoanaerobaculum saburreum
LCVA_88	88	WP_159429347.1	278	305	261	7.03e-77	45.977	Lachnobacterium_bovis
LCVA_88	88	SDY61413.1	278	305	261	7.03e-77	45.977	Lachnobacterium_bovis_DSM_14045
LCVA_88	88	gi|987342145|gb|KXB55364.1|	278	284	275	3.34e-73	45.455	Lachnoanaerobaculum saburreum
LCVA_89	89	gi|690788317|gb|KGF34949.1|	129	72	58	5.9e-19	58.621	Peptoniphilus lacrimalis DNF00528
LCVA_89	89	gi|1331368516|gb|PNH20320.1|	129	81	67	8.71e-23	56.716	Lachnospiraceae bacterium
LCVA_89	89	gi|987352880|gb|KXB65618.1|	129	65	62	1.33e-19	56.452	Peptoniphilus coxii
LCVA_90	90	gi|1331368472|gb|PNH20276.1|	560	560	560	0	68.036	Lachnospiraceae bacterium
LCVA_90	90	WP_006907201.1	560	560	560	0	67.321	Shuttleworthia_satelles
LCVA_90	90	EEP27530.1	560	560	560	0	67.321	Shuttleworthia_satelles
LCVA_91	91	gi|1331368805|gb|PNH20602.1|	198	200	195	6.64e-85	60	Lachnospiraceae bacterium
LCVA_91	91	WP_006906646.1	198	205	193	4.69e-85	59.067	Shuttleworthia_satelles
LCVA_91	91	EEP27657.1	198	205	193	4.69e-85	59.067	Shuttleworthia_satelles
LCVA_92	92	WP_074716349.1	251	251	249	9.15e-146	75.1	Lachnobacterium_bovis
LCVA_92	92	SDY12533.1	251	251	249	9.15e-146	75.1	Lachnobacterium_bovis_DSM_14045
LCVA_92	92	EGG80977.1	251	250	250	4.08e-141	71.2	Lachnospiraceae_bacterium_2_1_46FAA
LCVA_93	93	WP_006907207.1	429	407	397	2.26e-77	35.768	Shuttleworthia_satelles
LCVA_93	93	EEP27536.1	429	407	397	2.26e-77	35.768	Shuttleworthia_satelles
LCVA_93	93	EGG84010.1	429	387	408	8.16e-83	35.294	Lachnospiraceae_bacterium_2_1_46FAA
LCVA_94	94	gi|987360294|gb|KXB72659.1|	167	162	157	3.7e-67	58.599	Peptostreptococcus anaerobius
LCVA_94	94	gi|998234726|gb|KXI13513.1|	167	162	157	5.56e-65	56.051	Peptostreptococcus anaerobius
LCVA_94	94	gi|1331366625|gb|PNH18438.1|	167	182	166	8.68e-54	48.193	Mageeibacillus indolicus
LCVA_95	95	EGG79726.1	259	292	256	3.19e-85	51.172	Lachnospiraceae_bacterium_2_1_46FAA
LCVA_95	95	gi|1331369552|gb|PNH21342.1|	259	306	256	8.31e-84	48.047	Lachnospiraceae bacterium
LCVA_95	95	gi|987343137|gb|KXB56324.1|	259	294	256	3e-79	47.266	Lachnoanaerobaculum saburreum
LCVA_96	96	gi|690762886|gb|KGF11157.1|	62	306	62	1.11e-30	85.484	Peptostreptococcus sp. MV1
LCVA_96	96	gi|690762882|gb|KGF11155.1|	62	306	62	1.83e-30	83.871	Peptostreptococcus sp. MV1
LCVA_96	96	gi|998231682|gb|KXI10666.1|	62	128	62	4.75e-32	83.871	Peptostreptococcus anaerobius
LCVA_97	97	gi|987354113|gb|KXB66804.1|	150	566	150	1.54e-83	78	Parvimonas sp. KA00067
LCVA_97	97	gi|690762253|gb|KGF10579.1|	150	541	150	2.69e-83	77.333	Tissierellia bacterium S5-A11
LCVA_97	97	gi|690762886|gb|KGF11157.1|	150	306	150	5.92e-84	76.667	Peptostreptococcus sp. MV1
LCVA_98	98	gi|1446049902|gb|RDY21274.1|	79	76	74	1.46e-39	79.73	Criibacterium bergeronii
LCVA_98	98	gi|690758209|gb|KGF06823.1|	79	71	68	1.82e-21	57.353	Tissierellia bacterium S7-1-4
LCVA_98	98	gi|987328801|gb|KXB42496.1|	79	81	72	8.32e-24	54.167	Clostridiales bacterium KA00274
LCVA_100	100	gi|985348162|gb|KXA30926.1|	54	424	33	2.4	42.424	Peptoniphilus harei
LCVA_102	102	gi|987356875|gb|KXB69435.1|	45	369	30	0.92	43.333	Peptoniphilus sp. DNF00840
LCVA_102	102	gi|690760588|gb|KGF09020.1|	45	535	28	1.5	42.857	Clostridiales bacterium S5-A14a
LCVA_102	102	gi|1418402396|gb|AWZ29497.1|	45	530	38	2.3	39.474	Streptococcus agalactiae
LCVA_105	105	gi|985382812|gb|KXA64026.1|	84	375	84	9.93e-36	64.286	Veillonella atypica
LCVA_105	105	gi|987374416|gb|KXB86051.1|	84	350	74	3.22e-30	62.162	Veillonella_parvula
LCVA_105	105	gi|690750624|gb|KGE99713.1|	84	197	84	1.16e-25	47.619	Actinomyces sp. S4-C9
LCVA_106	106	gi|985382812|gb|KXA64026.1|	125	375	109	3.08e-37	57.798	Veillonella atypica
LCVA_106	106	gi|987374416|gb|KXB86051.1|	125	350	110	7.45e-32	52.727	Streptococcus_sp._FDAARGOS_521
LCVA_106	106	gi|987377635|gb|KXB89165.1|	125	181	110	2.83e-34	49.091	Veillonella dispar
LCVA_108	108	gi|985327127|gb|KXA10962.1|	476	455	492	4.33e-98	36.789	Clostridium perfringens
LCVA_108	108	gi|690760456|gb|KGF08888.1|	476	464	409	8.18e-78	35.697	Clostridiales bacterium S5-A14a
LCVA_108	108	gi|690759182|gb|KGF07687.1|	476	462	494	2.99e-84	35.223	Tissierellia bacterium S7-1-4
LCVA_109	109	WP_074715964.1	90	91	92	1.16e-22	47.826	Lachnobacterium_bovis
LCVA_109	109	SDY01853.1	90	91	92	1.16e-22	47.826	Lachnobacterium_bovis_DSM_14045
LCVA_110	110	WP_074715967.1	170	170	170	9.08e-36	39.412	Lachnobacterium_bovis
LCVA_110	110	SDY01887.1	170	170	170	9.08e-36	39.412	Lachnobacterium_bovis_DSM_14045
LCVA_111	111	WP_074715969.1	578	619	628	4.33e-155	40.924	Lachnobacterium_bovis
LCVA_111	111	SDY01917.1	578	619	628	4.33e-155	40.924	Lachnobacterium_bovis_DSM_14045
LCVA_112	112	WP_074715970.1	616	614	624	2.87e-163	41.346	Lachnobacterium_bovis
LCVA_112	112	SDY01944.1	616	614	624	2.87e-163	41.346	Lachnobacterium_bovis_DSM_14045
LCVA_113	113	WP_074715972.1	538	500	540	5.29e-110	36.111	Lachnobacterium_bovis
LCVA_113	113	SDY01969.1	538	500	540	5.29e-110	36.111	Lachnobacterium_bovis_DSM_14045
LCVA_114	114	WP_074715974.1	154	165	155	1.01e-49	49.677	Lachnobacterium_bovis
LCVA_114	114	SDY02003.1	154	165	155	1.01e-49	49.677	Lachnobacterium_bovis_DSM_14045
LCVA_114	114	gi|1446049491|gb|RDY20872.1|	154	141	142	4.2e-25	35.915	Criibacterium bergeronii
LCVA_115	115	gi|985298059|gb|KWZ82953.1|	74	84	58	3.74e-19	63.793	Bacillus coagulans
LCVA_115	115	WP_074715976.1	74	82	74	3.49e-29	58.108	Lachnobacterium_bovis
LCVA_115	115	SDY02031.1	74	82	74	3.49e-29	58.108	Lachnobacterium_bovis_DSM_14045
LCVA_116	116	WP_074715978.1	138	143	85	1.94e-19	48.235	Lachnobacterium_bovis
LCVA_116	116	SDY02056.1	138	143	85	1.94e-19	48.235	Lachnobacterium_bovis_DSM_14045
LCVA_117	117	WP_074715980.1	532	493	526	2.96e-139	44.867	Lachnobacterium_bovis
LCVA_117	117	SDY02084.1	532	493	526	2.96e-139	44.867	Lachnobacterium_bovis_DSM_14045
LCVA_118	118	WP_074715982.1	129	132	126	8.95e-52	60.317	Lachnobacterium_bovis
LCVA_118	118	SDY02118.1	129	132	126	8.95e-52	60.317	Lachnobacterium_bovis_DSM_14045
LCVA_118	118	gi|985298079|gb|KWZ82973.1|	129	134	121	2.04e-23	39.669	Bacillus coagulans
LCVA_119	119	WP_074715984.1	159	158	154	3.74e-28	31.818	Lachnobacterium_bovis
LCVA_119	119	SDY02149.1	159	158	154	3.74e-28	31.818	Lachnobacterium_bovis_DSM_14045
LCVA_120	120	WP_074716005.1	439	432	445	4.36e-74	32.809	Lachnobacterium_bovis
LCVA_120	120	SDY02497.1	439	432	445	4.36e-74	32.809	Lachnobacterium_bovis_DSM_14045
LCVA_121	121	EGG82369.1	66	68	52	1.14e-08	44.231	Lachnospiraceae_bacterium_2_1_46FAA
LCVA_121	121	WP_006907228.1	66	68	63	2.75e-09	36.508	Shuttleworthia_satelles
LCVA_121	121	EEP27557.1	66	68	63	2.75e-09	36.508	Shuttleworthia_satelles
LCVA_122	122	EGG82368.1	170	171	162	2.09e-66	58.642	Lachnospiraceae_bacterium_2_1_46FAA
LCVA_122	122	WP_074716009.1	170	172	175	3.81e-68	57.714	Lachnobacterium_bovis
LCVA_122	122	SDY02562.1	170	172	175	3.81e-68	57.714	Lachnobacterium_bovis_DSM_14045
LCVA_123	123	WP_006907230.1	141	141	141	3.76e-87	84.397	Shuttleworthia_satelles
LCVA_123	123	EEP27559.1	141	141	141	3.76e-87	84.397	Shuttleworthia_satelles
LCVA_123	123	WP_074716011.1	141	141	141	1.54e-80	78.014	Lachnobacterium_bovis
LCVA_124	124	WP_044961458.1	233	230	229	6.93e-135	77.729	Shuttleworthia_satelles
LCVA_124	124	WP_022749956.1	233	231	229	7.1e-135	76.419	Lachnobacterium_bovis
LCVA_124	124	SDY02616.1	233	231	229	7.1e-135	76.419	Lachnobacterium_bovis_DSM_14045
LCVA_125	125	WP_006907233.1	170	214	161	4.84e-79	68.944	Shuttleworthia_satelles
LCVA_125	125	EEP27562.1	170	214	161	4.84e-79	68.944	Shuttleworthia_satelles
LCVA_125	125	EGG82364.1	170	178	161	1.72e-76	67.702	Lachnospiraceae_bacterium_2_1_46FAA
LCVA_126	126	WP_074716013.1	125	124	125	1.19e-53	83.2	Lachnobacterium_bovis
LCVA_126	126	SDY02679.1	125	124	125	1.19e-53	83.2	Lachnobacterium_bovis_DSM_14045
LCVA_126	126	gi|1331368473|gb|PNH20277.1|	125	126	126	5.8e-48	70.635	Lachnospiraceae bacterium
LCVA_127	127	WP_074716019.1	1313	1	1311	0	71.997	Lachnobacterium_bovis
LCVA_127	127	SDY02775.1	1313	1	1311	0	71.997	Lachnobacterium_bovis_DSM_14045
LCVA_127	127	EEP27566.1	1326	1	1311	0	70.453	Shuttleworthia_satelles
LCVA_128	128	EGG82355.1	1217	1	1208	0	72.93	Lachnospiraceae_bacterium_2_1_46FAA
LCVA_128	128	WP_006907238.1	1210	10	1207	0	71.429	Shuttleworthia_satelles
LCVA_128	128	EEP27567.1	1210	10	1207	0	71.429	Shuttleworthia_satelles
LCVA_129	129	gi|1481356416|gb|RJG30691.1|	420	419	415	5.06e-160	54.699	Streptococcus pyogenes
LCVA_129	129	gi|757406444|gb|KIS10818.1|	420	419	415	6.42e-154	53.494	Streptococcus equi subsp. zooepidemicus Sz57
LCVA_129	129	gi|757402373|gb|KIS06940.1|	420	419	415	5.44e-153	53.253	Streptococcus equi subsp. zooepidemicus Sz16
LCVA_130	130	gi|1481356416|gb|RJG30691.1|	423	419	416	0	70.673	Streptococcus pyogenes
LCVA_130	130	gi|757406444|gb|KIS10818.1|	423	419	420	0	68.81	Streptococcus equi subsp. zooepidemicus Sz57
LCVA_130	130	gi|757402373|gb|KIS06940.1|	423	419	420	0	68.81	Streptococcus equi subsp. zooepidemicus Sz16
LCVA_131	131	gi|757406443|gb|KIS10817.1|	568	566	566	0	56.89	Streptococcus equi subsp. zooepidemicus Sz57
LCVA_131	131	gi|757415771|gb|KIS19674.1|	568	566	566	0	56.714	Streptococcus equi subsp. zooepidemicus Sz35
LCVA_131	131	gi|757402374|gb|KIS06941.1|	568	566	566	0	56.714	Streptococcus equi subsp. zooepidemicus Sz16
LCVA_132	132	gi|1481356419|gb|RJG30694.1|	436	435	436	0	76.147	Streptococcus pyogenes
LCVA_132	132	gi|757406441|gb|KIS10815.1|	436	434	436	0	75.917	Streptococcus equi subsp. zooepidemicus Sz57
LCVA_132	132	gi|757415773|gb|KIS19676.1|	436	434	436	0	75.917	Streptococcus equi subsp. zooepidemicus Sz35
LCVA_133	133	gi|1481356420|gb|RJG30695.1|	286	286	286	3.8e-173	82.517	Streptococcus pyogenes
LCVA_133	133	gi|757406440|gb|KIS10814.1|	286	286	286	3.79e-161	81.818	Streptococcus equi subsp. zooepidemicus Sz57
LCVA_133	133	gi|757415774|gb|KIS19677.1|	286	286	286	4.67e-161	81.818	Streptococcus equi subsp. zooepidemicus Sz35
LCVA_134	134	gi|1481356421|gb|RJG30696.1|	275	271	271	4.24e-107	53.137	Streptococcus pyogenes
LCVA_134	134	gi|757402378|gb|KIS06945.1|	275	276	266	1.38e-91	45.865	Streptococcus equi subsp. zooepidemicus Sz16
LCVA_134	134	gi|757415775|gb|KIS19678.1|	275	276	266	3.06e-90	45.489	Streptococcus equi subsp. zooepidemicus Sz35
LCVA_135	135	EGG82327.1	139	139	139	5.91e-89	87.77	Lachnospiraceae_bacterium_2_1_46FAA
LCVA_135	135	WP_022749947.1	139	139	139	3.42e-88	85.612	Lachnobacterium_bovis
LCVA_135	135	SDY02833.1	139	139	139	3.42e-88	85.612	Lachnobacterium_bovis_DSM_14045
LCVA_136	136	WP_022749945.1	163	163	163	1.91e-102	84.663	Lachnobacterium_bovis
LCVA_136	136	WP_006907246.1	163	163	163	3.8e-102	83.436	Shuttleworthia_satelles
LCVA_136	136	EEP27575.1	163	163	163	3.8e-102	83.436	Shuttleworthia_satelles
LCVA_137	137	WP_074716023.1	705	705	704	0	81.676	Lachnobacterium_bovis
LCVA_137	137	SDY02894.1	705	705	704	0	81.676	Lachnobacterium_bovis_DSM_14045
LCVA_137	137	WP_083790763.1	705	704	703	0	80.797	Shuttleworthia_satelles
LCVA_138	138	WP_006907249.1	409	412	412	0	85.194	Shuttleworthia_satelles
LCVA_138	138	EEP27578.1	409	412	412	0	85.194	Shuttleworthia_satelles
LCVA_138	138	WP_022749943.1	409	395	409	0	81.418	Lachnobacterium_bovis
LCVA_139	139	WP_074716745.1	530	534	528	0	66.098	Lachnobacterium_bovis
LCVA_139	139	SDY21051.1	530	534	528	0	66.098	Lachnobacterium_bovis_DSM_14045
LCVA_139	139	gi|985328391|gb|KXA12151.1|	530	535	531	0	62.9	Clostridium perfringens
LCVA_140	140	WP_006905656.1	89	91	87	4.42e-39	70.115	Shuttleworthia_satelles
LCVA_140	140	EEP29268.1	89	91	87	4.42e-39	70.115	Shuttleworthia_satelles
LCVA_140	140	WP_074718077.1	89	96	83	1.71e-35	62.651	Lachnobacterium_bovis
LCVA_141	141	WP_006905341.1	325	372	355	6.13e-112	42.535	Shuttleworthia_satelles
LCVA_141	141	EEP28953.1	325	372	355	6.13e-112	42.535	Shuttleworthia_satelles
LCVA_141	141	EEP27429.1	325	258	233	5.86e-43	35.193	Shuttleworthia_satelles
LCVA_143	143	gi|987344322|gb|KXB57471.1|	423	247	244	3.59e-76	52.869	Gemella asaccharolytica
LCVA_143	143	gi|987344514|gb|KXB57645.1|	423	246	250	1.7e-76	48.4	Gemella asaccharolytica
LCVA_145	145	gi|987353618|gb|KXB66330.1|	600	583	578	0	57.439	Parvimonas sp. KA00067
LCVA_145	145	gi|987335338|gb|KXB48749.1|	600	589	575	0	52.696	Tissierellia bacterium KA00581
LCVA_145	145	gi|1604462076|gb|TFF67406.1|	600	585	576	0	51.389	Helcococcus ovis
LCVA_146	146	gi|1333050427|gb|PNP89501.1|	300	620	257	5.67e-93	56.809	Gardnerella sp. KA00735
LCVA_146	146	gi|998239102|gb|KXI17677.1|	300	617	257	1.95e-92	56.42	Gardnerella vaginalis
LCVA_146	146	gi|1604459679|gb|TFF65103.1|	300	293	294	2.04e-96	51.361	Helcococcus ovis
LCVA_147	147	gi|690760990|gb|KGF09389.1|	515	511	498	0	64.257	Clostridiales bacterium S5-A14a
LCVA_147	147	gi|987342350|gb|KXB55563.1|	515	497	499	2.43e-178	54.509	Lachnoanaerobaculum saburreum
LCVA_147	147	gi|987353619|gb|KXB66331.1|	515	508	499	2.37e-179	49.9	Parvimonas sp. KA00067
LCVA_148	148	gi|327491634|gb|EGF23408.1|	318	282	281	1.02e-79	43.06	Atopobium vaginae DSM 15829
LCVA_148	148	gi|996350899|gb|KXG88856.1|	318	282	281	4.02e-79	42.705	Atopobium vaginae
LCVA_148	148	gi|987321519|gb|KXB35548.1|	318	281	282	1.15e-82	42.553	Atopobium deltae
LCVA_149	149	WP_044958382.1	198	200	195	6.93e-81	55.897	Shuttleworthia_satelles
LCVA_149	149	EEP28952.1	198	223	195	2.05e-80	55.897	Shuttleworthia_satelles
LCVA_149	149	gi|985341931|gb|KXA24893.1|	851	198	129	9.3e-37	38.806	Fusobacterium nucleatum
LCVA_150	150	WP_074716617.1	226	247	195	7.81e-39	38.974	Lachnobacterium_bovis
LCVA_150	150	SDY19056.1	226	247	195	7.81e-39	38.974	Lachnobacterium_bovis_DSM_14045
LCVA_150	150	gi|985292537|gb|KWZ77776.1|	226	296	196	3.46e-34	34.694	Bacillus coagulans
LCVA_151	151	WP_044958410.1	212	209	208	4.39e-122	78.365	Shuttleworthia_satelles
LCVA_151	151	EEP28948.1	212	212	208	3.96e-122	78.365	Shuttleworthia_satelles
LCVA_151	151	gi|1331368710|gb|PNH20507.1|	212	209	206	5e-114	74.757	Lachnospiraceae bacterium
LCVA_152	152	WP_006905338.1	463	461	456	0	71.272	Shuttleworthia_satelles
LCVA_152	152	EEP28950.1	463	461	456	0	71.272	Shuttleworthia_satelles
LCVA_152	152	gi|1331368517|gb|PNH20321.1|	463	458	452	0	69.69	Lachnospiraceae bacterium
LCVA_153	153	WP_074719102.1	171	190	154	4.47e-15	31.169	Lachnobacterium_bovis
LCVA_153	153	SDY76995.1	171	190	154	4.47e-15	31.169	Lachnobacterium_bovis_DSM_14045
LCVA_154	154	WP_074716969.1	520	525	525	0	74.857	Lachnobacterium_bovis
LCVA_154	154	SDY26765.1	520	525	525	0	74.857	Lachnobacterium_bovis_DSM_14045
LCVA_154	154	gi|987347718|gb|KXB60639.1|	520	517	521	0	72.361	Lachnoanaerobaculum saburreum
LCVA_155	155	gi|1331367156|gb|PNH18965.1|	222	222	220	6.06e-121	92.273	Lachnospiraceae bacterium
LCVA_155	155	gi|327491824|gb|EGF23598.1|	222	222	222	8.67e-102	62.162	Atopobium vaginae DSM 15829
LCVA_156	156	gi|1331367155|gb|PNH18964.1|	199	199	199	8.97e-141	96.985	Lachnospiraceae bacterium
LCVA_156	156	gi|1604463708|gb|TFF68939.1|	199	199	199	1.01e-140	96.482	Helcococcus ovis
LCVA_157	157	gi|1604463709|gb|TFF68940.1|	63	63	63	1.11e-38	93.651	Helcococcus ovis
LCVA_157	157	SDY26705.1	63	66	53	1.4e-14	52.83	Lachnobacterium_bovis_DSM_14045
LCVA_157	157	WP_074716965.1	63	66	53	1.4e-14	52.83	Lachnospiraceae
LCVA_158	158	gi|1604463710|gb|TFF68941.1|	216	356	216	7.38e-149	92.13	Helcococcus ovis
LCVA_158	158	gi|1331367343|gb|PNH19151.1|	216	365	216	6.23e-82	55.093	Lachnospiraceae bacterium
LCVA_158	158	gi|998232816|gb|KXI11733.1|	216	226	217	1.06e-75	51.613	Peptostreptococcus anaerobius
LCVA_159	159	gi|1604463711|gb|TFF68942.1|	52	127	52	6.24e-29	98.077	Helcococcus ovis
LCVA_159	159	gi|987378827|gb|KXB90275.1|	52	56	51	1.93e-07	50.98	Veillonellaceae bacterium DNF00751
LCVA_159	159	gi|985293159|gb|KWZ78340.1|	52	123	53	1.87e-07	50.943	Anaerococcus tetradius
LCVA_160	160	gi|1604463711|gb|TFF68942.1|	72	127	72	8.98e-42	88.889	Helcococcus ovis
LCVA_161	161	gi|757403236|gb|KIS07774.1|	306	307	306	0	88.562	Streptococcus equi subsp. zooepidemicus Sz16
LCVA_161	161	gi|1604463712|gb|TFF68943.1|	306	306	306	0	80.065	Helcococcus ovis
LCVA_161	161	gi|757416252|gb|KIS20126.1|	306	309	304	5.66e-116	54.276	Streptococcus equi subsp. zooepidemicus Sz35
LCVA_162	162	gi|757403235|gb|KIS07773.1|	320	320	320	0	90.625	Streptococcus equi subsp. zooepidemicus Sz16
LCVA_162	162	gi|1604463713|gb|TFF68944.1|	320	320	320	0	89.062	Helcococcus ovis
LCVA_163	163	gi|757403234|gb|KIS07772.1|	126	126	126	8.06e-83	94.444	Streptococcus equi subsp. zooepidemicus Sz16
LCVA_163	163	gi|1331367352|gb|PNH19160.1|	126	126	126	4.28e-81	92.857	Lachnospiraceae bacterium
LCVA_163	163	gi|757416255|gb|KIS20129.1|	126	126	126	3.27e-78	88.889	Streptococcus equi subsp. zooepidemicus Sz35
LCVA_164	164	gi|987328326|gb|KXB42040.1|	479	486	463	0	81.21	Clostridiales bacterium KA00274
LCVA_164	164	gi|1604463715|gb|TFF68946.1|	479	486	467	0	79.229	Helcococcus ovis
LCVA_164	164	gi|1331367351|gb|PNH19159.1|	479	490	476	0	77.311	Lachnospiraceae bacterium
LCVA_165	165	gi|1418403053|gb|AWZ30154.1|	73	76	67	3.09e-40	95.522	Streptococcus agalactiae
LCVA_165	165	gi|909820537|gb|AKU03823.1|	73	73	73	9.89e-44	94.521	Streptococcus agalactiae
LCVA_165	165	gi|690758907|gb|KGF07432.1|	73	78	73	7.92e-34	72.603	Tissierellia bacterium S7-1-4
LCVA_166	166	gi|909820536|gb|AKU03822.1|	340	340	340	0	91.471	Streptococcus agalactiae
LCVA_166	166	gi|690758908|gb|KGF07433.1|	340	340	329	0	87.234	Tissierellia bacterium S7-1-4
LCVA_166	166	gi|987374792|gb|KXB86415.1|	340	339	332	0	87.048	Veillonella sp. DNF00869
LCVA_167	167	gi|909820535|gb|AKU03821.1|	318	318	318	0	90.881	Streptococcus agalactiae
LCVA_167	167	gi|690758909|gb|KGF07434.1|	318	318	318	0	82.39	Tissierellia bacterium S7-1-4
LCVA_167	167	gi|987356862|gb|KXB69422.1|	318	318	317	0	77.603	Peptoniphilus sp. DNF00840
LCVA_171	171	gi|1604463697|gb|TFF68928.1|	143	143	143	7.21e-102	98.601	Helcococcus ovis
LCVA_171	171	gi|985293162|gb|KWZ78343.1|	143	143	143	1.42e-101	98.601	Anaerococcus tetradius
LCVA_171	171	gi|1446050699|gb|RDY22064.1|	143	143	143	1.28e-100	97.902	Criibacterium bergeronii
LCVA_172	172	gi|987356902|gb|KXB69459.1|	64	64	64	9.47e-43	100	Peptoniphilus sp. DNF00840
LCVA_172	172	gi|985293161|gb|KWZ78342.1|	64	64	64	3.86e-42	98.438	Anaerococcus tetradius
LCVA_172	172	gi|998232817|gb|KXI11734.1|	64	64	64	2.84e-42	98.438	Peptostreptococcus anaerobius
LCVA_173	173	gi|998232816|gb|KXI11733.1|	88	226	88	6.14e-57	95.455	Peptostreptococcus anaerobius
LCVA_173	173	gi|987356903|gb|KXB69460.1|	88	374	88	3.58e-55	94.318	Peptoniphilus sp. DNF00840
LCVA_173	173	gi|987378829|gb|KXB90277.1|	88	193	88	2.59e-56	93.182	Veillonellaceae bacterium DNF00751
LCVA_174	174	gi|998234486|gb|KXI13288.1|	71	71	71	3.7e-43	97.183	Peptostreptococcus anaerobius
LCVA_174	174	gi|1001050367|gb|KXO15573.1|	71	71	71	7.48e-43	94.366	Clostridiales bacterium KA00134
LCVA_174	174	gi|985293362|gb|KWZ78531.1|	71	71	71	1.93e-41	92.958	Anaerococcus tetradius
LCVA_176	176	gi|998234484|gb|KXI13286.1|	181	122	122	4.79e-79	91.803	Peptostreptococcus anaerobius
LCVA_176	176	gi|985310118|gb|KWZ94636.1|	181	181	181	2.11e-118	90.608	Anaerococcus hydrogenalis
LCVA_176	176	gi|690754302|gb|KGF03251.1|	181	181	181	3.12e-84	63.536	Anaerococcus lactolyticus S7-1-13
LCVA_177	177	gi|985323516|gb|KXA07551.1|	278	278	275	0	89.455	Finegoldia magna
LCVA_177	177	gi|985310120|gb|KWZ94638.1|	278	278	278	0	88.129	Anaerococcus hydrogenalis
LCVA_177	177	gi|327491784|gb|EGF23558.1|	278	279	278	0	87.05	Atopobium vaginae DSM 15829
LCVA_178	178	gi|987356908|gb|KXB69465.1|	480	472	470	2.61e-139	44.681	Peptoniphilus sp. DNF00840
LCVA_182	182	gi|690754303|gb|KGF03252.1|	164	227	163	4.75e-94	77.301	Anaerococcus lactolyticus S7-1-13
LCVA_182	182	WP_074715774.1	164	232	163	4.03e-33	39.264	Lachnobacterium_bovis
LCVA_182	182	SDX97863.1	164	232	163	4.03e-33	39.264	Lachnobacterium_bovis_DSM_14045
LCVA_183	183	gi|987356851|gb|KXB69411.1|	459	459	459	0	95.207	Peptoniphilus sp. DNF00840
LCVA_183	183	gi|690788309|gb|KGF34941.1|	459	459	459	0	92.593	Peptoniphilus lacrimalis DNF00528
LCVA_183	183	gi|985293370|gb|KWZ78539.1|	459	459	457	0	88.84	Anaerococcus tetradius
LCVA_184	184	gi|987356852|gb|KXB69412.1|	219	237	219	1.57e-157	96.347	Peptoniphilus sp. DNF00840
LCVA_184	184	gi|690788310|gb|KGF34942.1|	219	219	219	1.1e-156	95.89	Peptoniphilus lacrimalis DNF00528
LCVA_184	184	gi|985293371|gb|KWZ78540.1|	219	219	219	1.79e-154	94.064	Anaerococcus tetradius
LCVA_186	186	gi|985293372|gb|KWZ78541.1|	245	246	246	1.75e-143	86.992	Anaerococcus tetradius
LCVA_186	186	gi|690788311|gb|KGF34943.1|	245	246	246	9.08e-142	85.366	Peptoniphilus lacrimalis DNF00528
LCVA_186	186	gi|987356853|gb|KXB69413.1|	245	255	246	1.32e-133	83.74	Peptoniphilus sp. DNF00840
LCVA_187	187	gi|987356854|gb|KXB69414.1|	246	246	246	1.78e-168	93.902	Peptoniphilus sp. DNF00840
LCVA_187	187	gi|690788312|gb|KGF34944.1|	246	246	246	9.23e-168	93.902	Peptoniphilus lacrimalis DNF00528
LCVA_187	187	gi|985293373|gb|KWZ78542.1|	246	246	246	3.74e-154	86.179	Anaerococcus tetradius
LCVA_188	188	gi|987356855|gb|KXB69415.1|	233	233	232	7.05e-162	95.69	Peptoniphilus sp. DNF00840
LCVA_188	188	gi|690788313|gb|KGF34945.1|	233	233	232	7.88e-161	95.259	Peptoniphilus lacrimalis DNF00528
LCVA_188	188	gi|985293374|gb|KWZ78543.1|	233	233	232	2.63e-161	95.259	Anaerococcus tetradius
LCVA_189	189	gi|1331366645|gb|PNH18458.1|	288	276	242	1.37e-123	69.421	Mageeibacillus indolicus
LCVA_189	189	gi|667705054|gb|KFA57907.1|	288	276	242	1.14e-123	69.008	Mageeibacillus indolicus
LCVA_189	189	gi|987339933|gb|KXB53232.1|	288	301	270	1.4e-106	53.704	Coriobacteriales bacterium DNF00809
LCVA_190	190	gi|667705053|gb|KFA57906.1|	298	297	295	2.04e-134	66.102	Mageeibacillus indolicus
LCVA_190	190	gi|1331366646|gb|PNH18459.1|	298	297	295	3.37e-134	66.102	Mageeibacillus indolicus
LCVA_190	190	gi|996352943|gb|KXG90694.1|	298	303	294	2.83e-104	53.061	Atopobium vaginae
LCVA_191	191	gi|667705052|gb|KFA57905.1|	287	289	281	3e-127	66.904	Mageeibacillus indolicus
LCVA_191	191	gi|1331366647|gb|PNH18460.1|	287	289	281	2.52e-127	66.904	Mageeibacillus indolicus
LCVA_191	191	gi|996352942|gb|KXG90693.1|	287	324	271	4.61e-105	57.565	Atopobium vaginae
LCVA_192	192	gi|1331366648|gb|PNH18461.1|	252	252	252	4.03e-143	74.603	Mageeibacillus indolicus
LCVA_192	192	gi|667705051|gb|KFA57904.1|	252	252	252	1.02e-141	73.81	Mageeibacillus indolicus
LCVA_192	192	gi|998232420|gb|KXI11362.1|	252	249	248	2.83e-137	72.984	Streptococcus pasteurianus
LCVA_193	193	EGG80854.1	217	224	208	1.4e-58	49.038	Lachnospiraceae_bacterium_2_1_46FAA
LCVA_193	193	gi|1446049012|gb|RDY20416.1|	217	245	209	6.64e-60	46.89	Criibacterium bergeronii
LCVA_193	193	gi|1331368670|gb|PNH20467.1|	217	215	215	1.17e-57	45.581	Lachnospiraceae bacterium
LCVA_194	194	gi|667705050|gb|KFA57903.1|	222	222	222	2.26e-106	64.865	Mageeibacillus indolicus
LCVA_194	194	gi|1331366649|gb|PNH18462.1|	222	222	222	8.99e-106	64.414	Mageeibacillus indolicus
LCVA_194	194	gi|987339928|gb|KXB53227.1|	222	229	223	3.28e-79	47.534	Coriobacteriales bacterium DNF00809
LCVA_195	195	gi|667705049|gb|KFA57902.1|	441	442	441	1.95e-171	56.689	Mageeibacillus indolicus
LCVA_195	195	gi|1331366650|gb|PNH18463.1|	441	442	441	3.41e-171	56.689	Mageeibacillus indolicus
LCVA_195	195	gi|987339927|gb|KXB53226.1|	441	443	443	1.27e-138	45.372	Coriobacteriales bacterium DNF00809
LCVA_196	196	gi|1596031262|gb|TDN16991.1|	266	266	265	7.44e-56	36.226	Lactobacillus crispatus
LCVA_196	196	gi|998232613|gb|KXI11543.1|	266	268	262	3.74e-56	35.496	Streptococcus pasteurianus
LCVA_196	196	gi|909821223|gb|AKU04509.1|	266	265	259	2.04e-56	35.135	Streptococcus agalactiae
LCVA_197	197	WP_074717193.1	560	564	558	0	52.509	Lachnobacterium_bovis
LCVA_197	197	WP_045001006.1	560	607	608	0	52.138	Shuttleworthia_satelles
LCVA_197	197	EEP27505.1	560	628	608	0	52.138	Shuttleworthia_satelles
LCVA_198	198	gi|1446049178|gb|RDY20569.1|	719	718	682	3.98e-143	40.909	Criibacterium bergeronii
LCVA_198	198	gi|1446050479|gb|RDY21846.1|	719	730	714	9.69e-148	38.095	Criibacterium bergeronii
LCVA_199	199	gi|985322890|gb|KXA06975.1|	321	326	324	7.29e-163	67.284	Clostridium perfringens
LCVA_199	199	gi|392436964|gb|EIW14863.1|	321	324	323	5.87e-162	67.183	Lactobacillus pentosus KCA1
LCVA_199	199	gi|985327825|gb|KXA11626.1|	321	323	322	5.17e-161	66.46	Enterococcus faecium
LCVA_200	200	gi|985327824|gb|KXA11625.1|	267	270	270	1.18e-142	80	Enterococcus faecium
LCVA_200	200	gi|985292552|gb|KWZ77791.1|	267	269	269	1.44e-133	76.58	Bacillus coagulans
LCVA_200	200	gi|392436965|gb|EIW14864.1|	267	269	269	7.61e-127	75.465	Lactobacillus pentosus KCA1
LCVA_201	201	gi|985327823|gb|KXA11624.1|	303	304	301	0	83.056	Enterococcus faecium
LCVA_201	201	gi|985292551|gb|KWZ77790.1|	303	314	303	1.18e-180	78.218	Bacillus coagulans
LCVA_201	201	gi|985322888|gb|KXA06973.1|	303	303	303	1.02e-176	77.558	Clostridium perfringens
LCVA_202	202	gi|649932445|gb|KDS82537.1|	124	121	118	1.03e-49	62.712	Lactobacillus rhamnosus 51B
LCVA_202	202	gi|692528669|gb|KGH43931.1|	124	128	115	1.24e-49	60	Lactobacillus plantarum CMPG5300
LCVA_202	202	gi|985322887|gb|KXA06972.1|	124	124	124	4e-49	58.871	Clostridium perfringens
LCVA_203	203	gi|1446049178|gb|RDY20569.1|	721	718	699	2.84e-161	43.205	Criibacterium bergeronii
LCVA_203	203	gi|1446049567|gb|RDY20946.1|	721	712	707	2.53e-130	38.897	Criibacterium bergeronii
LCVA_203	203	gi|1446050479|gb|RDY21846.1|	721	730	716	2.28e-154	38.268	Criibacterium bergeronii
LCVA_204	204	gi|1446049178|gb|RDY20569.1|	710	718	684	2.41e-166	43.421	Criibacterium bergeronii
LCVA_204	204	gi|1446050479|gb|RDY21846.1|	710	730	715	2.59e-143	37.762	Criibacterium bergeronii
LCVA_204	204	gi|1446049567|gb|RDY20946.1|	710	712	711	1.46e-118	37.553	Criibacterium bergeronii
LCVA_205	205	gi|1446049178|gb|RDY20569.1|	712	718	686	1.62e-163	42.566	Criibacterium bergeronii
LCVA_205	205	gi|1446050479|gb|RDY21846.1|	712	730	721	1.76e-154	39.39	Criibacterium bergeronii
LCVA_205	205	gi|1446049567|gb|RDY20946.1|	712	712	711	9.97e-122	38.256	Criibacterium bergeronii
LCVA_206	206	WP_074716973.1	626	647	639	8.13e-72	27.387	Lachnobacterium_bovis
LCVA_206	206	SDY26846.1	626	647	639	8.13e-72	27.387	Lachnobacterium_bovis_DSM_14045
LCVA_207	207	gi|987381961|gb|KXB93265.1|	223	229	185	1.06e-48	40.541	Veillonellaceae bacterium DNF00626
LCVA_208	208	gi|987381960|gb|KXB93264.1|	271	274	270	1.34e-137	71.852	Veillonellaceae bacterium DNF00626
LCVA_208	208	gi|690761332|gb|KGF09717.1|	271	271	271	5.32e-132	69.373	Clostridiales bacterium S5-A14a
LCVA_208	208	gi|690759909|gb|KGF08372.1|	271	271	264	4.72e-92	53.03	Tissierellia bacterium S7-1-4
LCVA_209	209	gi|987381959|gb|KXB93263.1|	224	226	215	2.01e-74	52.093	Veillonellaceae bacterium DNF00626
LCVA_209	209	gi|987347864|gb|KXB60780.1|	224	223	218	5.92e-76	50	Lachnoanaerobaculum saburreum
LCVA_209	209	gi|1331369238|gb|PNH21031.1|	224	242	219	1.87e-70	45.205	Lachnospiraceae bacterium
LCVA_210	210	gi|987381958|gb|KXB93262.1|	327	335	333	4.09e-128	57.357	Veillonellaceae bacterium DNF00626
LCVA_210	210	gi|690761333|gb|KGF09718.1|	327	347	347	2.12e-108	50.72	Clostridiales bacterium S5-A14a
LCVA_210	210	gi|987331477|gb|KXB45092.1|	327	351	346	6.23e-86	38.728	Tissierellia bacterium KA00581
LCVA_211	211	gi|987347862|gb|KXB60778.1|	141	139	130	6.86e-33	43.846	Lachnoanaerobaculum saburreum
LCVA_211	211	WP_156784473.1	141	148	132	1.97e-36	42.424	Shuttleworthia_satelles
LCVA_211	211	EEP29330.1	141	144	132	1.66e-36	42.424	Shuttleworthia_satelles
LCVA_212	212	WP_156784549.1	430	427	428	1.94e-160	53.738	Shuttleworthia_satelles
LCVA_212	212	EEP27769.1	430	455	428	5.05e-160	53.738	Shuttleworthia_satelles
LCVA_212	212	gi|1331369032|gb|PNH20825.1|	430	461	427	3.2e-157	50.82	Lachnospiraceae bacterium
LCVA_213	213	WP_074717199.1	228	232	228	6.21e-96	61.404	Lachnobacterium_bovis
LCVA_213	213	SDY32036.1	228	232	228	6.21e-96	61.404	Lachnobacterium_bovis_DSM_14045
LCVA_213	213	EGG80359.1	228	232	231	1.27e-93	56.277	Lachnospiraceae_bacterium_2_1_46FAA
LCVA_214	214	WP_074717201.1	554	735	496	9.04e-90	38.105	Lachnobacterium_bovis
LCVA_214	214	SDY32068.1	554	735	496	9.04e-90	38.105	Lachnobacterium_bovis_DSM_14045
LCVA_215	215	WP_045001016.1	754	752	751	0	79.494	Shuttleworthia_satelles
LCVA_215	215	EEP27539.1	754	759	751	0	79.494	Shuttleworthia_satelles
LCVA_215	215	gi|987340250|gb|KXB53547.1|	754	746	751	0	79.228	Lachnoanaerobaculum saburreum
LCVA_216	216	gi|690800018|gb|KGF45541.1|	243	269	234	1.43e-118	68.376	Prevotella melaninogenica DNF00666
LCVA_216	216	gi|690780136|gb|KGF27202.1|	243	260	234	3.61e-115	67.521	Prevotella histicola JCM 15637 = DNF00424
LCVA_216	216	gi|690796869|gb|KGF42813.1|	243	268	234	1.18e-114	67.094	Veillonella_parvula
LCVA_218	218	gi|690759274|gb|KGF07764.1|	221	219	207	2.11e-67	50.725	Tissierellia bacterium S5-A11
LCVA_218	218	WP_006905439.1	221	218	208	1.47e-64	45.673	Shuttleworthia_satelles
LCVA_218	218	EEP29051.1	221	218	208	1.47e-64	45.673	Shuttleworthia_satelles
LCVA_219	219	gi|1331368668|gb|PNH20465.1|	318	293	290	2.14e-75	43.103	Lachnospiraceae bacterium
LCVA_219	219	EGG80849.1	318	291	291	6.82e-73	42.955	Lachnospiraceae_bacterium_2_1_46FAA
LCVA_220	220	gi|985335380|gb|KXA18727.1|	851	679	493	6.72e-166	41.414	Fusobacterium nucleatum
LCVA_220	220	gi|985329853|gb|KXA13511.1|	679	658	691	2.98e-152	39.074	Fusobacterium equinum
LCVA_220	220	gi|690759939|gb|KGF08402.1|	679	660	689	7.15e-136	37.01	Tissierellia bacterium S7-1-4
LCVA_221	221	gi|985339464|gb|KXA22562.1|	851	587	669	0	54.733	Fusobacterium nucleatum
LCVA_221	221	gi|690780416|gb|KGF27473.1|	587	585	582	0	52.921	Prevotella histicola JCM 15637 = DNF00424
LCVA_221	221	gi|987373904|gb|KXB85560.1|	587	600	583	0	52.316	Prevotella_denticola_DNF00960
LCVA_222	222	gi|987342139|gb|KXB55358.1|	707	717	714	0	59.804	Lachnoanaerobaculum saburreum
LCVA_222	222	WP_074716391.1	707	713	718	0	59.61	Lachnobacterium_bovis
LCVA_222	222	SDY13490.1	707	713	718	0	59.61	Lachnobacterium_bovis_DSM_14045
LCVA_223	223	gi|987382252|gb|KXB93549.1|	458	451	451	1.26e-172	54.989	Veillonellaceae bacterium DNF00626
LCVA_223	223	WP_006905093.1	458	456	456	6.19e-170	53.07	Shuttleworthia_satelles
LCVA_223	223	EEP28705.1	458	456	456	6.19e-170	53.07	Shuttleworthia_satelles
LCVA_225	225	gi|987343169|gb|KXB56356.1|	254	226	252	3.97e-41	40.079	Lachnoanaerobaculum saburreum
LCVA_225	225	WP_074718309.1	254	261	242	3.91e-42	35.537	Lachnobacterium_bovis
LCVA_225	225	SDY56548.1	254	261	242	3.91e-42	35.537	Lachnobacterium_bovis_DSM_14045
LCVA_226	226	EGG85412.1	103	102	102	1.42e-40	54.902	Lachnospiraceae_bacterium_2_1_46FAA
LCVA_226	226	WP_006906374.1	103	103	102	4.43e-32	47.059	Shuttleworthia_satelles
LCVA_226	226	EEP28561.1	103	103	102	4.43e-32	47.059	Shuttleworthia_satelles
LCVA_227	227	WP_074718008.1	193	194	181	5e-07	24.862	Lachnobacterium_bovis
LCVA_227	227	WP_006907281.1	193	189	198	1.6e-10	23.232	Shuttleworthia_satelles
LCVA_227	227	EEP27609.1	193	189	198	1.6e-10	23.232	Shuttleworthia_satelles
LCVA_228	228	SDY49327.1	76	76	76	2.57e-32	63.158	Lachnobacterium_bovis_DSM_14045
LCVA_228	228	WP_074718045.1	76	73	73	4.47e-31	63.014	Lachnobacterium_bovis
LCVA_228	228	EEP27610.1	76	79	79	2.57e-27	59.494	Shuttleworthia_satelles
LCVA_229	229	WP_074714778.1	401	363	387	1.43e-33	26.615	Lachnobacterium_bovis
LCVA_229	229	SDX82801.1	401	363	387	1.43e-33	26.615	Lachnobacterium_bovis_DSM_14045
LCVA_230	230	WP_074717996.1	209	210	197	9.07e-86	58.376	Lachnobacterium_bovis
LCVA_230	230	SDY49089.1	209	210	197	9.07e-86	58.376	Lachnobacterium_bovis_DSM_14045
LCVA_230	230	gi|987347570|gb|KXB60498.1|	209	209	206	6.78e-78	53.398	Lachnoanaerobaculum saburreum
LCVA_231	231	WP_074717994.1	210	196	190	1.58e-32	34.211	Lachnobacterium_bovis
LCVA_231	231	SDY48998.1	210	196	190	1.58e-32	34.211	Lachnobacterium_bovis_DSM_14045
LCVA_232	232	WP_074717992.1	175	331	169	8.93e-23	32.544	Lachnobacterium_bovis
LCVA_232	232	SDY48931.1	175	331	169	8.93e-23	32.544	Lachnobacterium_bovis_DSM_14045
LCVA_232	232	EGG81779.1	175	329	170	6.63e-22	31.176	Lachnospiraceae_bacterium_2_1_46FAA
LCVA_233	233	WP_074717990.1	160	159	156	2.84e-78	67.308	Lachnobacterium_bovis
LCVA_233	233	SDY48896.1	160	159	156	2.84e-78	67.308	Lachnobacterium_bovis_DSM_14045
LCVA_233	233	WP_044958396.1	160	160	160	2.1e-75	61.875	Shuttleworthia_satelles
LCVA_234	234	WP_074717988.1	390	393	391	0	70.844	Lachnobacterium_bovis
LCVA_234	234	SDY48861.1	390	393	391	0	70.844	Lachnobacterium_bovis_DSM_14045
LCVA_234	234	EEP27615.1	390	389	389	0	69.152	Shuttleworthia_satelles
LCVA_235	235	WP_006907288.1	164	169	164	1.85e-83	68.293	Shuttleworthia_satelles
LCVA_235	235	EEP27616.1	164	169	164	1.85e-83	68.293	Shuttleworthia_satelles
LCVA_235	235	EGG81776.1	164	165	162	7.99e-82	66.667	Lachnospiraceae_bacterium_2_1_46FAA
LCVA_236	236	WP_074718037.1	287	285	279	2.04e-143	67.742	Lachnobacterium_bovis
LCVA_236	236	SDY48793.1	287	285	279	2.04e-143	67.742	Lachnobacterium_bovis_DSM_14045
LCVA_236	236	EEP27617.1	287	317	283	1.2e-142	63.958	Shuttleworthia_satelles
LCVA_237	237	WP_006907290.1	282	292	281	8.7e-132	62.278	Shuttleworthia_satelles
LCVA_237	237	EEP27618.1	282	292	281	8.7e-132	62.278	Shuttleworthia_satelles
LCVA_237	237	WP_074717984.1	282	282	281	6.9e-125	61.566	Lachnobacterium_bovis
LCVA_238	238	gi|987344212|gb|KXB57368.1|	266	268	262	1.87e-115	61.069	Lachnoanaerobaculum saburreum
LCVA_238	238	WP_044958337.1	266	270	266	2.86e-118	60.15	Shuttleworthia_satelles
LCVA_238	238	EEP27619.1	266	266	262	1.01e-115	59.924	Shuttleworthia_satelles
LCVA_239	239	WP_074717980.1	260	245	244	2.31e-76	46.721	Lachnobacterium_bovis
LCVA_239	239	SDY48691.1	260	245	244	2.31e-76	46.721	Lachnobacterium_bovis_DSM_14045
LCVA_239	239	gi|987344213|gb|KXB57369.1|	260	257	243	1.3e-70	46.091	Lachnoanaerobaculum saburreum
LCVA_240	240	WP_074719213.1	143	142	140	3.94e-76	72.857	Lachnobacterium_bovis
LCVA_240	240	SDY80667.1	143	142	140	3.94e-76	72.857	Lachnobacterium_bovis_DSM_14045
LCVA_240	240	EEP27621.1	143	142	140	9.26e-75	72.857	Shuttleworthia_satelles
LCVA_241	241	EEP27622.1	130	130	130	4.22e-73	81.538	Shuttleworthia_satelles
LCVA_241	241	WP_074719212.1	130	130	130	2.31e-73	80	Lachnobacterium_bovis
LCVA_241	241	SDY80638.1	130	130	130	2.31e-73	80	Lachnobacterium_bovis_DSM_14045
LCVA_243	243	gi|1446049384|gb|RDY20768.1|	570	539	547	9.72e-94	34.004	Criibacterium bergeronii
LCVA_243	243	gi|1446049566|gb|RDY20945.1|	570	559	561	1.37e-89	32.799	Criibacterium bergeronii
LCVA_243	243	WP_074717228.1	570	561	511	9.67e-26	25.049	Lachnobacterium_bovis
LCVA_243	243	SDY32548.1	570	561	511	9.67e-26	25.049	Lachnobacterium_bovis_DSM_14045
LCVA_244	244	EGG80802.1	296	284	281	9.76e-35	25.979	Lachnospiraceae_bacterium_2_1_46FAA
LCVA_245	245	WP_074715986.1	505	270	146	5.01e-55	63.014	Lachnobacterium_bovis
LCVA_245	245	WP_074715988.1	505	270	182	2.5e-55	55.495	Lachnobacterium_bovis
LCVA_245	245	SDY02213.1	505	270	182	2.5e-55	55.495	Lachnobacterium_bovis_DSM_14045
LCVA_246	246	WP_074715986.1	502	270	146	2.72e-55	63.014	Lachnobacterium_bovis
LCVA_246	246	WP_074715988.1	502	270	213	4.03e-56	50.235	Lachnobacterium_bovis
LCVA_246	246	SDY02213.1	502	270	213	4.03e-56	50.235	Lachnobacterium_bovis_DSM_14045
LCVA_247	247	gi|996350874|gb|KXG88831.1|	480	439	480	0	62.917	Atopobium vaginae
LCVA_247	247	gi|514589893|gb|EPI51404.1|	480	443	480	0	61.042	Gardnerella vaginalis JCP7672
LCVA_247	247	gi|514596519|gb|EPI57290.1|	480	443	480	0	61.042	Gardnerella vaginalis JCP7276
LCVA_248	248	gi|985293963|gb|KWZ79080.1|	345	354	350	1.12e-148	62.571	Anaerococcus tetradius
LCVA_248	248	gi|987325445|gb|KXB39262.1|	345	339	339	6.53e-136	60.767	Clostridiales bacterium KA00274
LCVA_248	248	gi|1001051363|gb|KXO16508.1|	345	348	349	1e-141	59.312	Clostridiales bacterium KA00134
LCVA_249	249	gi|987325444|gb|KXB39261.1|	71	66	62	1.55e-29	77.419	Clostridiales bacterium KA00274
LCVA_249	249	gi|985293964|gb|KWZ79081.1|	71	64	64	3.09e-31	76.562	Anaerococcus tetradius
LCVA_249	249	gi|690782513|gb|KGF29477.1|	71	64	64	2.62e-31	75	Peptoniphilus lacrimalis DNF00528
LCVA_250	250	WP_074716393.1	196	202	193	1.21e-63	50.777	Lachnobacterium_bovis
LCVA_250	250	SDY13518.1	196	202	193	1.21e-63	50.777	Lachnobacterium_bovis_DSM_14045
LCVA_250	250	gi|987354134|gb|KXB66824.1|	196	203	193	7.81e-48	40.933	Peptoniphilus coxii
LCVA_251	251	EGG81273.1	394	291	213	2.63e-43	36.62	Lachnospiraceae_bacterium_2_1_46FAA
LCVA_252	252	WP_006905774.1	227	230	221	8.4e-90	59.729	Shuttleworthia_satelles
LCVA_252	252	EEP29386.1	227	230	221	8.4e-90	59.729	Shuttleworthia_satelles
LCVA_252	252	WP_074718852.1	227	227	225	2.85e-81	55.111	Lachnobacterium_bovis
LCVA_253	253	gi|987335480|gb|KXB48887.1|	301	290	274	1.09e-72	40.146	Coriobacteriales bacterium DNF00809
LCVA_253	253	WP_074715916.1	301	335	282	8.17e-52	34.397	Lachnobacterium_bovis
LCVA_253	253	SDY00873.1	301	335	282	8.17e-52	34.397	Lachnobacterium_bovis_DSM_14045
LCVA_254	254	gi|985408151|gb|KXA69853.1|	187	210	187	9.03e-110	77.005	Megasphaera sp. MJR8396C
LCVA_254	254	gi|987344214|gb|KXB57370.1|	187	209	187	5.51e-110	75.936	Lachnoanaerobaculum saburreum
LCVA_254	254	gi|1331368546|gb|PNH20350.1|	187	187	187	1.33e-109	74.866	Lachnospiraceae bacterium
LCVA_255	255	gi|690765622|gb|KGF13677.1|	561	547	555	0	53.153	Atopobium parvulum DNF00906
LCVA_255	255	gi|987344215|gb|KXB57371.1|	561	536	557	0	52.244	Lachnoanaerobaculum saburreum
LCVA_255	255	gi|327490895|gb|EGF22673.1|	561	570	553	0	49.548	Atopobium vaginae DSM 15829
LCVA_256	256	WP_074716319.1	412	404	377	8.52e-74	38.992	Lachnobacterium_bovis
LCVA_256	256	SDY11715.1	412	404	377	8.52e-74	38.992	Lachnobacterium_bovis_DSM_14045
LCVA_256	256	EGG84698.1	412	365	370	3.22e-43	29.189	Lachnospiraceae_bacterium_2_1_46FAA
LCVA_257	257	WP_074716321.1	251	266	250	1.76e-73	42.4	Lachnobacterium_bovis
LCVA_257	257	SDY11741.1	251	266	250	1.76e-73	42.4	Lachnobacterium_bovis_DSM_14045
LCVA_257	257	EGG84699.1	251	251	249	3.37e-51	36.948	Lachnospiraceae_bacterium_2_1_46FAA
LCVA_258	258	gi|1757966404|gb|KAB1977358.1|	836	779	851	0	41.246	Lactobacillus crispatus
LCVA_258	258	gi|1596031251|gb|TDN16980.1|	836	779	846	0	40.662	Lactobacillus crispatus
LCVA_258	258	gi|1595974843|gb|TDM68586.1|	836	779	846	0	40.662	Lactobacillus crispatus
LCVA_261	261	gi|690758239|gb|KGF06853.1|	665	671	662	0	65.257	Tissierellia bacterium S7-1-4
LCVA_261	261	gi|987354748|gb|KXB67421.1|	665	667	668	0	64.521	Peptoniphilus coxii
LCVA_261	261	gi|690763413|gb|KGF11658.1|	665	665	673	0	64.19	Tissierellia bacterium S5-A11
LCVA_262	262	WP_074718589.1	306	317	306	1.04e-156	68.627	Lachnobacterium_bovis
LCVA_262	262	SDY63392.1	306	317	306	1.04e-156	68.627	Lachnobacterium_bovis_DSM_14045
LCVA_264	264	gi|987355033|gb|KXB67698.1|	370	445	387	1.56e-107	42.636	Parvimonas sp. KA00067
LCVA_264	264	gi|1446049210|gb|RDY20600.1|	370	452	388	4.6e-97	41.237	Criibacterium bergeronii
LCVA_264	264	gi|987347935|gb|KXB60851.1|	370	422	395	6.54e-95	39.747	Lachnoanaerobaculum saburreum
LCVA_267	267	WP_074718872.1	245	248	247	2.15e-71	46.559	Lachnobacterium_bovis
LCVA_267	267	SDY70641.1	245	248	247	2.15e-71	46.559	Lachnobacterium_bovis_DSM_14045
LCVA_267	267	EEP27580.1	245	249	247	7.02e-67	40.891	Shuttleworthia_satelles
LCVA_268	268	WP_006907253.1	305	302	302	9.83e-146	65.563	Shuttleworthia_satelles
LCVA_268	268	EEP27581.1	305	302	302	9.83e-146	65.563	Shuttleworthia_satelles
LCVA_268	268	WP_074718874.1	305	304	298	8.5e-134	62.081	Lachnobacterium_bovis
LCVA_269	269	WP_006907254.1	677	699	699	0	62.375	Shuttleworthia_satelles
LCVA_269	269	EEP27582.1	677	699	699	0	62.375	Shuttleworthia_satelles
LCVA_269	269	WP_074718876.1	677	681	685	0	61.022	Lachnobacterium_bovis
LCVA_270	270	gi|985306567|gb|KWZ91208.1|	85	86	82	1.25e-29	59.756	Bifidobacterium longum
LCVA_270	270	WP_006907256.1	85	85	85	6.29e-27	54.118	Shuttleworthia_satelles
LCVA_270	270	EEP27584.1	85	85	85	6.29e-27	54.118	Shuttleworthia_satelles
LCVA_272	272	gi|690767343|gb|KGF15256.1|	197	182	179	3.44e-57	52.514	Peptostreptococcus sp. MV1
LCVA_272	272	gi|1331369585|gb|PNH21375.1|	197	182	180	1.26e-57	48.889	Lachnospiraceae bacterium
LCVA_272	272	gi|985325231|gb|KXA09181.1|	197	183	180	8.35e-54	47.778	Clostridium perfringens
LCVA_273	273	gi|1331369584|gb|PNH21374.1|	198	190	197	9.96e-54	45.685	Lachnospiraceae bacterium
LCVA_273	273	gi|690767342|gb|KGF15255.1|	198	185	197	1.73e-45	41.117	Peptostreptococcus sp. MV1
LCVA_273	273	gi|987380748|gb|KXB92121.1|	198	187	201	1.51e-44	40.796	Veillonellaceae bacterium DNF00626
LCVA_274	274	WP_074718314.1	1072	1052	1071	0	70.868	Lachnobacterium_bovis
LCVA_274	274	SDY56599.1	1072	1052	1071	0	70.868	Lachnobacterium_bovis_DSM_14045
LCVA_274	274	EEP29390.1	1072	1065	1086	0	66.851	Shuttleworthia_satelles
LCVA_275	275	WP_049921658.1	281	305	222	8e-39	38.739	Shuttleworthia_satelles
LCVA_275	275	EEP27752.1	281	315	222	1.21e-38	38.739	Shuttleworthia_satelles
LCVA_275	275	WP_074717382.1	281	282	145	4.81e-23	33.793	Lachnobacterium_bovis
LCVA_277	277	EGG81266.1	1169	1157	1165	0	57.94	Lachnospiraceae_bacterium_2_1_46FAA
LCVA_277	277	gi|1331366692|gb|PNH18504.1|	1169	1155	1161	0	55.125	Lachnospiraceae bacterium
LCVA_277	277	gi|987340655|gb|KXB53943.1|	1169	1152	1162	0	54.475	Lachnoanaerobaculum saburreum
LCVA_278	278	WP_006906741.1	323	324	322	0	74.224	Shuttleworthia_satelles
LCVA_278	278	EEP27750.1	323	324	322	0	74.224	Shuttleworthia_satelles
LCVA_278	278	gi|987347133|gb|KXB60079.1|	323	322	320	1.65e-163	70.938	Lachnoanaerobaculum saburreum
LCVA_279	279	WP_006906739.1	286	278	280	1.12e-85	46.429	Shuttleworthia_satelles
LCVA_279	279	EEP27748.1	286	278	280	1.12e-85	46.429	Shuttleworthia_satelles
LCVA_279	279	EGG82446.1	286	257	280	2.15e-83	43.571	Lachnospiraceae_bacterium_2_1_46FAA
LCVA_280	280	EGG80845.1	87	87	85	2.17e-34	64.706	Lachnospiraceae_bacterium_2_1_46FAA
LCVA_280	280	WP_074718293.1	87	88	87	3.43e-33	56.322	Lachnobacterium_bovis
LCVA_280	280	SDY56290.1	87	88	87	3.43e-33	56.322	Lachnobacterium_bovis_DSM_14045
LCVA_281	281	WP_083354525.1	244	280	205	7.88e-107	68.293	Lachnobacterium_bovis
LCVA_281	281	SDY56260.1	244	280	205	7.88e-107	68.293	Lachnobacterium_bovis_DSM_14045
LCVA_281	281	EGG80848.1	244	239	205	3.11e-106	67.805	Lachnospiraceae_bacterium_2_1_46FAA
LCVA_282	282	gi|987339803|gb|KXB53106.1|	449	446	425	3.15e-119	45.176	Coriobacteriales bacterium DNF00809
LCVA_282	282	WP_006905980.1	449	447	445	2.44e-120	42.697	Shuttleworthia_satelles
LCVA_282	282	EEP28161.1	449	447	445	2.44e-120	42.697	Shuttleworthia_satelles
LCVA_283	283	gi|987332994|gb|KXB46533.1|	494	490	493	0	61.46	Tissierellia bacterium KA00581
LCVA_283	283	gi|987329959|gb|KXB43624.1|	494	495	495	0	61.212	Tissierellia bacterium KA00581
LCVA_283	283	gi|987354066|gb|KXB66760.1|	494	499	501	0	60.679	Parvimonas sp. KA00067
LCVA_284	284	WP_006906660.1	782	773	648	0	66.667	Shuttleworthia_satelles
LCVA_284	284	EEP27671.1	782	773	648	0	66.667	Shuttleworthia_satelles
LCVA_284	284	WP_143470214.1	782	750	626	0	64.856	Lachnobacterium_bovis
LCVA_285	285	WP_074716743.1	619	623	620	0	60.161	Lachnobacterium_bovis
LCVA_285	285	SDY20991.1	619	623	620	0	60.161	Lachnobacterium_bovis_DSM_14045
LCVA_285	285	EGG85383.1	619	613	613	0	59.217	Lachnospiraceae_bacterium_2_1_46FAA
LCVA_286	286	WP_074716741.1	312	313	307	4.13e-141	63.844	Lachnobacterium_bovis
LCVA_286	286	WP_006906658.1	312	312	306	1.22e-141	63.725	Shuttleworthia_satelles
LCVA_286	286	EEP27669.1	312	312	306	1.22e-141	63.725	Shuttleworthia_satelles
LCVA_287	287	gi|987360476|gb|KXB72826.1|	305	306	302	1.74e-95	49.669	Peptostreptococcus anaerobius
LCVA_287	287	EEP27667.1	305	297	293	4.53e-94	47.782	Shuttleworthia_satelles
LCVA_287	287	WP_045000852.1	305	302	304	5.94e-94	46.053	Shuttleworthia_satelles
LCVA_288	288	WP_006906655.1	291	291	289	4.28e-124	60.554	Shuttleworthia_satelles
LCVA_288	288	EEP27666.1	291	291	289	4.28e-124	60.554	Shuttleworthia_satelles
LCVA_288	288	WP_074716737.1	291	289	287	9.21e-120	59.233	Lachnobacterium_bovis
LCVA_289	289	WP_006906654.1	301	293	238	4.8e-63	41.176	Shuttleworthia_satelles
LCVA_289	289	EEP27665.1	301	293	238	4.8e-63	41.176	Shuttleworthia_satelles
LCVA_289	289	EGG82280.1	301	320	317	1.35e-61	38.486	Lachnospiraceae_bacterium_2_1_46FAA
LCVA_290	290	WP_006906653.1	83	85	84	8.74e-24	52.381	Shuttleworthia_satelles
LCVA_290	290	EEP27664.1	83	85	84	8.74e-24	52.381	Shuttleworthia_satelles
LCVA_290	290	gi|987345550|gb|KXB58585.1|	83	87	82	2.73e-13	43.902	Gemella asaccharolytica
LCVA_291	291	EGG82278.1	303	311	300	3.59e-111	52.667	Lachnospiraceae_bacterium_2_1_46FAA
LCVA_291	291	WP_074716733.1	303	326	296	8.52e-116	52.365	Lachnobacterium_bovis
LCVA_291	291	SDY20824.1	303	326	296	8.52e-116	52.365	Lachnobacterium_bovis_DSM_14045
LCVA_292	292	WP_074716731.1	287	289	287	1.19e-154	72.474	Lachnobacterium_bovis
LCVA_292	292	SDY20799.1	287	289	287	1.19e-154	72.474	Lachnobacterium_bovis_DSM_14045
LCVA_292	292	gi|987340230|gb|KXB53527.1|	287	287	287	5.56e-151	71.08	Lachnoanaerobaculum saburreum
LCVA_293	293	EEP27660.1	704	739	698	0	66.762	Shuttleworthia_satelles
LCVA_293	293	WP_074716729.1	704	707	705	0	65.532	Lachnobacterium_bovis
LCVA_293	293	SDY20780.1	704	707	705	0	65.532	Lachnobacterium_bovis_DSM_14045
LCVA_295	295	WP_006906648.1	913	863	865	0	54.682	Shuttleworthia_satelles
LCVA_295	295	EEP27659.1	913	863	865	0	54.682	Shuttleworthia_satelles
LCVA_295	295	WP_074716725.1	913	863	847	0	51.476	Lachnobacterium_bovis
LCVA_296	296	WP_074716723.1	217	212	172	6.44e-41	41.86	Lachnobacterium_bovis
LCVA_296	296	SDY20700.1	217	212	172	6.44e-41	41.86	Lachnobacterium_bovis_DSM_14045
LCVA_296	296	gi|985408273|gb|KXA69959.1|	217	224	185	4.08e-40	37.297	Megasphaera sp. MJR8396C
LCVA_298	298	EGG81269.1	269	237	204	5.17e-30	31.373	Lachnospiraceae_bacterium_2_1_46FAA
LCVA_298	298	WP_006906645.1	269	245	207	7.99e-37	28.502	Shuttleworthia_satelles
LCVA_298	298	EEP27656.1	269	245	207	7.99e-37	28.502	Shuttleworthia_satelles
LCVA_299	299	WP_074716719.1	306	277	277	3.29e-111	58.123	Lachnobacterium_bovis
LCVA_299	299	SDY20638.1	306	277	277	3.29e-111	58.123	Lachnobacterium_bovis_DSM_14045
LCVA_299	299	EEP27655.1	306	282	279	3.21e-110	55.197	Shuttleworthia_satelles
LCVA_300	300	gi|1446050538|gb|RDY21904.1|	65	61	65	0.000171	30.769	Criibacterium bergeronii
LCVA_300	300	WP_074716715.1	65	69	75	0.011	26.667	Lachnobacterium_bovis
LCVA_300	300	SDY20574.1	65	69	75	0.011	26.667	Lachnobacterium_bovis_DSM_14045
LCVA_301	301	gi|1331368727|gb|PNH20524.1|	307	313	304	2.94e-91	49.342	Lachnospiraceae bacterium
LCVA_301	301	gi|1249067621|gb|PCN58874.1|	307	302	299	4.76e-91	48.829	Clostridioides difficile
LCVA_301	301	gi|690760337|gb|KGF08775.1|	307	306	302	3.13e-96	47.351	Clostridiales bacterium S5-A14a
LCVA_302	302	WP_006906642.1	430	408	421	2.81e-66	35.629	Shuttleworthia_satelles
LCVA_302	302	EEP27653.1	430	408	421	2.81e-66	35.629	Shuttleworthia_satelles
LCVA_302	302	WP_083354542.1	430	362	309	8.1e-50	35.599	Lachnobacterium_bovis
LCVA_303	303	EGG81503.1	362	361	358	6.61e-137	57.263	Lachnospiraceae_bacterium_2_1_46FAA
LCVA_303	303	WP_045000843.1	362	362	362	5.98e-142	57.182	Shuttleworthia_satelles
LCVA_303	303	EEP27651.1	362	378	362	5.32e-142	57.182	Shuttleworthia_satelles
LCVA_304	304	WP_074716707.1	224	228	220	1.02e-109	70.455	Lachnobacterium_bovis
LCVA_304	304	SDY20460.1	224	228	220	1.02e-109	70.455	Lachnobacterium_bovis_DSM_14045
LCVA_304	304	EEP27650.1	224	228	218	7.15e-106	64.22	Shuttleworthia_satelles
LCVA_305	305	WP_006906638.1	281	296	281	4.97e-127	59.786	Shuttleworthia_satelles
LCVA_305	305	EEP27649.1	281	296	281	4.97e-127	59.786	Shuttleworthia_satelles
LCVA_305	305	EGG81501.1	281	292	281	1.23e-109	56.584	Lachnospiraceae_bacterium_2_1_46FAA
LCVA_306	306	WP_006906637.1	425	459	353	4.43e-92	44.193	Shuttleworthia_satelles
LCVA_306	306	EEP27648.1	425	459	353	4.43e-92	44.193	Shuttleworthia_satelles
LCVA_306	306	gi|987346139|gb|KXB59139.1|	425	438	433	2.16e-86	38.568	Lachnoanaerobaculum saburreum
LCVA_307	307	WP_049906901.1	379	378	370	0	68.919	Shuttleworthia_satelles
LCVA_307	307	EEP27647.1	379	379	370	0	68.649	Shuttleworthia_satelles
LCVA_307	307	WP_074716703.1	379	370	369	0	68.022	Lachnobacterium_bovis
LCVA_308	308	EGG80237.1	189	168	188	2.1e-16	27.128	Lachnospiraceae_bacterium_2_1_46FAA
LCVA_308	308	WP_074716395.1	189	169	184	4.43e-18	25.543	Lachnobacterium_bovis
LCVA_308	308	SDY13548.1	189	169	184	4.43e-18	25.543	Lachnobacterium_bovis_DSM_14045
LCVA_309	309	WP_074716397.1	148	142	141	2.78e-58	63.83	Lachnobacterium_bovis
LCVA_309	309	SDY13579.1	148	142	141	2.78e-58	63.83	Lachnobacterium_bovis_DSM_14045
LCVA_309	309	EGG80236.1	148	142	139	5.37e-52	56.835	Lachnospiraceae_bacterium_2_1_46FAA
LCVA_310	310	WP_074716399.1	246	246	245	2.08e-81	48.571	Lachnobacterium_bovis
LCVA_310	310	SDY13611.1	246	246	245	2.08e-81	48.571	Lachnobacterium_bovis_DSM_14045
LCVA_310	310	EGG80235.1	246	240	241	1.72e-79	48.133	Lachnospiraceae_bacterium_2_1_46FAA
LCVA_311	311	gi|690756460|gb|KGF05276.1|	157	145	147	1.49e-28	38.776	Anaerococcus lactolyticus S7-1-13
LCVA_311	311	WP_074716401.1	157	144	147	5.9e-25	36.735	Lachnobacterium_bovis
LCVA_311	311	SDY13637.1	157	144	147	5.9e-25	36.735	Lachnobacterium_bovis_DSM_14045
LCVA_312	312	WP_074716403.1	302	303	302	7.97e-149	64.238	Lachnobacterium_bovis
LCVA_312	312	SDY13669.1	302	303	302	7.97e-149	64.238	Lachnobacterium_bovis_DSM_14045
LCVA_312	312	gi|1331366335|gb|PNH18149.1|	302	303	302	3.03e-138	58.609	Lachnospiraceae bacterium
LCVA_313	313	WP_074716405.1	195	193	184	6.88e-43	40.761	Lachnobacterium_bovis
LCVA_313	313	SDY13702.1	195	193	184	6.88e-43	40.761	Lachnobacterium_bovis_DSM_14045
LCVA_314	314	EGG80231.1	333	342	333	5.87e-160	64.264	Lachnospiraceae_bacterium_2_1_46FAA
LCVA_314	314	WP_006906627.1	333	343	329	1.92e-157	62.918	Shuttleworthia_satelles
LCVA_314	314	EEP27638.1	333	343	329	1.92e-157	62.918	Shuttleworthia_satelles
LCVA_315	315	WP_074716409.1	231	246	240	1.46e-55	43.75	Lachnobacterium_bovis
LCVA_315	315	SDY13763.1	231	246	240	1.46e-55	43.75	Lachnobacterium_bovis_DSM_14045
LCVA_315	315	EGG80230.1	231	235	227	1.59e-51	40.529	Lachnospiraceae_bacterium_2_1_46FAA
LCVA_318	318	gi|1331365205|gb|PNH17044.1|	198	195	168	2.05e-33	35.714	Lactobacillus iners
LCVA_318	318	gi|1446049844|gb|RDY21217.1|	198	197	195	2.15e-35	34.872	Criibacterium bergeronii
LCVA_318	318	gi|985327275|gb|KXA11100.1|	198	195	191	1.9e-33	33.508	Finegoldia magna
LCVA_319	319	gi|987325915|gb|KXB39720.1|	240	236	241	4.13e-32	34.025	Clostridiales bacterium KA00274
LCVA_319	319	gi|985404847|gb|KXA66888.1|	240	242	240	8.95e-32	32.083	Megasphaera sp. MJR8396C
LCVA_320	320	gi|1249066516|gb|PCN57788.1|	444	392	383	1e-89	39.164	Clostridioides difficile
LCVA_320	320	gi|985320667|gb|KXA04857.1|	444	393	381	3.96e-90	39.108	Clostridium perfringens
LCVA_320	320	EGG81270.1	444	391	381	9.56e-85	36.22	Lachnospiraceae_bacterium_2_1_46FAA
LCVA_321	321	gi|327491813|gb|EGF23587.1|	90	88	74	2.25e-27	64.865	Atopobium vaginae DSM 15829
LCVA_321	321	gi|987345314|gb|KXB58373.1|	90	84	83	4.47e-26	50.602	Lachnoanaerobaculum saburreum
LCVA_321	321	gi|987346200|gb|KXB59200.1|	90	85	86	1.02e-25	50	Lachnoanaerobaculum saburreum
LCVA_323	323	gi|1333051633|gb|PNP90701.1|	168	455	172	4.59e-47	45.93	Gardnerella sp. DNF01162
LCVA_323	323	gi|297533252|gb|EFH72136.1|	168	446	172	3.53e-47	45.93	Gardnerella vaginalis 5-1
LCVA_323	323	gi|1334003866|gb|PNS43160.1|	168	455	172	4.21e-47	45.93	Gardnerella vaginalis
LCVA_326	326	gi|1249066901|gb|PCN58168.1|	158	151	145	6.89e-26	36.552	Clostridioides difficile
LCVA_326	326	gi|1249066634|gb|PCN57905.1|	158	150	148	1.01e-23	35.811	Clostridioides difficile
LCVA_326	326	gi|987351102|gb|KXB63895.1|	158	172	151	2.6e-20	27.815	Olsenella sp. DNF00959
LCVA_327	327	gi|1249066902|gb|PCN58169.1|	105	105	103	9.64e-49	70.874	Clostridioides difficile
LCVA_327	327	gi|1131734253|gb|OLY57402.1|	562	105	141	2.06e-44	62.857	Escherichia coli
LCVA_327	327	gi|1357793221|gb|PRP02817.1|	562	105	141	2.2e-44	62.857	Escherichia coli
LCVA_328	328	gi|1249066903|gb|PCN58170.1|	408	420	416	0	65.144	Clostridioides difficile
LCVA_328	328	gi|985316667|gb|KXA01014.1|	545	408	419	1.57e-144	53.641	Citrobacter koseri
LCVA_328	328	gi|985307981|gb|KWZ92597.1|	546	408	417	1.03e-143	53.155	Citrobacter freundii
LCVA_329	329	gi|1249066637|gb|PCN57908.1|	903	892	880	4.99e-175	36.023	Clostridioides difficile
LCVA_329	329	gi|998235083|gb|KXI13857.1|	903	888	897	2.91e-170	35.229	Streptococcus pasteurianus
LCVA_329	329	gi|985318102|gb|KXA02402.1|	545	903	457	1.31e-146	29.989	Citrobacter koseri
LCVA_330	330	gi|987335107|gb|KXB48539.1|	254	241	240	6.01e-129	73.333	Tissierellia bacterium KA00581
LCVA_330	330	gi|987353643|gb|KXB66352.1|	254	241	241	1.64e-127	72.199	Parvimonas sp. KA00067
LCVA_330	330	gi|985293463|gb|KWZ78629.1|	254	240	239	9.36e-94	56.904	Anaerococcus tetradius
LCVA_331	331	gi|987335108|gb|KXB48540.1|	589	565	582	7.89e-106	37.973	Tissierellia bacterium KA00581
LCVA_331	331	gi|987353642|gb|KXB66351.1|	589	566	581	2.5e-102	35.284	Parvimonas sp. KA00067
LCVA_332	332	WP_074715986.1	519	270	141	3.83e-56	65.248	Lachnobacterium_bovis
LCVA_332	332	WP_074715988.1	519	270	141	1.23e-54	65.248	Lachnobacterium_bovis
LCVA_332	332	SDY02180.1	519	270	141	3.83e-56	65.248	Lachnobacterium_bovis_DSM_14045
LCVA_333	333	gi|985314831|gb|KWZ99207.1|	509	509	495	0	60.404	Anaerococcus hydrogenalis
LCVA_333	333	gi|985333094|gb|KXA16569.1|	509	503	501	0	58.084	Fusobacterium equinum
LCVA_333	333	gi|985336587|gb|KXA19836.1|	851	509	574	0	57.738	Fusobacterium nucleatum
LCVA_334	334	gi|987353111|gb|KXB65844.1|	609	607	610	0	50.656	Parvimonas sp. KA00067
LCVA_334	334	gi|985288181|gb|KWZ73681.1|	609	623	612	0	50	Alloscardovia omnicolens
LCVA_334	334	gi|326407817|gb|ADZ64888.1|	609	625	615	0	45.691	Lactococcus lactis subsp. lactis CV56
LCVA_335	335	WP_074716895.1	341	339	336	9.44e-158	66.071	Lachnobacterium_bovis
LCVA_335	335	SDY24489.1	341	339	336	9.44e-158	66.071	Lachnobacterium_bovis_DSM_14045
LCVA_335	335	EEP29170.1	341	338	333	7.2e-157	64.264	Shuttleworthia_satelles
LCVA_336	336	WP_074716893.1	600	592	600	1.09e-176	45	Lachnobacterium_bovis
LCVA_336	336	SDY24460.1	600	592	600	1.09e-176	45	Lachnobacterium_bovis_DSM_14045
LCVA_336	336	EEP29169.1	600	649	649	4.85e-171	39.908	Shuttleworthia_satelles
LCVA_337	337	EGG79356.1	413	370	369	1.32e-172	68.564	Lachnospiraceae_bacterium_2_1_46FAA
LCVA_337	337	WP_074716891.1	413	426	408	4.35e-178	65.441	Lachnobacterium_bovis
LCVA_337	337	SDY24427.1	413	426	408	4.35e-178	65.441	Lachnobacterium_bovis_DSM_14045
LCVA_338	338	WP_074716956.1	271	240	237	1.33e-43	36.709	Lachnobacterium_bovis
LCVA_338	338	SDY24396.1	271	247	260	3.32e-44	35	Lachnobacterium_bovis_DSM_14045
LCVA_338	338	WP_045000142.1	271	235	242	1.94e-43	32.231	Shuttleworthia_satelles
LCVA_339	339	EGG79358.1	291	258	282	7.27e-70	39.362	Lachnospiraceae_bacterium_2_1_46FAA
LCVA_339	339	WP_006905554.1	291	282	291	3.68e-73	38.488	Shuttleworthia_satelles
LCVA_339	339	EEP29166.1	291	282	291	3.68e-73	38.488	Shuttleworthia_satelles
LCVA_340	340	WP_074716889.1	555	555	539	0	56.401	Lachnobacterium_bovis
LCVA_340	340	SDY24370.1	555	555	539	0	56.401	Lachnobacterium_bovis_DSM_14045
LCVA_340	340	EEP29165.1	555	587	558	0	50.179	Shuttleworthia_satelles
LCVA_341	341	WP_074717632.1	304	272	272	1.22e-40	35.662	Lachnobacterium_bovis
LCVA_341	341	SDY41244.1	304	272	272	1.22e-40	35.662	Lachnobacterium_bovis_DSM_14045
LCVA_341	341	EGG81790.1	304	281	274	6.21e-41	29.927	Lachnospiraceae_bacterium_2_1_46FAA
LCVA_342	342	WP_006905632.1	748	744	746	0	48.391	Shuttleworthia_satelles
LCVA_342	342	EEP29244.1	748	744	746	0	48.391	Shuttleworthia_satelles
LCVA_342	342	WP_074717613.1	748	743	744	0	47.849	Lachnobacterium_bovis
LCVA_343	343	WP_006905630.1	163	160	162	5.47e-60	57.407	Shuttleworthia_satelles
LCVA_343	343	EEP29243.1	163	160	162	5.47e-60	57.407	Shuttleworthia_satelles
LCVA_343	343	EGG83170.1	163	157	159	1.54e-56	55.975	Lachnospiraceae_bacterium_2_1_46FAA
LCVA_344	344	WP_074717609.1	319	311	306	4.92e-121	54.902	Lachnobacterium_bovis
LCVA_344	344	SDY40854.1	319	311	306	4.92e-121	54.902	Lachnobacterium_bovis_DSM_14045
LCVA_344	344	EEP29241.1	319	340	338	6.15e-111	47.041	Shuttleworthia_satelles
LCVA_345	345	gi|1331369595|gb|PNH21385.1|	237	242	207	6.87e-79	54.589	Lachnospiraceae bacterium
LCVA_345	345	EGG83168.1	237	235	233	2.66e-79	53.219	Lachnospiraceae_bacterium_2_1_46FAA
LCVA_345	345	gi|985331070|gb|KXA14643.1|	237	231	233	4.75e-79	52.79	Clostridium perfringens
LCVA_346	346	WP_006905628.1	424	429	427	8.9e-102	39.578	Shuttleworthia_satelles
LCVA_346	346	EEP29240.1	424	429	427	8.9e-102	39.578	Shuttleworthia_satelles
LCVA_346	346	WP_074719126.1	424	442	427	2.83e-93	38.407	Lachnobacterium_bovis
LCVA_347	347	WP_045000168.1	343	355	339	7.04e-159	62.537	Shuttleworthia_satelles
LCVA_347	347	WP_074719128.1	343	348	341	2.19e-163	62.463	Lachnobacterium_bovis
LCVA_347	347	SDY77619.1	343	348	341	2.19e-163	62.463	Lachnobacterium_bovis_DSM_14045
LCVA_348	348	WP_074719130.1	240	247	239	2.5e-82	51.883	Lachnobacterium_bovis
LCVA_348	348	SDY77645.1	240	247	239	2.5e-82	51.883	Lachnobacterium_bovis_DSM_14045
LCVA_348	348	EGG83165.1	240	246	239	5.56e-78	47.699	Lachnospiraceae_bacterium_2_1_46FAA
LCVA_349	349	WP_006905625.1	629	661	596	0	51.678	Shuttleworthia_satelles
LCVA_349	349	EEP29237.1	629	661	596	0	51.678	Shuttleworthia_satelles
LCVA_349	349	WP_074719132.1	629	687	623	5.41e-174	47.833	Lachnobacterium_bovis
LCVA_350	350	WP_074719134.1	288	292	292	6.18e-102	51.027	Lachnobacterium_bovis
LCVA_350	350	SDY77699.1	288	292	292	6.18e-102	51.027	Lachnobacterium_bovis_DSM_14045
LCVA_350	350	EGG83163.1	288	292	292	7.34e-95	50.342	Lachnospiraceae_bacterium_2_1_46FAA
LCVA_351	351	WP_074719136.1	216	216	215	1.58e-95	61.395	Lachnobacterium_bovis
LCVA_351	351	SDY77726.1	216	216	215	1.58e-95	61.395	Lachnobacterium_bovis_DSM_14045
LCVA_351	351	EEP29235.1	216	216	215	1.43e-93	59.07	Shuttleworthia_satelles
LCVA_352	352	WP_074719138.1	228	218	232	2.77e-38	36.638	Lachnobacterium_bovis
LCVA_352	352	SDY77750.1	228	218	232	2.77e-38	36.638	Lachnobacterium_bovis_DSM_14045
LCVA_352	352	EGG83161.1	228	219	227	3.24e-36	32.159	Lachnospiraceae_bacterium_2_1_46FAA
LCVA_353	353	EEP29223.1	365	365	365	0	76.164	Shuttleworthia_satelles
LCVA_353	353	WP_074719232.1	365	365	365	0	75.89	Lachnobacterium_bovis
LCVA_353	353	SDY82013.1	365	365	365	0	75.89	Lachnobacterium_bovis_DSM_14045
LCVA_354	354	WP_074719233.1	149	149	149	1.07e-78	73.154	Lachnobacterium_bovis
LCVA_354	354	SDY82043.1	149	149	149	1.07e-78	73.154	Lachnobacterium_bovis_DSM_14045
LCVA_354	354	EGG80972.1	149	150	147	5.6e-77	70.748	Lachnospiraceae_bacterium_2_1_46FAA
LCVA_356	356	EGG84021.1	176	166	159	1.69e-53	54.717	Lachnospiraceae_bacterium_2_1_46FAA
LCVA_356	356	WP_083354578.1	176	172	162	1.02e-52	52.469	Lachnobacterium_bovis
LCVA_356	356	SDY82103.1	176	168	162	8.1e-53	52.469	Lachnobacterium_bovis_DSM_14045
LCVA_357	357	WP_006905609.1	150	153	146	4.92e-67	69.863	Shuttleworthia_satelles
LCVA_357	357	EEP29221.1	150	153	146	4.92e-67	69.863	Shuttleworthia_satelles
LCVA_357	357	EGG82289.1	150	146	146	1.53e-67	63.014	Lachnospiraceae_bacterium_2_1_46FAA
LCVA_358	358	WP_006905608.1	185	185	184	8.92e-105	75	Shuttleworthia_satelles
LCVA_358	358	EEP29220.1	185	185	184	8.92e-105	75	Shuttleworthia_satelles
LCVA_358	358	EGG84020.1	185	185	184	6.77e-102	72.283	Lachnospiraceae_bacterium_2_1_46FAA
LCVA_359	359	gi|987347368|gb|KXB60303.1|	316	327	314	1.26e-83	42.038	Gemella haemolysans
LCVA_359	359	gi|1673264767|emb|VTS34092.1|	316	331	300	9.91e-70	39	Staphylococcus pseudintermedius
LCVA_359	359	gi|987345824|gb|KXB58846.1|	316	326	313	2.17e-71	38.658	Gemella asaccharolytica
LCVA_360	360	WP_074716087.1	236	214	175	5.07e-06	29.714	Lachnobacterium_bovis
LCVA_360	360	SDY05590.1	236	214	175	5.07e-06	29.714	Lachnobacterium_bovis_DSM_14045
LCVA_361	361	WP_074715252.1	273	272	259	1.96e-61	40.154	Lachnobacterium_bovis
LCVA_361	361	SDX87759.1	273	272	259	1.96e-61	40.154	Lachnobacterium_bovis_DSM_14045
LCVA_362	362	WP_074715245.1	124	125	109	5.29e-33	52.294	Lachnobacterium_bovis
LCVA_362	362	SDX87689.1	124	125	109	5.29e-33	52.294	Lachnobacterium_bovis_DSM_14045
LCVA_362	362	gi|1249065943|gb|PCN57221.1|	124	120	112	1.18e-22	41.964	Clostridioides difficile
LCVA_363	363	WP_074715247.1	293	300	296	5.23e-85	42.905	Lachnobacterium_bovis
LCVA_363	363	SDX87712.1	293	300	296	5.23e-85	42.905	Lachnobacterium_bovis_DSM_14045
LCVA_364	364	gi|987333047|gb|KXB46584.1|	351	330	350	4.62e-110	50.286	Tissierellia bacterium KA00581
LCVA_364	364	gi|987347657|gb|KXB60578.1|	351	349	350	1.52e-57	36.286	Lachnoanaerobaculum saburreum
LCVA_364	364	gi|987357763|gb|KXB70258.1|	351	342	354	2.26e-56	35.311	Leptotrichia wadei
LCVA_366	366	gi|998232481|gb|KXI11422.1|	152	262	75	6.13e-23	53.333	Peptostreptococcus anaerobius
LCVA_366	366	gi|987348220|gb|KXB61113.1|	152	224	75	4.95e-20	48	Gemella haemolysans
LCVA_366	366	gi|987345750|gb|KXB58777.1|	152	218	75	3.97e-21	46.667	Gemella haemolysans
LCVA_367	367	gi|998232480|gb|KXI11421.1|	69	69	68	8.07e-18	51.471	Peptostreptococcus anaerobius
LCVA_367	367	WP_006906060.1	69	68	68	4.88e-14	38.235	Shuttleworthia_satelles
LCVA_367	367	EEP28241.1	69	68	68	4.88e-14	38.235	Shuttleworthia_satelles
LCVA_368	368	gi|987333055|gb|KXB46592.1|	130	116	127	1.39e-19	39.37	Tissierellia bacterium KA00581
LCVA_370	370	gi|1446050028|gb|RDY21398.1|	224	205	208	2.96e-52	42.788	Criibacterium bergeronii
LCVA_371	371	gi|690790165|gb|KGF36630.1|	64	213	42	0.11	42.857	Prevotella buccalis DNF00853
LCVA_371	371	gi|1333056141|gb|PNP95156.1|	64	213	42	0.11	42.857	Prevotella timonensis
LCVA_371	371	gi|690794500|gb|KGF40576.1|	64	213	50	0.093	36	Prevotella buccalis DNF00985
LCVA_371	371	gi|693279507|gb|KGI22796.1|	64	213	50	0.096	36	Prevotella timonensis S9-PR14
LCVA_373	373	gi|1446050030|gb|RDY21400.1|	130	150	132	3.95e-40	51.515	Criibacterium bergeronii
LCVA_375	375	gi|987355341|gb|KXB67987.1|	219	220	209	2.97e-42	40.191	Leptotrichia wadei
LCVA_377	377	gi|690802559|gb|KGF47771.1|	302	294	231	1.9e-56	43.29	Veillonella montpellierensis DNF00314
LCVA_377	377	gi|985323039|gb|KXA07114.1|	302	296	263	2.42e-53	40.304	Enterococcus faecium
LCVA_377	377	gi|987345076|gb|KXB58150.1|	302	323	281	1.65e-49	35.943	Lachnoanaerobaculum saburreum
LCVA_378	378	gi|1446049339|gb|RDY20724.1|	132	125	120	1.55e-28	45.833	Criibacterium bergeronii
LCVA_380	380	gi|987353426|gb|KXB66147.1|	85	75	74	2.34e-10	40.541	Parvimonas sp. KA00067
LCVA_380	380	gi|985329221|gb|KXA12934.1|	851	85	43.5	2.64e-06	37.705	Fusobacterium nucleatum
LCVA_381	381	gi|987353427|gb|KXB66148.1|	185	228	116	5.62e-23	42.241	Parvimonas sp. KA00067
LCVA_381	381	gi|985329222|gb|KXA12935.1|	851	185	118	1.14e-32	35.176	Fusobacterium nucleatum
LCVA_383	383	gi|998239816|gb|KXI18367.1|	64	142	50	0.053	32	Gardnerella vaginalis
LCVA_383	383	gi|514583625|gb|EPI45834.1|	64	142	55	0.048	30.909	Gardnerella vaginalis JCP8108
LCVA_383	383	gi|514595223|gb|EPI56081.1|	64	142	63	0.06	26.984	Mycoplasma_canis_UF33
LCVA_386	386	gi|668902698|gb|KFC36388.1|	454	417	431	8.84e-89	37.123	Lactobacillus rhamnosus K32
LCVA_386	386	EGG83536.1	454	441	431	1.59e-37	29.698	Lachnospiraceae_bacterium_2_1_46FAA
LCVA_390	390	EGG83532.1	206	182	192	4.84e-30	38.542	Lachnospiraceae_bacterium_2_1_46FAA
LCVA_391	391	gi|1604463087|gb|TFF68356.1|	288	296	285	1.81e-64	42.105	Helcococcus ovis
LCVA_391	391	EGG83531.1	288	284	287	2.08e-63	40.767	Lachnospiraceae_bacterium_2_1_46FAA
LCVA_392	392	gi|384393126|gb|EIE39577.1|	37	788	17	1.3	64.706	Mycoplasma canis UF31
LCVA_395	395	gi|1331366889|gb|PNH18700.1|	116	126	81	2.95e-19	54.321	Lachnospiraceae bacterium
LCVA_395	395	gi|985312044|gb|KWZ96486.1|	116	116	111	2.19e-27	45.946	Anaerococcus hydrogenalis
LCVA_395	395	gi|987333089|gb|KXB46626.1|	116	115	92	1.56e-15	40.217	Tissierellia bacterium KA00581
LCVA_404	404	gi|987345479|gb|KXB58515.1|	140	136	129	7.18e-57	63.566	Lachnoanaerobaculum saburreum
LCVA_404	404	gi|987347713|gb|KXB60634.1|	140	142	137	9.35e-59	62.774	Lachnoanaerobaculum saburreum
LCVA_404	404	gi|1539874604|emb|VEF36243.1|	140	137	141	5.62e-20	36.17	Lactobacillus acidophilus
LCVA_405	405	gi|690801764|gb|KGF47029.1|	48	330	36	1.56e-15	88.889	Veillonella montpellierensis DNF00314
LCVA_405	405	gi|987381987|gb|KXB93291.1|	48	330	36	2.66e-15	86.111	Veillonellaceae bacterium DNF00626
LCVA_405	405	gi|987378999|gb|KXB90444.1|	48	330	36	2.86e-15	86.111	Veillonellaceae bacterium DNF00751
LCVA_407	407	WP_074715988.1	485	270	138	1.4e-54	65.942	Lachnobacterium_bovis
LCVA_407	407	WP_074715986.1	485	270	187	1.01e-56	55.08	Lachnobacterium_bovis
LCVA_407	407	SDY02180.1	485	270	187	1.01e-56	55.08	Lachnobacterium_bovis_DSM_14045
LCVA_408	408	WP_074715986.1	504	270	138	5.36e-56	65.942	Lachnobacterium_bovis
LCVA_408	408	WP_074715988.1	504	270	138	1.45e-54	65.942	Lachnobacterium_bovis
LCVA_408	408	SDY02180.1	504	270	138	5.36e-56	65.942	Lachnobacterium_bovis_DSM_14045
LCVA_409	409	WP_074715988.1	507	270	141	3.58e-55	65.248	Lachnobacterium_bovis
LCVA_409	409	WP_074715986.1	507	270	204	1.67e-57	51.471	Lachnobacterium_bovis
LCVA_409	409	SDY02180.1	507	270	204	1.67e-57	51.471	Lachnobacterium_bovis_DSM_14045
LCVA_410	410	gi|690762302|gb|KGF10625.1|	335	329	331	4.96e-103	47.13	Peptostreptococcus sp. MV1
LCVA_410	410	gi|987357327|gb|KXB69848.1|	335	329	332	7.44e-97	45.783	Peptostreptococcus anaerobius
LCVA_410	410	gi|690783883|gb|KGF30765.1|	335	328	337	1.55e-62	37.389	Peptoniphilus lacrimalis DNF00528
LCVA_411	411	gi|987357328|gb|KXB69849.1|	428	428	428	0	74.299	Peptostreptococcus anaerobius
LCVA_411	411	gi|690762301|gb|KGF10624.1|	428	429	429	0	73.427	Peptostreptococcus sp. MV1
LCVA_411	411	gi|987369207|gb|KXB81068.1|	428	442	443	1.24e-66	32.957	Varibaculum cambriense
LCVA_412	412	gi|690762300|gb|KGF10623.1|	281	290	281	3.16e-175	82.562	Peptostreptococcus sp. MV1
LCVA_412	412	gi|987357329|gb|KXB69850.1|	281	290	281	2.01e-174	81.851	Peptostreptococcus anaerobius
LCVA_412	412	gi|1446050307|gb|RDY21675.1|	281	281	280	7.73e-83	46.429	Criibacterium bergeronii
LCVA_413	413	gi|690762299|gb|KGF10622.1|	272	273	271	1.04e-149	79.336	Peptostreptococcus sp. MV1
LCVA_413	413	gi|998234847|gb|KXI13628.1|	272	273	270	8.29e-159	78.148	Peptostreptococcus anaerobius
LCVA_413	413	gi|987357330|gb|KXB69851.1|	272	273	270	3.16e-158	77.778	Peptostreptococcus anaerobius
LCVA_414	414	gi|690762298|gb|KGF10621.1|	775	762	772	0	63.99	Peptostreptococcus sp. MV1
LCVA_414	414	gi|998234848|gb|KXI13629.1|	775	759	776	0	60.438	Peptostreptococcus anaerobius
LCVA_414	414	gi|987357331|gb|KXB69852.1|	775	759	776	0	60.309	Peptostreptococcus anaerobius
LCVA_415	415	gi|690762297|gb|KGF10620.1|	558	553	556	0	69.065	Peptostreptococcus sp. MV1
LCVA_415	415	gi|998234849|gb|KXI13630.1|	558	552	556	0	67.986	Peptostreptococcus anaerobius
LCVA_415	415	gi|987357332|gb|KXB69853.1|	558	552	556	0	67.626	Peptostreptococcus anaerobius
LCVA_416	416	gi|987357333|gb|KXB69854.1|	214	213	201	3.49e-94	66.667	Peptostreptococcus anaerobius
LCVA_416	416	gi|690762296|gb|KGF10619.1|	214	213	201	4.28e-89	64.179	Peptostreptococcus sp. MV1
LCVA_416	416	gi|985324266|gb|KXA08254.1|	214	221	193	5.62e-65	49.741	Enterococcus faecium
LCVA_417	417	gi|690762295|gb|KGF10618.1|	373	376	372	0	73.656	Peptostreptococcus sp. MV1
LCVA_417	417	gi|987357334|gb|KXB69855.1|	373	374	372	0	70.968	Peptostreptococcus anaerobius
LCVA_417	417	gi|985311920|gb|KWZ96365.1|	373	370	368	4.64e-167	61.685	Anaerococcus hydrogenalis
LCVA_419	419	gi|649932169|gb|KDS82262.1|	441	448	438	0	58.676	Lactobacillus rhamnosus 51B
LCVA_419	419	gi|674287422|gb|KFK47019.1|	441	448	438	0	58.676	Lactobacillus rhamnosus
LCVA_419	419	gi|731959922|gb|KHJ58864.1|	441	448	438	0	58.676	Lactobacillus rhamnosus
LCVA_421	421	gi|985303368|gb|KWZ88066.1|	546	34	25	8.7	33.333	Citrobacter freundii
LCVA_425	425	gi|985294214|gb|KWZ79321.1|	81	93	56	3.45e-11	44.643	Anaerococcus tetradius
LCVA_425	425	gi|985408065|gb|KXA69781.1|	81	93	59	8.4e-11	42.373	Megasphaera sp. MJR8396C
LCVA_425	425	gi|649931425|gb|KDS81522.1|	81	67	56	1.76e-09	37.5	Lactobacillus rhamnosus 51B
LCVA_426	426	WP_006905602.1	99	96	77	1.15e-13	33.766	Shuttleworthia_satelles
LCVA_426	426	EEP29214.1	99	96	77	1.15e-13	33.766	Shuttleworthia_satelles
LCVA_427	427	EGG83287.1	974	974	974	0	47.741	Lachnospiraceae_bacterium_2_1_46FAA
LCVA_427	427	WP_045000572.1	974	970	981	0	46.075	Shuttleworthia_satelles
LCVA_427	427	EEP29205.1	974	1074	981	0	46.075	Shuttleworthia_satelles
LCVA_428	428	WP_074716445.1	338	303	298	4.65e-124	57.383	Lachnobacterium_bovis
LCVA_428	428	SDY15472.1	338	310	298	7.77e-124	57.383	Lachnobacterium_bovis_DSM_14045
LCVA_428	428	EGG83286.1	338	298	295	1.95e-121	56.949	Lachnospiraceae_bacterium_2_1_46FAA
LCVA_429	429	WP_006905591.1	244	248	244	2.24e-79	44.262	Shuttleworthia_satelles
LCVA_429	429	EEP29203.1	244	248	244	2.24e-79	44.262	Shuttleworthia_satelles
LCVA_429	429	WP_083354447.1	244	251	239	3.56e-63	40.167	Lachnobacterium_bovis
LCVA_430	430	EEP29202.1	465	465	452	0	83.85	Shuttleworthia_satelles
LCVA_430	430	WP_074716439.1	465	465	465	0	81.935	Lachnobacterium_bovis
LCVA_430	430	SDY15386.1	465	465	465	0	81.935	Lachnobacterium_bovis_DSM_14045
LCVA_431	431	WP_074716553.1	343	327	354	1.15e-66	38.418	Lachnobacterium_bovis
LCVA_431	431	EEP29136.1	343	318	343	7.31e-67	37.318	Shuttleworthia_satelles
LCVA_431	431	EGG84048.1	343	317	347	1.39e-70	37.176	Lachnospiraceae_bacterium_2_1_46FAA
LCVA_432	432	gi|987355474|gb|KXB68112.1|	240	243	240	5.43e-132	75.417	Peptoniphilus sp. DNF00840
LCVA_432	432	gi|985348224|gb|KXA30984.1|	240	243	240	3.95e-132	75.417	Peptoniphilus harei
LCVA_432	432	gi|985324121|gb|KXA08118.1|	240	246	240	9.49e-113	65.833	Enterococcus faecium
LCVA_433	433	gi|987355473|gb|KXB68111.1|	254	256	254	5.59e-139	74.803	Peptoniphilus sp. DNF00840
LCVA_433	433	gi|985348225|gb|KXA30985.1|	254	256	254	2.34e-137	74.016	Peptoniphilus harei
LCVA_433	433	gi|985325828|gb|KXA09734.1|	254	526	228	7.68e-82	52.193	Finegoldia magna
LCVA_434	434	gi|987355472|gb|KXB68110.1|	289	284	277	3.1e-148	72.202	Peptoniphilus sp. DNF00840
LCVA_434	434	gi|985348226|gb|KXA30986.1|	289	284	277	5.71e-147	71.841	Peptoniphilus harei
LCVA_434	434	gi|985310859|gb|KWZ95351.1|	289	520	245	1.29e-98	59.592	Anaerococcus hydrogenalis
LCVA_435	435	WP_083354438.1	888	896	880	0	74.886	Lachnobacterium_bovis
LCVA_435	435	SDY15328.1	888	896	880	0	74.886	Lachnobacterium_bovis_DSM_14045
LCVA_435	435	gi|1331369011|gb|PNH20804.1|	888	878	865	0	73.988	Lachnospiraceae bacterium
LCVA_436	436	gi|987358045|gb|KXB70524.1|	87	83	82	1.71e-28	51.22	Peptostreptococcus anaerobius
LCVA_436	436	gi|987345064|gb|KXB58138.1|	87	91	75	1.23e-19	46.667	Lachnoanaerobaculum saburreum
LCVA_436	436	gi|985408196|gb|KXA69890.1|	87	90	76	8.09e-19	43.421	Megasphaera sp. MJR8396C
LCVA_437	437	gi|690760581|gb|KGF09013.1|	608	600	597	4.85e-160	42.379	Clostridiales bacterium S5-A14a
LCVA_437	437	WP_083354554.1	608	599	601	6.23e-154	40.932	Lachnobacterium_bovis
LCVA_437	437	SDY67781.1	608	598	601	5.48e-154	40.932	Lachnobacterium_bovis_DSM_14045
LCVA_439	439	gi|985330076|gb|KXA13711.1|	328	321	331	1.38e-71	39.275	Clostridium perfringens
LCVA_439	439	gi|667704737|gb|KFA57629.1|	328	328	334	3.91e-67	38.024	Mageeibacillus indolicus
LCVA_439	439	gi|985337303|gb|KXA20515.1|	573	328	215	4.02e-67	36.086	Klebsiella pneumoniae
LCVA_440	440	EGG82360.1	533	333	233	1.11e-56	45.064	Lachnospiraceae_bacterium_2_1_46FAA
LCVA_441	441	gi|1249066737|gb|PCN58008.1|	394	325	323	5.34e-132	57.276	Clostridioides difficile
LCVA_441	441	WP_074718809.1	394	338	325	1.03e-114	51.385	Lachnobacterium_bovis
LCVA_441	441	SDY69140.1	394	338	325	1.03e-114	51.385	Lachnobacterium_bovis_DSM_14045
LCVA_442	442	gi|1249066736|gb|PCN58007.1|	343	323	323	7.72e-136	58.824	Clostridioides difficile
LCVA_442	442	gi|985330073|gb|KXA13708.1|	343	323	319	2.61e-140	58.307	Clostridium perfringens
LCVA_442	442	gi|985365580|gb|KXA47461.1|	343	328	324	1.01e-133	55.556	Staphylococcus simulans
LCVA_444	444	WP_074719191.1	474	452	457	3.62e-140	46.608	Lachnobacterium_bovis
LCVA_444	444	SDY79728.1	474	452	457	3.62e-140	46.608	Lachnobacterium_bovis_DSM_14045
LCVA_444	444	gi|690800089|gb|KGF45598.1|	474	484	479	1.36e-138	46.138	Prevotella disiens DNF00882
LCVA_445	445	WP_074717308.1	497	485	478	0	72.176	Lachnobacterium_bovis
LCVA_445	445	SDY34416.1	497	485	478	0	72.176	Lachnobacterium_bovis_DSM_14045
LCVA_445	445	EEP27586.1	497	502	476	0	67.227	Shuttleworthia_satelles
LCVA_446	446	WP_006905572.1	435	441	439	0	63.326	Shuttleworthia_satelles
LCVA_446	446	EEP29184.1	435	441	439	0	63.326	Shuttleworthia_satelles
LCVA_446	446	WP_074715723.1	435	434	435	3.9e-164	53.333	Lachnobacterium_bovis
LCVA_447	447	gi|985309177|gb|KWZ93743.1|	51	376	28	3.3	50	Bifidobacterium longum
LCVA_447	447	gi|987335402|gb|KXB48809.1|	51	348	44	2.9	34.091	Coriobacteriales bacterium DNF00809
LCVA_448	448	WP_045000148.1	883	892	891	0	66.105	Shuttleworthia_satelles
LCVA_448	448	EEP29181.1	883	921	891	0	66.105	Shuttleworthia_satelles
LCVA_448	448	WP_074715721.1	883	886	872	0	64.564	Lachnobacterium_bovis
LCVA_450	450	gi|392435323|gb|EIW13273.1|	345	325	340	3.91e-90	41.765	Lactobacillus pentosus KCA1
LCVA_450	450	gi|692526837|gb|KGH42185.1|	345	325	342	3.36e-86	41.228	Lactobacillus plantarum CMPG5300
LCVA_450	450	gi|690756476|gb|KGF05292.1|	345	330	345	5.03e-85	39.13	Anaerococcus lactolyticus S7-1-13
LCVA_451	451	EGG82311.1	521	410	259	3.27e-49	37.066	Lachnospiraceae_bacterium_2_1_46FAA
LCVA_454	454	EGG84248.1	58	58	57	2.21e-33	91.228	Lachnospiraceae_bacterium_2_1_46FAA
LCVA_454	454	WP_022749434.1	58	58	57	4.82e-33	89.474	Lachnobacterium_bovis
LCVA_454	454	SDX94901.1	58	58	57	4.82e-33	89.474	Lachnobacterium_bovis_DSM_14045
LCVA_455	455	WP_074716178.1	531	531	530	0	77.358	Lachnobacterium_bovis
LCVA_455	455	SDY07365.1	531	531	530	0	77.358	Lachnobacterium_bovis_DSM_14045
LCVA_455	455	EEP29175.1	531	533	528	0	76.515	Shuttleworthia_satelles
LCVA_456	456	gi|1331368870|gb|PNH20667.1|	432	430	428	0	79.439	Lachnospiraceae bacterium
LCVA_456	456	WP_045000373.1	432	432	430	0	79.07	Shuttleworthia_satelles
LCVA_456	456	EEP28566.1	432	437	430	0	79.07	Shuttleworthia_satelles
LCVA_457	457	WP_074716179.1	348	365	326	0	82.515	Lachnobacterium_bovis
LCVA_457	457	SDY07394.1	348	365	326	0	82.515	Lachnobacterium_bovis_DSM_14045
LCVA_457	457	EGG84785.1	348	340	337	0	78.932	Lachnospiraceae_bacterium_2_1_46FAA
LCVA_458	458	WP_045000144.1	217	200	182	2.5e-54	47.802	Shuttleworthia_satelles
LCVA_458	458	EEP29172.1	217	203	182	2.59e-54	47.802	Shuttleworthia_satelles
LCVA_458	458	WP_083354421.1	217	207	184	4.15e-35	37.5	Lachnobacterium_bovis
LCVA_459	459	EGG84787.1	515	517	506	0	67.194	Lachnospiraceae_bacterium_2_1_46FAA
LCVA_459	459	WP_074716181.1	515	514	512	0	66.992	Lachnobacterium_bovis
LCVA_459	459	SDY07457.1	515	514	512	0	66.992	Lachnobacterium_bovis_DSM_14045
LCVA_460	460	WP_156784503.1	270	288	269	1.07e-64	40.149	Shuttleworthia_satelles
LCVA_460	460	gi|1249064776|gb|PCN56084.1|	270	287	275	3.52e-61	40	Clostridioides difficile
LCVA_460	460	EEP29079.1	270	298	271	2.68e-64	39.852	Shuttleworthia_satelles
LCVA_462	462	WP_074718517.1	252	203	187	8.86e-89	64.706	Lachnobacterium_bovis
LCVA_462	462	gi|1604463278|gb|TFF68535.1|	252	274	191	2.07e-86	62.827	Helcococcus ovis
LCVA_462	462	gi|987353645|gb|KXB66354.1|	252	238	245	2.44e-89	53.469	Parvimonas sp. KA00067
LCVA_463	463	gi|690765524|gb|KGF13586.1|	255	264	257	3.95e-89	54.475	Peptostreptococcus sp. MV1
LCVA_463	463	WP_074715387.1	255	260	251	5.98e-93	52.59	Lachnobacterium_bovis
LCVA_463	463	SDX90962.1	255	260	251	5.98e-93	52.59	Lachnobacterium_bovis_DSM_14045
LCVA_465	465	WP_074716221.1	186	196	186	1.63e-90	63.978	Lachnobacterium_bovis
LCVA_465	465	SDY08428.1	186	196	186	1.63e-90	63.978	Lachnobacterium_bovis_DSM_14045
LCVA_465	465	gi|987360830|gb|KXB73158.1|	186	188	186	8.23e-79	57.527	Peptostreptococcus anaerobius
LCVA_466	466	EGG79360.1	330	294	270	6.48e-43	34.444	Lachnospiraceae_bacterium_2_1_46FAA
LCVA_466	466	WP_074714786.1	330	299	308	5.06e-39	29.87	Lachnobacterium_bovis
LCVA_466	466	SDX82896.1	330	299	308	5.06e-39	29.87	Lachnobacterium_bovis_DSM_14045
LCVA_467	467	WP_074715344.1	363	373	326	2.79e-136	59.509	Lachnobacterium_bovis
LCVA_467	467	SDX84851.1	363	373	326	2.79e-136	59.509	Lachnobacterium_bovis_DSM_14045
LCVA_467	467	EGG79361.1	363	634	331	2.83e-101	46.224	Lachnospiraceae_bacterium_2_1_46FAA
LCVA_468	468	WP_074714956.1	267	258	252	2.56e-137	75	Lachnobacterium_bovis
LCVA_468	468	SDX84877.1	267	258	252	2.56e-137	75	Lachnobacterium_bovis_DSM_14045
LCVA_468	468	gi|987339627|gb|KXB52937.1|	267	263	253	9.82e-97	55.731	Lachnoanaerobaculum saburreum
LCVA_469	469	WP_074714959.1	273	274	265	1.82e-114	62.642	Lachnobacterium_bovis
LCVA_469	469	SDX84906.1	273	274	265	1.82e-114	62.642	Lachnobacterium_bovis_DSM_14045
LCVA_469	469	EGG79362.1	273	272	264	4.67e-100	56.061	Lachnospiraceae_bacterium_2_1_46FAA
LCVA_470	470	WP_074714962.1	357	359	357	0	77.031	Lachnobacterium_bovis
LCVA_470	470	SDX84938.1	357	359	357	0	77.031	Lachnobacterium_bovis_DSM_14045
LCVA_470	470	EGG79363.1	357	357	357	0	73.95	Lachnospiraceae_bacterium_2_1_46FAA
LCVA_471	471	EGG84175.1	229	234	228	6.08e-75	51.754	Lachnospiraceae_bacterium_2_1_46FAA
LCVA_471	471	gi|1249066355|gb|PCN57629.1|	229	240	226	7.21e-66	50	Clostridioides difficile
LCVA_471	471	gi|985325285|gb|KXA09233.1|	229	255	230	2.77e-65	45.652	Enterococcus faecium
LCVA_472	472	EGG83181.1	509	508	510	0	54.51	Lachnospiraceae_bacterium_2_1_46FAA
LCVA_472	472	WP_006905837.1	509	511	504	1.19e-146	46.032	Shuttleworthia_satelles
LCVA_472	472	EEP29449.1	509	511	504	1.19e-146	46.032	Shuttleworthia_satelles
LCVA_474	474	gi|985325708|gb|KXA09622.1|	1001	2627	706	2.22e-153	39.802	Clostridium perfringens
LCVA_475	475	gi|985291827|gb|KWZ77106.1|	150	128	128	4.07e-37	46.094	Anaerococcus tetradius
LCVA_475	475	gi|690758283|gb|KGF06885.1|	150	145	137	4.06e-43	45.985	Tissierellia bacterium S7-1-4
LCVA_475	475	gi|1001049960|gb|KXO15195.1|	150	145	137	2.38e-39	43.066	Clostridiales bacterium KA00134
LCVA_476	476	gi|985300142|gb|KWZ84965.1|	277	275	273	1.1e-107	59.707	Bacillus coagulans
LCVA_476	476	gi|985327206|gb|KXA11038.1|	277	276	271	1.26e-109	58.303	Clostridium perfringens
LCVA_476	476	gi|909820866|gb|AKU04152.1|	277	276	276	8.28e-101	48.913	Streptococcus agalactiae
LCVA_477	477	gi|985327207|gb|KXA11039.1|	570	568	566	0	55.83	Clostridium perfringens
LCVA_477	477	gi|985300143|gb|KWZ84966.1|	570	590	563	0	54.707	Bacillus coagulans
LCVA_477	477	gi|998234139|gb|KXI12970.1|	570	558	547	0	54.296	Streptococcus pasteurianus
LCVA_478	478	gi|985300144|gb|KWZ84967.1|	183	184	178	7.31e-74	61.798	Bacillus coagulans
LCVA_478	478	gi|649932797|gb|KDS82888.1|	183	186	182	6.18e-65	53.297	Lactobacillus rhamnosus 51B
LCVA_478	478	gi|668900290|gb|KFC34021.1|	183	186	182	5.54e-65	53.297	Lactobacillus rhamnosus K32
LCVA_479	479	gi|985300145|gb|KWZ84968.1|	283	284	279	1.2e-121	60.573	Bacillus coagulans
LCVA_479	479	gi|985381291|gb|KXA62613.1|	283	291	278	4.55e-106	54.676	Streptococcus mitis
LCVA_479	479	gi|690752684|gb|KGF01710.1|	283	285	274	8.99e-107	54.38	Actinomyces sp. S4-C9
LCVA_480	480	gi|690801765|gb|KGF47030.1|	58	527	40	1.58e-13	77.5	Veillonella montpellierensis DNF00314
LCVA_480	480	gi|984719700|gb|AMB93262.1|	58	523	40	4.39e-13	75	Aerococcus christensenii
LCVA_480	480	gi|987318623|gb|KXB32785.1|	58	527	40	4.52e-13	75	Aerococcus christensenii
LCVA_482	482	gi|514578246|gb|EPI41115.1|	55	348	51	1.34e-28	98.039	Gardnerella vaginalis JCP8481B
LCVA_482	482	gi|987359045|gb|KXB71460.1|	55	341	51	5.27e-27	94.118	Peptostreptococcus anaerobius
LCVA_482	482	gi|514587106|gb|EPI48997.1|	55	65	51	2.35e-18	70.588	Gardnerella vaginalis JCP7719
LCVA_483	483	gi|985294229|gb|KWZ79336.1|	58	121	43	6.58e-07	41.86	Anaerococcus tetradius
LCVA_483	483	gi|690801385|gb|KGF46695.1|	58	290	35	0.11	40	Prevotella disiens DNF00882
LCVA_483	483	gi|987327925|gb|KXB41649.1|	58	139	56	0.19	30.357	Clostridiales bacterium KA00274
LCVA_484	484	gi|987334342|gb|KXB47812.1|	56	66	30	4.69e-06	76.667	Tissierellia bacterium KA00581
LCVA_484	484	gi|1604458714|gb|TFF64225.1|	56	136	30	4.89e-06	73.333	Helcococcus ovis
LCVA_484	484	gi|985325181|gb|KXA09133.1|	56	230	25	0.056	64	Finegoldia magna
LCVA_485	485	gi|985291463|gb|KWZ76777.1|	41	110	41	1.11e-18	82.927	Anaerococcus tetradius
LCVA_485	485	gi|985315896|gb|KXA00258.1|	41	74	41	9.26e-19	82.927	Anaerococcus hydrogenalis
LCVA_485	485	gi|987342978|gb|KXB56171.1|	41	550	22	1.3	54.545	Lachnoanaerobaculum saburreum
LCVA_486	486	gi|985291462|gb|KWZ76776.1|	111	76	75	1.43e-40	81.333	Anaerococcus tetradius
LCVA_486	486	gi|985346642|gb|KXA29444.1|	111	108	107	1.19e-60	80.374	Peptoniphilus harei
LCVA_486	486	gi|985315895|gb|KXA00257.1|	111	76	75	3.72e-40	80	Anaerococcus hydrogenalis
LCVA_487	487	WP_006906070.1	80	54	34	1.85e-05	47.059	Shuttleworthia_satelles
LCVA_487	487	EEP28252.1	80	54	34	1.85e-05	47.059	Shuttleworthia_satelles
LCVA_487	487	gi|1446049130|gb|RDY20524.1|	80	61	54	1.01e-05	42.593	Criibacterium bergeronii
LCVA_488	488	gi|690783393|gb|KGF30312.1|	212	212	212	4.4e-145	92.925	Peptoniphilus lacrimalis DNF00528
LCVA_488	488	gi|985291262|gb|KWZ76594.1|	212	252	212	2.8e-144	92.925	Anaerococcus tetradius
LCVA_488	488	gi|1001049699|gb|KXO14955.1|	212	212	212	8.06e-144	92.453	Clostridiales bacterium KA00134
LCVA_489	489	gi|1001049698|gb|KXO14954.1|	583	583	583	0	92.11	Clostridiales bacterium KA00134
LCVA_489	489	gi|985291261|gb|KWZ76593.1|	583	583	583	0	92.11	Anaerococcus tetradius
LCVA_489	489	gi|985327216|gb|KXA11047.1|	583	583	583	0	92.11	Finegoldia magna
LCVA_490	490	gi|690783391|gb|KGF30310.1|	574	574	574	0	99.129	Peptoniphilus lacrimalis DNF00528
LCVA_490	490	gi|985347387|gb|KXA30167.1|	574	574	574	0	98.78	Peptoniphilus harei
LCVA_490	490	gi|985291260|gb|KWZ76592.1|	574	574	574	0	98.432	Anaerococcus tetradius
LCVA_491	491	gi|985291259|gb|KWZ76591.1|	502	509	502	0	97.012	Anaerococcus tetradius
LCVA_491	491	gi|985347388|gb|KXA30168.1|	502	502	502	0	96.614	Peptoniphilus harei
LCVA_491	491	gi|985327214|gb|KXA11045.1|	502	502	502	0	96.414	Finegoldia magna
LCVA_492	492	gi|985347389|gb|KXA30169.1|	233	233	233	5.31e-169	100	Peptoniphilus harei
LCVA_492	492	gi|1001049695|gb|KXO14951.1|	233	233	233	1.63e-168	99.571	Clostridiales bacterium KA00134
LCVA_492	492	gi|985291258|gb|KWZ76590.1|	233	233	233	2.2e-165	97.425	Anaerococcus tetradius
LCVA_493	493	gi|985347390|gb|KXA30170.1|	193	195	193	1.15e-134	98.964	Peptoniphilus harei
LCVA_493	493	gi|1001049694|gb|KXO14950.1|	193	194	191	4.29e-132	97.906	Clostridiales bacterium KA00134
LCVA_493	493	gi|985291257|gb|KWZ76589.1|	193	195	193	2.71e-131	96.373	Anaerococcus tetradius
LCVA_494	494	gi|327491344|gb|EGF23118.1|	315	315	315	0	93.333	Atopobium vaginae DSM 15829
LCVA_494	494	gi|996353559|gb|KXG91066.1|	315	316	315	0	91.111	Atopobium vaginae
LCVA_494	494	gi|987339028|gb|KXB52355.1|	315	314	313	2.65e-172	72.524	Coriobacteriales bacterium DNF00809
LCVA_495	495	gi|1331368412|gb|PNH20216.1|	110	125	107	1.74e-64	89.72	Lachnospiraceae bacterium
LCVA_495	495	gi|667703993|gb|KFA56968.1|	110	125	107	1.54e-64	89.72	Mageeibacillus indolicus
LCVA_495	495	gi|987335679|gb|KXB49079.1|	110	125	107	3.11e-64	88.785	Coriobacteriales bacterium DNF00809
LCVA_496	496	gi|296888304|gb|EFH27045.1|	80	80	80	5.43e-52	97.5	Gardnerella vaginalis AMD
LCVA_496	496	gi|1331368411|gb|PNH20215.1|	80	80	80	2.42e-51	96.25	Lachnospiraceae bacterium
LCVA_496	496	gi|514589730|gb|EPI51246.1|	80	80	80	2.4e-50	95	Gardnerella vaginalis JCP7672
LCVA_497	497	gi|1333049954|gb|PNP89034.1|	119	241	119	1.67e-79	99.16	Gardnerella sp. DNF01162
LCVA_497	497	gi|296888303|gb|EFH27044.1|	119	241	119	1.9e-79	99.16	Gardnerella vaginalis AMD
LCVA_497	497	gi|985331725|gb|KXA15266.1|	119	241	119	1.97e-79	99.16	Gardnerella vaginalis
LCVA_498	498	gi|1331370526|gb|PNH22288.1|	167	306	174	5.45e-27	40.23	Megasphaera genomosp. type_2
LCVA_498	498	gi|1331366642|gb|PNH18455.1|	167	296	171	1.91e-26	37.427	Mageeibacillus indolicus
LCVA_498	498	gi|667705056|gb|KFA57909.1|	167	296	171	5.42e-26	36.842	Mageeibacillus indolicus
LCVA_499	499	gi|690757753|gb|KGF06481.1|	171	171	171	1.35e-109	89.474	Arcanobacterium sp. S3PF19
LCVA_499	499	gi|1249066231|gb|PCN57506.1|	171	169	170	4.78e-77	67.059	Clostridioides difficile
LCVA_499	499	gi|690760173|gb|KGF08621.1|	171	171	169	2.34e-65	61.538	Clostridiales bacterium S5-A14a
LCVA_500	500	gi|987328579|gb|KXB42280.1|	425	427	425	0	93.412	Clostridiales bacterium KA00274
LCVA_500	500	gi|1418402355|gb|AWZ29456.1|	425	423	423	0	82.27	Streptococcus agalactiae
LCVA_500	500	gi|909819854|gb|AKU03140.1|	425	425	425	0	82.118	Streptococcus agalactiae
LCVA_501	501	gi|987357460|gb|KXB69972.1|	218	218	218	9.65e-148	94.495	Peptostreptococcus anaerobius
LCVA_501	501	gi|690767352|gb|KGF15265.1|	218	218	218	3.19e-146	93.578	Peptostreptococcus sp. MV1
LCVA_501	501	gi|985290412|gb|KWZ75822.1|	218	218	218	2.27e-145	93.578	Alloscardovia omnicolens
LCVA_502	502	gi|987328577|gb|KXB42278.1|	458	458	458	0	96.943	Clostridiales bacterium KA00274
LCVA_502	502	gi|690767351|gb|KGF15264.1|	458	458	458	0	94.541	Peptostreptococcus sp. MV1
LCVA_502	502	gi|985290413|gb|KWZ75823.1|	458	458	458	0	93.45	Alloscardovia omnicolens
LCVA_503	503	gi|987328576|gb|KXB42277.1|	217	225	217	5.33e-152	97.235	Clostridiales bacterium KA00274
LCVA_503	503	gi|909819857|gb|AKU03143.1|	217	217	217	1.2e-146	92.627	Streptococcus agalactiae
LCVA_503	503	gi|1418402358|gb|AWZ29459.1|	217	217	217	3.98e-146	92.166	Streptococcus agalactiae
LCVA_504	504	gi|987328575|gb|KXB42276.1|	436	439	437	0	92.22	Clostridiales bacterium KA00274
LCVA_504	504	gi|690767349|gb|KGF15262.1|	436	439	437	0	89.245	Peptostreptococcus sp. MV1
LCVA_504	504	gi|987357463|gb|KXB69975.1|	436	439	437	0	89.245	Peptostreptococcus anaerobius
LCVA_505	505	gi|985295662|gb|KWZ80680.1|	49	1292	24	2.9	54.167	Bifidobacterium bifidum
LCVA_505	505	gi|987345709|gb|KXB58738.1|	49	454	24	0.12	45.833	Gemella asaccharolytica
LCVA_506	506	gi|1249064891|gb|PCN56195.1|	357	360	359	0	91.922	Clostridioides difficile
LCVA_506	506	gi|985348764|gb|KXA31491.1|	357	360	360	0	91.389	Peptoniphilus harei
LCVA_506	506	gi|987334058|gb|KXB47551.1|	357	360	360	0	89.167	Tissierellia bacterium KA00581
LCVA_507	507	gi|1249064892|gb|PCN56196.1|	62	160	57	2.76e-32	92.982	Clostridioides difficile
LCVA_507	507	gi|690758968|gb|KGF07488.1|	62	160	57	1.82e-31	91.228	Tissierellia bacterium S5-A11
LCVA_507	507	gi|985348765|gb|KXA31492.1|	62	160	57	9.43e-30	85.965	Peptoniphilus harei
LCVA_508	508	gi|1334004344|gb|PNS43620.1|	390	390	390	0	97.179	Gardnerella vaginalis
LCVA_508	508	gi|987323958|gb|KXB37855.1|	390	381	381	0	95.538	Aerococcus christensenii
LCVA_508	508	gi|987328511|gb|KXB42215.1|	390	390	390	0	82.308	Clostridiales bacterium KA00274
LCVA_509	509	gi|987318622|gb|KXB32784.1|	70	75	69	2.11e-39	88.406	Aerococcus christensenii
LCVA_509	509	gi|984719606|gb|AMB93168.1|	70	75	69	1.76e-38	86.957	Aerococcus christensenii
LCVA_509	509	gi|987381989|gb|KXB93293.1|	70	79	68	2.11e-20	51.471	Veillonellaceae bacterium DNF00626
LCVA_510	510	gi|987318623|gb|KXB32785.1|	239	527	233	3.71e-152	89.27	Aerococcus christensenii
LCVA_510	510	gi|984719700|gb|AMB93262.1|	239	523	233	4.62e-152	89.27	Aerococcus christensenii
LCVA_510	510	gi|667703877|gb|KFA56857.1|	239	522	233	1.6e-151	88.841	Mageeibacillus indolicus
LCVA_511	511	gi|987328557|gb|KXB42261.1|	69	69	69	1.45e-45	98.551	Clostridiales bacterium KA00274
LCVA_511	511	gi|514601142|gb|EPI61381.1|	69	69	69	1.52e-44	97.101	Gardnerella vaginalis JCP8066
LCVA_511	511	gi|987326541|gb|KXB40321.1|	69	55	31	4.12e-14	93.548	Clostridiales bacterium KA00274
LCVA_512	512	gi|514601141|gb|EPI61380.1|	550	455	451	0	94.9	Gardnerella vaginalis JCP8066
LCVA_512	512	gi|987328558|gb|KXB42262.1|	550	474	385	1.58e-175	66.234	Clostridiales bacterium KA00274
LCVA_512	512	gi|690771832|gb|KGF19401.1|	550	525	379	1.77e-121	48.813	Pseudoglutamicibacter albus DNF00011
LCVA_513	513	gi|985332019|gb|KXA15551.1|	68	59	59	1.01e-33	89.831	Gardnerella vaginalis
LCVA_513	513	gi|985405521|gb|KXA67519.1|	68	68	68	5.6e-32	75	Cutibacterium avidum
LCVA_514	514	gi|987343851|gb|KXB57021.1|	213	104	104	1.92e-62	89.423	Gemella asaccharolytica
LCVA_514	514	gi|985405522|gb|KXA67520.1|	213	889	193	2.63e-98	74.093	Cutibacterium avidum
LCVA_515	515	gi|1521747159|gb|RPV66639.1|	287	75	48.1	1.88e-08	39.706	Pseudomonas aeruginosa
LCVA_515	515	gi|692527486|gb|KGH42788.1|	75	68	67	1.18e-09	35.821	Lactobacillus plantarum CMPG5300
LCVA_515	515	gi|985335294|gb|KXA18644.1|	851	75	53.5	2.17e-10	31.081	Fusobacterium nucleatum
LCVA_516	516	WP_074717792.1	404	414	425	4.14e-86	42.118	Lachnobacterium_bovis
LCVA_516	516	SDY44356.1	404	414	425	4.14e-86	42.118	Lachnobacterium_bovis_DSM_14045
LCVA_516	516	gi|690801255|gb|KGF46581.1|	404	415	413	8.61e-82	37.046	Prevotella disiens DNF00882
LCVA_519	519	gi|1249066360|gb|PCN57634.1|	475	359	316	7.16e-137	64.241	Clostridioides difficile
LCVA_519	519	WP_074717787.1	475	482	377	9.78e-130	52.52	Lachnobacterium_bovis
LCVA_519	519	SDY44290.1	475	482	377	9.78e-130	52.52	Lachnobacterium_bovis_DSM_14045
LCVA_520	520	gi|1249066361|gb|PCN57635.1|	424	415	417	8.75e-174	55.396	Clostridioides difficile
LCVA_520	520	gi|297532323|gb|EFH71211.1|	424	458	415	2.65e-135	46.506	Gardnerella vaginalis 5-1
LCVA_520	520	gi|987359505|gb|KXB71906.1|	424	426	431	2.27e-138	46.404	Peptostreptococcus anaerobius
LCVA_521	521	gi|1249066417|gb|PCN57691.1|	395	398	373	9.06e-70	36.193	Clostridioides difficile
LCVA_521	521	WP_074717781.1	395	396	375	3.59e-52	32.267	Lachnobacterium_bovis
LCVA_521	521	SDY44217.1	395	396	375	3.59e-52	32.267	Lachnobacterium_bovis_DSM_14045
LCVA_522	522	gi|514601134|gb|EPI61373.1|	45	73	45	1.97e-23	97.778	Gardnerella vaginalis JCP8066
LCVA_522	522	gi|987323971|gb|KXB37868.1|	45	47	45	4.59e-21	93.333	Aerococcus christensenii
LCVA_522	522	gi|987319079|gb|KXB33225.1|	45	73	45	4.3e-22	91.111	Atopobium deltae
LCVA_523	523	gi|514601133|gb|EPI61372.1|	210	214	212	3.49e-117	79.245	Gardnerella vaginalis JCP8066
LCVA_523	523	gi|514590692|gb|EPI52133.1|	210	234	207	8.27e-108	75.362	Gardnerella vaginalis JCP7719
LCVA_523	523	gi|514593144|gb|EPI54292.1|	210	214	212	5.76e-108	73.585	Gardnerella vaginalis JCP7276
LCVA_524	524	gi|514601132|gb|EPI61371.1|	59	59	59	9.38e-32	84.746	Gardnerella vaginalis JCP8066
LCVA_524	524	gi|514583612|gb|EPI45821.1|	59	73	59	1.1e-30	83.051	Gardnerella vaginalis JCP8108
LCVA_524	524	gi|1334003696|gb|PNS43017.1|	59	73	59	8.42e-31	83.051	Gardnerella vaginalis
LCVA_525	525	gi|987359501|gb|KXB71902.1|	95	97	97	1.15e-28	57.732	Peptostreptococcus anaerobius
LCVA_525	525	gi|296888932|gb|EFH27666.1|	95	102	97	8.67e-26	55.67	Gardnerella vaginalis AMD
LCVA_525	525	gi|514589066|gb|EPI50661.1|	95	102	97	7.12e-26	52.577	Gardnerella vaginalis JCP8017A
LCVA_526	526	gi|1334003698|gb|PNS43019.1|	375	376	371	0	67.385	Gardnerella vaginalis
LCVA_526	526	gi|1333050078|gb|PNP89156.1|	375	376	371	0	67.116	Gardnerella sp. DNF01162
LCVA_526	526	gi|297532129|gb|EFH71102.1|	375	388	371	0	67.116	Gardnerella vaginalis 5-1
LCVA_527	527	gi|514601129|gb|EPI61368.1|	182	182	181	1.98e-112	84.53	Gardnerella vaginalis JCP8066
LCVA_527	527	gi|1333050976|gb|PNP90050.1|	182	182	181	5.56e-112	83.978	Gardnerella sp. KA00735
LCVA_527	527	gi|998237416|gb|KXI16078.1|	182	197	181	2.46e-112	83.978	Gardnerella vaginalis
LCVA_528	528	gi|1333050975|gb|PNP90049.1|	655	658	658	0	74.164	Gardnerella sp. KA00735
LCVA_528	528	gi|1333047641|gb|PNP86803.1|	655	658	658	0	74.164	Gardnerella vaginalis
LCVA_528	528	gi|998237415|gb|KXI16077.1|	655	674	658	0	73.86	Gardnerella vaginalis
LCVA_529	529	gi|514583619|gb|EPI45828.1|	263	263	263	1.33e-145	73.764	Gardnerella vaginalis JCP8108
LCVA_529	529	gi|514593137|gb|EPI54285.1|	263	263	263	5.19e-146	73.764	Gardnerella vaginalis JCP7276
LCVA_529	529	gi|297532133|gb|EFH71106.1|	263	263	263	6.32e-146	73.764	Gardnerella vaginalis 5-1
LCVA_530	530	gi|987359494|gb|KXB71895.1|	120	125	120	3.11e-54	68.333	Peptostreptococcus anaerobius
LCVA_530	530	gi|998239821|gb|KXI18372.1|	120	124	120	4.88e-54	62.5	Gardnerella vaginalis
LCVA_530	530	gi|987380193|gb|KXB91581.1|	120	124	120	1.13e-55	59.167	Veillonellaceae bacterium KA00182
LCVA_531	531	gi|514590683|gb|EPI52124.1|	737	739	737	0	80.054	Gardnerella vaginalis JCP7719
LCVA_531	531	gi|514595227|gb|EPI56085.1|	737	737	737	0	80.054	Lactobacillus_coleohominis_DSM_14060
LCVA_531	531	gi|514593135|gb|EPI54283.1|	737	739	737	0	80.054	Gardnerella vaginalis JCP7276
LCVA_533	533	gi|514583623|gb|EPI45832.1|	96	96	96	1.66e-41	67.708	Gardnerella vaginalis JCP8108
LCVA_533	533	gi|514591675|gb|EPI53022.1|	96	96	96	8.12e-41	66.667	Gardnerella vaginalis JCP8017A
LCVA_533	533	gi|514590681|gb|EPI52122.1|	96	96	96	1.26e-40	66.667	Gardnerella vaginalis JCP7719
LCVA_534	534	gi|987359490|gb|KXB71891.1|	446	447	446	0	82.063	Peptostreptococcus anaerobius
LCVA_534	534	gi|1333050072|gb|PNP89150.1|	446	479	446	0	81.166	Gardnerella sp. DNF01162
LCVA_534	534	gi|514591674|gb|EPI53021.1|	446	479	446	0	81.166	Gardnerella vaginalis JCP8017A
LCVA_535	535	gi|987352168|gb|KXB64924.1|	133	142	130	1.45e-61	68.462	Peptoniphilus coxii
LCVA_535	535	gi|987359489|gb|KXB71890.1|	133	142	130	1.06e-60	66.923	Peptostreptococcus anaerobius
LCVA_535	535	gi|985311834|gb|KWZ96281.1|	133	133	133	1.41e-57	63.91	Anaerococcus hydrogenalis
LCVA_536	536	gi|327490943|gb|EGF22721.1|	122	154	119	7.05e-69	78.151	Atopobium vaginae DSM 15829
LCVA_536	536	gi|1334003709|gb|PNS43030.1|	122	119	119	1.14e-68	78.151	Gardnerella vaginalis
LCVA_536	536	gi|1333051410|gb|PNP90482.1|	122	119	119	2.08e-68	77.311	Gardnerella sp. DNF01162
LCVA_537	537	gi|1333051010|gb|PNP90084.1|	183	183	183	1.56e-134	98.907	Gardnerella sp. KA00735
LCVA_537	537	gi|1333047609|gb|PNP86771.1|	183	183	183	2.56e-133	97.814	Gardnerella vaginalis
LCVA_537	537	gi|514590675|gb|EPI52116.1|	183	183	183	1.29e-132	96.175	Gardnerella vaginalis JCP7719
LCVA_538	538	gi|1333051009|gb|PNP90083.1|	261	261	261	0	96.552	Gardnerella sp. KA00735
LCVA_538	538	gi|998240682|gb|KXI19197.1|	261	261	261	0	95.402	Gardnerella vaginalis
LCVA_538	538	gi|514590674|gb|EPI52115.1|	261	261	261	0	95.019	Gardnerella vaginalis JCP7719
LCVA_539	539	gi|998240681|gb|KXI19196.1|	422	422	422	0	96.682	Gardnerella vaginalis
LCVA_539	539	gi|1333047611|gb|PNP86773.1|	422	422	422	0	96.445	Gardnerella vaginalis
LCVA_539	539	gi|1333051008|gb|PNP90082.1|	422	422	422	0	95.735	Gardnerella sp. KA00735
LCVA_540	540	gi|987359484|gb|KXB71885.1|	526	530	525	0	89.905	Peptostreptococcus anaerobius
LCVA_540	540	gi|1333047612|gb|PNP86774.1|	526	495	524	0	74.427	Gardnerella vaginalis
LCVA_540	540	gi|998240680|gb|KXI19195.1|	526	495	524	0	74.237	Gardnerella vaginalis
LCVA_541	541	gi|987359483|gb|KXB71884.1|	218	218	218	4.17e-153	95.872	Peptostreptococcus anaerobius
LCVA_541	541	gi|1333047613|gb|PNP86775.1|	218	211	209	1.97e-72	53.11	Gardnerella vaginalis
LCVA_541	541	gi|1333051006|gb|PNP90080.1|	218	211	209	8.14e-73	52.632	Gardnerella sp. KA00735
LCVA_542	542	gi|987359482|gb|KXB71883.1|	75	78	75	6.63e-44	89.333	Peptostreptococcus anaerobius
LCVA_542	542	gi|1333047614|gb|PNP86776.1|	75	75	72	1.8e-29	68.056	Gardnerella vaginalis
LCVA_542	542	gi|1333051005|gb|PNP90079.1|	75	75	74	3.59e-28	66.216	Gardnerella sp. KA00735
LCVA_543	543	gi|987359481|gb|KXB71882.1|	57	57	56	1.76e-29	85.714	Peptostreptococcus anaerobius
LCVA_543	543	gi|1249066382|gb|PCN57656.1|	57	61	57	6.32e-14	52.632	Clostridioides difficile
LCVA_543	543	gi|1539874597|emb|VEF36234.1|	57	68	54	5.21e-13	46.296	Lactobacillus acidophilus
LCVA_544	544	gi|1333051004|gb|PNP90078.1|	100	94	93	1.21e-37	65.591	Gardnerella sp. KA00735
LCVA_544	544	gi|1333047615|gb|PNP86777.1|	100	94	93	5.9e-35	62.366	Gardnerella vaginalis
LCVA_544	544	gi|296888914|gb|EFH27648.1|	100	94	93	5.7e-34	59.14	Gardnerella vaginalis AMD
LCVA_545	545	gi|514590094|gb|EPI51581.1|	530	530	530	0	97.736	Gardnerella vaginalis JCP8017A
LCVA_545	545	gi|514590668|gb|EPI52109.1|	530	530	530	0	97.547	Gardnerella vaginalis JCP7719
LCVA_545	545	gi|1333047617|gb|PNP86779.1|	530	530	530	0	97.547	Gardnerella vaginalis
LCVA_546	546	gi|514593119|gb|EPI54267.1|	410	415	405	0	85.926	Gardnerella vaginalis JCP7276
LCVA_546	546	gi|514590093|gb|EPI51580.1|	410	445	413	0	85.472	Gardnerella vaginalis JCP8017A
LCVA_546	546	gi|514590667|gb|EPI52108.1|	410	429	413	0	85.23	Gardnerella vaginalis JCP7719
LCVA_547	547	gi|1333049980|gb|PNP89060.1|	247	244	248	3.52e-119	70.968	Gardnerella sp. DNF01162
LCVA_547	547	gi|1333047619|gb|PNP86781.1|	247	244	248	6.85e-118	70.968	Gardnerella vaginalis
LCVA_547	547	gi|296888908|gb|EFH27642.1|	247	244	248	3.87e-118	70.565	Gardnerella vaginalis AMD
LCVA_548	548	gi|998237438|gb|KXI16100.1|	395	394	393	0	81.679	Gardnerella vaginalis
LCVA_548	548	gi|1333050997|gb|PNP90071.1|	395	394	393	0	81.425	Gardnerella sp. KA00735
LCVA_548	548	gi|514593115|gb|EPI54263.1|	395	394	393	0	81.425	Gardnerella vaginalis JCP7276
LCVA_549	549	gi|1333050996|gb|PNP90070.1|	91	92	98	4.18e-26	50	Gardnerella sp. KA00735
LCVA_549	549	gi|514583642|gb|EPI45851.1|	91	92	98	5.38e-26	50	Gardnerella vaginalis JCP8108
LCVA_549	549	gi|987343865|gb|KXB57035.1|	91	90	90	2.42e-26	50	Gemella asaccharolytica
LCVA_550	550	gi|987360415|gb|KXB72768.1|	110	110	110	7.13e-27	45.455	Peptostreptococcus anaerobius
LCVA_550	550	gi|514590089|gb|EPI51576.1|	110	110	110	1.34e-26	40	Gardnerella vaginalis JCP8017A
LCVA_550	550	gi|1334004654|gb|PNS43906.1|	110	110	110	4.56e-27	40	Gardnerella vaginalis
LCVA_551	551	gi|690786480|gb|KGF33242.1|	125	129	123	1.62e-43	56.911	Peptoniphilus lacrimalis DNF00528
LCVA_551	551	gi|690758372|gb|KGF06961.1|	125	126	123	8.11e-44	56.911	Tissierellia bacterium S5-A11
LCVA_551	551	gi|985313900|gb|KWZ98296.1|	125	126	123	4.85e-44	56.911	Anaerococcus hydrogenalis
LCVA_552	552	gi|1333050993|gb|PNP90067.1|	115	112	103	7.62e-35	52.427	Gardnerella sp. KA00735
LCVA_552	552	gi|514590087|gb|EPI51574.1|	115	112	103	2.54e-34	52.427	Gardnerella vaginalis JCP8017A
LCVA_552	552	gi|998237434|gb|KXI16096.1|	115	112	103	7.09e-34	51.456	Gardnerella vaginalis
LCVA_553	553	gi|985313902|gb|KWZ98298.1|	202	198	181	8.37e-91	69.613	Anaerococcus hydrogenalis
LCVA_553	553	gi|987352187|gb|KXB64943.1|	202	211	193	3.26e-90	65.285	Peptoniphilus coxii
LCVA_553	553	gi|987343860|gb|KXB57030.1|	202	198	192	8.16e-90	65.104	Gemella asaccharolytica
LCVA_554	554	gi|987343859|gb|KXB57029.1|	124	118	118	1.47e-49	62.712	Gemella asaccharolytica
LCVA_554	554	gi|987352188|gb|KXB64944.1|	124	118	118	1.08e-49	61.864	Peptoniphilus coxii
LCVA_554	554	gi|690758369|gb|KGF06958.1|	124	118	118	2.33e-49	61.017	Tissierellia bacterium S5-A11
LCVA_555	555	gi|987343858|gb|KXB57028.1|	54	54	54	2.13e-25	72.222	Gemella asaccharolytica
LCVA_555	555	gi|985313904|gb|KWZ98300.1|	54	54	54	1.42e-25	72.222	Anaerococcus hydrogenalis
LCVA_555	555	gi|987352189|gb|KXB64945.1|	54	54	54	5.19e-25	70.37	Peptoniphilus coxii
LCVA_556	556	gi|987360409|gb|KXB72762.1|	853	1023	983	0	37.03	Peptostreptococcus anaerobius
LCVA_556	556	gi|985313907|gb|KWZ98303.1|	853	1021	962	8.37e-156	34.823	Anaerococcus hydrogenalis
LCVA_556	556	gi|690786486|gb|KGF33248.1|	853	1021	983	7.86e-159	34.588	Peptoniphilus lacrimalis DNF00528
LCVA_559	559	gi|514590074|gb|EPI51561.1|	134	139	134	1.38e-66	67.91	Gardnerella vaginalis JCP8017A
LCVA_559	559	gi|1333047635|gb|PNP86797.1|	134	139	134	3.08e-67	67.91	Gardnerella vaginalis
LCVA_559	559	gi|998237421|gb|KXI16083.1|	134	139	134	5.15e-67	67.91	Gardnerella vaginalis
LCVA_560	560	gi|1333050980|gb|PNP90054.1|	305	306	303	0	88.119	Gardnerella sp. KA00735
LCVA_560	560	gi|1333047636|gb|PNP86798.1|	305	306	303	0	87.459	Gardnerella vaginalis
LCVA_560	560	gi|998237420|gb|KXI16082.1|	305	306	303	0	87.129	Gardnerella vaginalis
LCVA_561	561	gi|514590650|gb|EPI52091.1|	133	135	133	1.9e-36	48.872	Gardnerella vaginalis JCP7719
LCVA_561	561	gi|297532163|gb|EFH71136.1|	133	135	130	1.4e-35	47.692	Gardnerella vaginalis 5-1
LCVA_561	561	gi|1334004668|gb|PNS43920.1|	133	136	134	1.95e-33	46.269	Gardnerella vaginalis
LCVA_562	562	gi|690755424|gb|KGF04314.1|	58	440	36	0.47	36.111	Anaerococcus lactolyticus S7-1-13
LCVA_562	562	gi|909820494|gb|AKU03780.1|	58	53	48	0.018	35.417	Streptococcus agalactiae
LCVA_563	563	gi|985288809|gb|KWZ74281.1|	588	478	441	3.83e-118	46.032	Winkia neuii
LCVA_563	563	gi|987370354|gb|KXB82178.1|	588	416	397	3.71e-107	43.829	Varibaculum cambriense
LCVA_563	563	gi|985288991|gb|KWZ74463.1|	588	416	407	2.62e-101	40.541	Winkia neuii
LCVA_564	564	gi|987328558|gb|KXB42262.1|	525	474	449	0	83.742	Clostridiales bacterium KA00274
LCVA_564	564	gi|1418403006|gb|AWZ30107.1|	525	520	528	0	53.409	Streptococcus agalactiae
LCVA_564	564	gi|909820492|gb|AKU03778.1|	525	520	528	0	53.409	Streptococcus agalactiae
LCVA_565	565	gi|1334004259|gb|PNS43535.1|	793	862	864	0	69.444	Gardnerella vaginalis
LCVA_565	565	gi|1331367937|gb|PNH19744.1|	793	880	629	0	58.506	Mageeibacillus indolicus
LCVA_566	566	gi|985311478|gb|KWZ95940.1|	702	976	645	0	96.279	Anaerococcus hydrogenalis
LCVA_567	567	gi|985311477|gb|KWZ95939.1|	228	228	228	3.99e-148	88.596	Anaerococcus hydrogenalis
LCVA_568	568	gi|690783722|gb|KGF30612.1|	140	118	118	1e-78	95.763	Peptoniphilus lacrimalis DNF00528
LCVA_568	568	gi|1446049927|gb|RDY21299.1|	140	118	118	7.87e-78	94.915	Criibacterium bergeronii
LCVA_568	568	gi|985315759|gb|KXA00124.1|	140	118	118	2e-78	94.915	Anaerococcus hydrogenalis
LCVA_569	569	gi|1249064891|gb|PCN56195.1|	360	360	359	0	97.772	Clostridioides difficile
LCVA_569	569	gi|985348764|gb|KXA31491.1|	360	360	360	0	96.389	Peptoniphilus harei
LCVA_569	569	gi|987334058|gb|KXB47551.1|	360	360	359	0	94.708	Tissierellia bacterium KA00581
LCVA_570	570	gi|1249064892|gb|PCN56196.1|	62	160	57	9.07e-33	96.491	Clostridioides difficile
LCVA_570	570	gi|690758968|gb|KGF07488.1|	62	160	57	5.49e-32	94.737	Tissierellia bacterium S5-A11
LCVA_570	570	gi|985348765|gb|KXA31492.1|	62	160	57	2.61e-30	89.474	Peptoniphilus harei
LCVA_571	571	gi|985292056|gb|KWZ77326.1|	87	141	82	5.51e-34	68.293	Anaerococcus tetradius
LCVA_571	571	gi|690758603|gb|KGF07165.1|	87	472	82	1.63e-30	64.634	Tissierellia bacterium S7-1-4
LCVA_571	571	gi|987334442|gb|KXB47909.1|	87	464	78	1.44e-26	64.103	Tissierellia bacterium KA00581
LCVA_572	572	gi|987351836|gb|KXB64597.1|	57	522	48	3.43e-25	91.667	Parvimonas sp. KA00067
LCVA_572	572	gi|667703877|gb|KFA56857.1|	57	522	48	4.84e-25	91.667	Mageeibacillus indolicus
LCVA_572	572	gi|1331366255|gb|PNH18070.1|	57	522	48	5.24e-25	91.667	Mageeibacillus indolicus
LCVA_573	573	gi|1002879310|gb|KXU56768.1|	39	284	32	1.6	37.5	Streptococcus salivarius
LCVA_573	573	gi|987355997|gb|KXB68608.1|	39	197	36	0.67	33.333	Leptotrichia wadei
LCVA_574	574	EGG83019.1	469	258	150	3.43e-24	39.333	Lachnospiraceae_bacterium_2_1_46FAA
LCVA_574	574	WP_006905465.1	469	249	156	5.73e-26	37.821	Shuttleworthia_satelles
LCVA_574	574	EEP29077.1	469	249	156	5.73e-26	37.821	Shuttleworthia_satelles
LCVA_576	576	WP_074714911.1	431	357	294	1.46e-37	35.374	Lachnobacterium_bovis
LCVA_576	576	SDX84396.1	431	357	294	1.46e-37	35.374	Lachnobacterium_bovis_DSM_14045
LCVA_577	577	WP_074714913.1	232	248	222	2.69e-85	56.757	Lachnobacterium_bovis
LCVA_577	577	SDX84425.1	232	248	222	2.69e-85	56.757	Lachnobacterium_bovis_DSM_14045
LCVA_577	577	EEP29060.1	232	265	229	7.16e-85	54.585	Shuttleworthia_satelles
LCVA_578	578	WP_006905839.1	236	237	223	1.93e-108	64.574	Shuttleworthia_satelles
LCVA_578	578	EEP29451.1	236	237	223	1.93e-108	64.574	Shuttleworthia_satelles
LCVA_578	578	gi|987351019|gb|KXB63812.1|	236	242	230	1.42e-56	38.261	Olsenella sp. DNF00959
LCVA_579	579	WP_006905447.1	674	675	670	0	55.821	Shuttleworthia_satelles
LCVA_579	579	EEP29059.1	674	675	670	0	55.821	Shuttleworthia_satelles
LCVA_579	579	gi|1249066818|gb|PCN58086.1|	674	674	672	4.79e-150	39.732	Clostridioides difficile
LCVA_580	580	WP_006905838.1	402	406	405	0	61.728	Shuttleworthia_satelles
LCVA_580	580	EEP29450.1	402	406	405	0	61.728	Shuttleworthia_satelles
LCVA_580	580	gi|690767131|gb|KGF15056.1|	402	405	388	1.34e-123	49.227	Peptostreptococcus sp. MV1
LCVA_581	581	WP_074715956.1	507	509	506	0	62.253	Lachnobacterium_bovis
LCVA_581	581	SDY01683.1	507	509	506	0	62.253	Lachnobacterium_bovis_DSM_14045
LCVA_581	581	gi|690760895|gb|KGF09302.1|	507	512	504	0	59.127	Clostridiales bacterium S5-A14a
LCVA_582	582	WP_074718470.1	464	463	467	3.48e-119	41.542	Lachnobacterium_bovis
LCVA_582	582	SDY60712.1	464	463	467	3.48e-119	41.542	Lachnobacterium_bovis_DSM_14045
LCVA_582	582	gi|690801445|gb|KGF46749.1|	464	472	454	1.14e-111	38.326	Veillonella montpellierensis DNF00314
LCVA_584	584	gi|987335683|gb|KXB49083.1|	497	494	496	0	72.984	Coriobacteriales bacterium DNF00809
LCVA_584	584	gi|327490928|gb|EGF22706.1|	497	494	496	0	72.379	Atopobium vaginae DSM 15829
LCVA_584	584	gi|1001050643|gb|KXO15824.1|	497	496	495	0	68.687	Clostridiales bacterium KA00134
LCVA_586	586	EGG84872.1	152	148	148	3.97e-64	61.486	Lachnospiraceae_bacterium_2_1_46FAA
LCVA_586	586	WP_074715114.1	152	152	150	7.52e-60	60	Lachnobacterium_bovis
LCVA_586	586	SDX86311.1	152	152	150	7.52e-60	60	Lachnobacterium_bovis_DSM_14045
LCVA_587	587	WP_083354472.1	129	126	116	2e-49	57.759	Lachnobacterium_bovis
LCVA_587	587	SDY28846.1	129	121	116	1.69e-49	57.759	Lachnobacterium_bovis_DSM_14045
LCVA_587	587	gi|987377719|gb|KXB89235.1|	129	122	113	2.52e-45	55.752	Veillonellaceae bacterium DNF00626
LCVA_588	588	gi|987377722|gb|KXB89238.1|	633	644	631	0	56.577	Veillonellaceae bacterium DNF00626
LCVA_588	588	WP_074718181.1	633	641	632	0	56.487	Lachnobacterium_bovis
LCVA_588	588	SDY53740.1	633	641	632	0	56.487	Lachnobacterium_bovis_DSM_14045
LCVA_589	589	WP_074715186.1	159	160	160	3.68e-69	61.875	Lachnobacterium_bovis
LCVA_589	589	SDX87089.1	159	160	160	3.68e-69	61.875	Lachnobacterium_bovis_DSM_14045
LCVA_589	589	EGG84843.1	159	159	159	8e-69	61.635	Lachnospiraceae_bacterium_2_1_46FAA
LCVA_592	592	gi|987351144|gb|KXB63937.1|	513	507	509	7.14e-148	42.043	Olsenella sp. DNF00959
LCVA_592	592	gi|327491676|gb|EGF23450.1|	513	525	529	8.35e-145	41.777	Atopobium vaginae DSM 15829
LCVA_592	592	gi|996352457|gb|KXG90297.1|	513	525	529	4.4e-145	41.588	Atopobium vaginae
LCVA_593	593	gi|996352458|gb|KXG90298.1|	400	443	424	4.54e-66	33.491	Atopobium vaginae
LCVA_593	593	gi|327491677|gb|EGF23451.1|	400	443	424	1.43e-65	33.255	Atopobium vaginae DSM 15829
LCVA_593	593	gi|987351145|gb|KXB63938.1|	400	424	401	6.82e-76	32.419	Olsenella sp. DNF00959
LCVA_594	594	gi|327491678|gb|EGF23452.1|	76	81	73	7.84e-21	47.945	Atopobium vaginae DSM 15829
LCVA_594	594	gi|690782553|gb|KGF29517.1|	76	73	74	3.47e-12	47.297	Peptoniphilus lacrimalis DNF00528
LCVA_594	594	gi|987351146|gb|KXB63939.1|	76	84	74	2.17e-19	43.243	Olsenella sp. DNF00959
LCVA_595	595	WP_074717698.1	234	235	229	8.69e-97	59.825	Lachnobacterium_bovis
LCVA_595	595	SDY42120.1	234	235	229	8.69e-97	59.825	Lachnobacterium_bovis_DSM_14045
LCVA_595	595	gi|909819995|gb|AKU03281.1|	234	234	225	5.05e-76	48	Streptococcus agalactiae
LCVA_596	596	SDY42093.1	538	563	551	8.18e-99	36.116	Lachnobacterium_bovis_DSM_14045
LCVA_596	596	WP_143470231.1	538	525	544	1.55e-95	35.846	Lachnobacterium_bovis
LCVA_597	597	gi|690761699|gb|KGF10059.1|	585	581	580	0	48.103	Clostridiales bacterium S5-A14a
LCVA_597	597	WP_083354544.1	585	672	576	2.1e-140	38.889	Lachnobacterium_bovis
LCVA_597	597	SDY64484.1	585	672	576	2.1e-140	38.889	Lachnobacterium_bovis_DSM_14045
LCVA_598	598	WP_074718028.1	706	702	706	3.56e-169	38.952	Lachnobacterium_bovis
LCVA_598	598	SDY49768.1	706	702	706	3.56e-169	38.952	Lachnobacterium_bovis_DSM_14045
LCVA_599	599	WP_083790716.1	235	225	227	6.93e-36	33.921	Shuttleworthia_satelles
LCVA_599	599	EEP29159.1	235	214	227	4.72e-36	33.921	Shuttleworthia_satelles
LCVA_600	600	WP_006905546.1	229	229	229	2.08e-124	70.742	Shuttleworthia_satelles
LCVA_600	600	EEP29158.1	229	229	229	2.08e-124	70.742	Shuttleworthia_satelles
LCVA_600	600	WP_074716575.1	229	230	227	3.05e-117	69.604	Lachnobacterium_bovis
LCVA_601	601	WP_006905545.1	556	499	470	2.68e-134	44.681	Shuttleworthia_satelles
LCVA_601	601	EEP29157.1	556	499	470	2.68e-134	44.681	Shuttleworthia_satelles
LCVA_601	601	EGG79514.1	556	486	485	1.19e-131	41.649	Lachnospiraceae_bacterium_2_1_46FAA
LCVA_602	602	EGG79515.1	308	306	285	1.07e-46	36.842	Lachnospiraceae_bacterium_2_1_46FAA
LCVA_602	602	WP_006905544.1	308	308	282	8.74e-47	33.333	Shuttleworthia_satelles
LCVA_602	602	EEP29156.1	308	308	282	8.74e-47	33.333	Shuttleworthia_satelles
LCVA_603	603	WP_074716569.1	666	869	555	1.21e-34	26.847	Lachnobacterium_bovis
LCVA_603	603	WP_006905543.1	666	886	588	8.21e-35	24.83	Shuttleworthia_satelles
LCVA_603	603	EEP29155.1	666	886	588	8.21e-35	24.83	Shuttleworthia_satelles
LCVA_604	604	SDY17261.1	87	87	86	7.38e-29	62.791	Lachnobacterium_bovis_DSM_14045
LCVA_604	604	WP_006905540.1	87	87	86	5.26e-30	61.628	Shuttleworthia_satelles
LCVA_604	604	EEP29152.1	87	87	86	5.26e-30	61.628	Shuttleworthia_satelles
LCVA_605	605	WP_074716567.1	332	329	325	2.37e-58	33.538	Lachnobacterium_bovis
LCVA_605	605	WP_083790715.1	332	348	329	2.76e-66	32.219	Shuttleworthia_satelles
LCVA_605	605	EEP29153.1	332	334	329	1.72e-66	32.219	Shuttleworthia_satelles
LCVA_606	606	WP_143470210.1	603	604	603	0	80.431	Lachnobacterium_bovis
LCVA_606	606	SDY17236.1	603	603	603	0	80.431	Lachnobacterium_bovis_DSM_14045
LCVA_606	606	EGG79518.1	603	604	602	0	80.066	Lachnospiraceae_bacterium_2_1_46FAA
LCVA_607	607	WP_074716560.1	385	391	388	8.18e-125	44.845	Lachnobacterium_bovis
LCVA_607	607	SDY17212.1	385	391	388	8.18e-125	44.845	Lachnobacterium_bovis_DSM_14045
LCVA_607	607	WP_083790714.1	385	429	425	6.23e-129	44.706	Shuttleworthia_satelles
LCVA_608	608	EGG79523.1	355	347	339	2.25e-138	59.882	Lachnospiraceae_bacterium_2_1_46FAA
LCVA_608	608	WP_074716558.1	355	366	338	9.97e-147	59.172	Lachnobacterium_bovis
LCVA_608	608	SDY17191.1	355	366	338	9.97e-147	59.172	Lachnobacterium_bovis_DSM_14045
LCVA_609	609	EGG79524.1	219	202	141	2.75e-60	60.993	Lachnospiraceae_bacterium_2_1_46FAA
LCVA_609	609	WP_006905532.1	219	238	191	1.71e-67	57.068	Shuttleworthia_satelles
LCVA_609	609	EEP29144.1	219	238	191	1.71e-67	57.068	Shuttleworthia_satelles
LCVA_610	610	WP_006905531.1	628	624	631	0	81.458	Shuttleworthia_satelles
LCVA_610	610	EEP29143.1	628	624	631	0	81.458	Shuttleworthia_satelles
LCVA_610	610	WP_074716556.1	628	627	628	0	79.299	Lachnobacterium_bovis
LCVA_611	611	EGG79526.1	390	395	379	1.99e-172	64.644	Lachnospiraceae_bacterium_2_1_46FAA
LCVA_611	611	WP_006905530.1	390	394	385	1e-167	64.416	Shuttleworthia_satelles
LCVA_611	611	EEP29142.1	390	394	385	1e-167	64.416	Shuttleworthia_satelles
LCVA_612	612	WP_074716603.1	384	384	384	5.27e-168	59.375	Lachnobacterium_bovis
LCVA_612	612	SDY17033.1	384	384	384	5.27e-168	59.375	Lachnobacterium_bovis_DSM_14045
LCVA_612	612	EGG84046.1	384	385	384	3.79e-153	54.167	Lachnospiraceae_bacterium_2_1_46FAA
LCVA_613	613	WP_074716549.1	396	396	395	0	66.329	Lachnobacterium_bovis
LCVA_613	613	SDY17008.1	396	396	395	0	66.329	Lachnobacterium_bovis_DSM_14045
LCVA_613	613	EGG84045.1	396	394	393	0	63.868	Lachnospiraceae_bacterium_2_1_46FAA
LCVA_614	614	WP_074716547.1	77	77	77	3.53e-33	63.636	Lachnobacterium_bovis
LCVA_614	614	SDY16985.1	77	77	77	3.53e-33	63.636	Lachnobacterium_bovis_DSM_14045
LCVA_614	614	EEP29130.1	77	78	75	1.37e-31	61.333	Shuttleworthia_satelles
LCVA_615	615	WP_074716545.1	442	436	435	3.09e-176	53.793	Lachnobacterium_bovis
LCVA_615	615	SDY16966.1	442	436	435	3.09e-176	53.793	Lachnobacterium_bovis_DSM_14045
LCVA_615	615	EEP29129.1	442	450	443	3.92e-175	51.919	Shuttleworthia_satelles
LCVA_616	616	WP_074716544.1	88	87	87	9.25e-41	67.816	Lachnobacterium_bovis
LCVA_616	616	SDY16938.1	88	87	87	9.25e-41	67.816	Lachnobacterium_bovis_DSM_14045
LCVA_616	616	EGG84042.1	88	87	87	4.99e-43	67.816	Lachnospiraceae_bacterium_2_1_46FAA
LCVA_617	617	WP_074716542.1	143	144	139	5.56e-42	46.763	Lachnobacterium_bovis
LCVA_617	617	SDY16913.1	143	144	139	5.56e-42	46.763	Lachnobacterium_bovis_DSM_14045
LCVA_617	617	gi|987339556|gb|KXB52866.1|	143	143	136	7.72e-39	45.588	Lachnoanaerobaculum saburreum
LCVA_618	618	WP_074716541.1	83	86	80	7.96e-13	40	Lachnobacterium_bovis
LCVA_618	618	SDY16887.1	83	86	80	7.96e-13	40	Lachnobacterium_bovis_DSM_14045
LCVA_618	618	gi|1331369226|gb|PNH21019.1|	83	97	83	8.1e-14	38.554	Lachnospiraceae bacterium
LCVA_619	619	EGG84038.1	554	555	556	0	69.065	Lachnospiraceae_bacterium_2_1_46FAA
LCVA_619	619	WP_074716539.1	554	560	548	0	66.788	Lachnobacterium_bovis
LCVA_619	619	SDY16865.1	554	558	548	0	66.788	Lachnobacterium_bovis_DSM_14045
LCVA_620	620	WP_074716536.1	213	214	210	1.09e-61	44.762	Lachnobacterium_bovis
LCVA_620	620	SDY16813.1	213	214	210	1.09e-61	44.762	Lachnobacterium_bovis_DSM_14045
LCVA_620	620	EGG84037.1	213	213	210	2.76e-63	43.333	Lachnospiraceae_bacterium_2_1_46FAA
LCVA_621	621	EGG84036.1	408	409	405	0	65.185	Lachnospiraceae_bacterium_2_1_46FAA
LCVA_621	621	WP_074716534.1	408	418	413	0	63.438	Lachnobacterium_bovis
LCVA_621	621	SDY16796.1	408	418	413	0	63.438	Lachnobacterium_bovis_DSM_14045
LCVA_622	622	EGG79365.1	361	366	361	4.43e-138	54.571	Lachnospiraceae_bacterium_2_1_46FAA
LCVA_622	622	WP_074716520.1	361	366	361	5.03e-131	50.97	Lachnobacterium_bovis
LCVA_622	622	SDY16570.1	361	366	361	5.03e-131	50.97	Lachnobacterium_bovis_DSM_14045
LCVA_623	623	EGG79367.1	384	377	371	0	72.507	Lachnospiraceae_bacterium_2_1_46FAA
LCVA_623	623	WP_074716518.1	384	386	373	0	71.046	Lachnobacterium_bovis
LCVA_623	623	SDY16547.1	384	386	373	0	71.046	Lachnobacterium_bovis_DSM_14045
LCVA_624	624	EGG79368.1	115	90	84	1.84e-39	65.476	Lachnospiraceae_bacterium_2_1_46FAA
LCVA_624	624	WP_006905072.1	115	121	86	2.64e-39	62.791	Shuttleworthia_satelles
LCVA_624	624	EEP28684.1	115	121	86	2.64e-39	62.791	Shuttleworthia_satelles
LCVA_625	625	WP_074718763.1	456	451	460	0	63.478	Lachnobacterium_bovis
LCVA_625	625	WP_045000012.1	456	453	457	0	62.582	Shuttleworthia_satelles
LCVA_625	625	EEP28681.1	456	482	457	0	62.582	Shuttleworthia_satelles
LCVA_626	626	WP_006905063.1	736	606	324	8.79e-22	25.617	Shuttleworthia_satelles
LCVA_626	626	EEP28675.1	736	606	324	8.79e-22	25.617	Shuttleworthia_satelles
LCVA_626	626	EGG80627.1	736	466	328	0.19	22.866	Lachnospiraceae_bacterium_2_1_46FAA
LCVA_627	627	WP_006905062.1	830	811	817	0	56.916	Shuttleworthia_satelles
LCVA_627	627	EEP28674.1	830	811	817	0	56.916	Shuttleworthia_satelles
LCVA_627	627	WP_074717278.1	830	814	814	0	55.037	Lachnobacterium_bovis
LCVA_628	628	WP_074717276.1	135	137	134	2.04e-34	46.269	Lachnobacterium_bovis
LCVA_628	628	SDY33910.1	135	137	134	2.04e-34	46.269	Lachnobacterium_bovis_DSM_14045
LCVA_628	628	EGG81480.1	135	137	136	5.9e-35	43.382	Lachnospiraceae_bacterium_2_1_46FAA
LCVA_629	629	EGG81479.1	454	450	452	0	63.938	Lachnospiraceae_bacterium_2_1_46FAA
LCVA_629	629	WP_006905060.1	454	459	444	0	62.162	Shuttleworthia_satelles
LCVA_629	629	EEP28672.1	454	459	444	0	62.162	Shuttleworthia_satelles
LCVA_638	638	WP_074718690.1	180	180	180	1.89e-70	57.222	Lachnobacterium_bovis
LCVA_638	638	SDY66172.1	180	180	180	1.89e-70	57.222	Lachnobacterium_bovis_DSM_14045
LCVA_638	638	EGG79546.1	180	181	174	9.12e-70	56.897	Lachnospiraceae_bacterium_2_1_46FAA
LCVA_639	639	EGG79550.1	472	468	474	0	64.979	Lachnospiraceae_bacterium_2_1_46FAA
LCVA_639	639	WP_006905923.1	472	468	471	0	62.633	Shuttleworthia_satelles
LCVA_639	639	EEP28104.1	472	468	471	0	62.633	Shuttleworthia_satelles
LCVA_640	640	WP_074718694.1	149	147	135	4.03e-44	54.074	Lachnobacterium_bovis
LCVA_640	640	WP_006905922.1	149	144	134	1.88e-47	49.254	Shuttleworthia_satelles
LCVA_640	640	EEP28103.1	149	144	134	1.88e-47	49.254	Shuttleworthia_satelles
LCVA_641	641	EGG79552.1	249	246	246	5.39e-120	65.854	Lachnospiraceae_bacterium_2_1_46FAA
LCVA_641	641	WP_006905921.1	249	246	244	4.71e-122	65.164	Shuttleworthia_satelles
LCVA_641	641	EEP28102.1	249	246	244	4.71e-122	65.164	Shuttleworthia_satelles
LCVA_642	642	gi|987361495|gb|KXB73787.1|	193	217	191	3.27e-38	42.408	Peptostreptococcus anaerobius
LCVA_642	642	EGG79553.1	193	202	190	6.39e-41	38.947	Lachnospiraceae_bacterium_2_1_46FAA
LCVA_642	642	WP_074718696.1	193	199	193	3.99e-38	35.751	Lachnobacterium_bovis
LCVA_642	642	SDY66290.1	193	199	193	3.99e-38	35.751	Lachnobacterium_bovis_DSM_14045
LCVA_643	643	gi|985346186|gb|KXA29002.1|	476	478	474	0	63.291	Peptoniphilus harei
LCVA_643	643	gi|1595987071|gb|TDM79125.1|	476	477	474	0	62.025	Lactobacillus crispatus
LCVA_643	643	gi|1595978525|gb|TDM71879.1|	476	477	474	0	62.025	Lactobacillus crispatus
LCVA_644	644	gi|757404205|gb|KIS08704.1|	234	234	234	2.52e-93	57.692	Streptococcus equi subsp. zooepidemicus Sz16
LCVA_644	644	gi|649932372|gb|KDS82464.1|	234	236	234	5.45e-97	57.265	Lactobacillus rhamnosus 51B
LCVA_644	644	gi|731958575|gb|KHJ57589.1|	234	236	234	5.39e-97	57.265	Lactobacillus rhamnosus
LCVA_645	645	gi|1125676451|gb|OLF49555.1|	382	385	381	3.39e-146	55.118	Streptococcus acidominimus
LCVA_645	645	gi|985324845|gb|KXA08802.1|	382	382	381	3.68e-139	51.969	Enterococcus faecium
LCVA_645	645	gi|909819586|gb|AKU02872.1|	382	382	381	4.04e-136	50.394	Streptococcus agalactiae
LCVA_646	646	WP_074716058.1	339	339	339	0	91.445	Lachnobacterium_bovis
LCVA_646	646	SDY05151.1	339	339	339	0	91.445	Lachnobacterium_bovis_DSM_14045
LCVA_646	646	EEP28094.1	339	339	339	0	89.381	Shuttleworthia_satelles
LCVA_647	647	WP_074716060.1	402	406	406	0	70.936	Lachnobacterium_bovis
LCVA_647	647	SDY05176.1	402	406	406	0	70.936	Lachnobacterium_bovis_DSM_14045
LCVA_647	647	WP_006905912.1	402	405	404	0	70.05	Shuttleworthia_satelles
LCVA_648	648	gi|987340756|gb|KXB54041.1|	248	249	248	1.28e-132	70.968	Lachnoanaerobaculum saburreum
LCVA_648	648	WP_074716062.1	248	249	248	1.79e-128	67.339	Lachnobacterium_bovis
LCVA_648	648	SDY05203.1	248	249	248	1.79e-128	67.339	Lachnobacterium_bovis_DSM_14045
LCVA_650	650	WP_074716068.1	484	483	484	0	74.38	Lachnobacterium_bovis
LCVA_650	650	SDY05301.1	484	483	484	0	74.38	Lachnobacterium_bovis_DSM_14045
LCVA_650	650	EEP28087.1	484	484	485	0	73.608	Shuttleworthia_satelles
LCVA_651	651	gi|987335479|gb|KXB48886.1|	143	142	141	1.4e-51	53.901	Coriobacteriales bacterium DNF00809
LCVA_651	651	gi|1331369344|gb|PNH21135.1|	143	145	138	6.44e-30	36.232	Megasphaera genomosp. type_2
LCVA_651	651	gi|690765052|gb|KGF13152.1|	143	143	140	7.41e-29	35.714	Atopobium parvulum DNF00906
LCVA_652	652	gi|667704820|gb|KFA57702.1|	490	491	490	0	71.02	Mageeibacillus indolicus
LCVA_652	652	gi|1331366555|gb|PNH18368.1|	490	491	490	0	71.02	Mageeibacillus indolicus
LCVA_652	652	gi|690790322|gb|KGF36784.1|	490	490	490	0	68.571	Peptoniphilus lacrimalis DNF00528
LCVA_653	653	gi|1446050849|gb|RDY22213.1|	49	725	39	0.000206	46.154	Criibacterium bergeronii
LCVA_653	653	WP_156784478.1	49	59	38	0.29	31.579	Shuttleworthia_satelles
LCVA_654	654	gi|987352520|gb|KXB65272.1|	540	733	283	3.07e-80	54.064	Parvimonas sp. KA00067
LCVA_654	654	gi|987352769|gb|KXB65509.1|	540	621	566	1.71e-95	39.223	Parvimonas sp. KA00067
LCVA_655	655	gi|690755459|gb|KGF04344.1|	235	235	234	1.5e-143	81.624	Anaerococcus lactolyticus S7-1-13
LCVA_655	655	gi|985294234|gb|KWZ79341.1|	235	235	234	3.06e-144	81.197	Anaerococcus tetradius
LCVA_655	655	gi|690759712|gb|KGF08193.1|	235	235	234	3.27e-142	79.487	Tissierellia bacterium S5-A11
LCVA_656	656	gi|693443438|gb|KGI60815.1|	289	272	272	3.14e-90	45.956	Prevotella sp. S7 MS 2
LCVA_656	656	gi|987372324|gb|KXB84054.1|	289	272	272	6.43e-89	45.588	Prevotella sp. DNF00663
LCVA_656	656	gi|987332494|gb|KXB46058.1|	289	272	272	4.86e-90	44.118	Bacteroidales bacterium KA00344
LCVA_657	657	WP_044960887.1	84	83	82	9.08e-35	58.537	Shuttleworthia_satelles
LCVA_657	657	EEP28085.1	84	84	82	1.33e-34	58.537	Shuttleworthia_satelles
LCVA_657	657	EGG83023.1	84	80	82	4.76e-25	51.22	Lachnospiraceae_bacterium_2_1_46FAA
LCVA_658	658	WP_074716085.1	695	721	647	0	50.232	Lachnobacterium_bovis
LCVA_658	658	SDY05523.1	695	712	647	0	50.232	Lachnobacterium_bovis_DSM_14045
LCVA_658	658	gi|987341633|gb|KXB54884.1|	695	713	638	0	50.157	Lachnoanaerobaculum saburreum
LCVA_659	659	SDY07922.1	157	155	148	3.54e-78	74.324	Lachnobacterium_bovis_DSM_14045
LCVA_659	659	EGG83021.1	157	155	151	3.41e-74	70.861	Lachnospiraceae_bacterium_2_1_46FAA
LCVA_659	659	EEP28083.1	157	156	144	6e-72	67.361	Shuttleworthia_satelles
LCVA_660	660	gi|514586859|gb|EPI48769.1|	253	269	269	4.54e-142	70.26	Gardnerella vaginalis JCP8108
LCVA_660	660	gi|514588870|gb|EPI50472.1|	253	269	269	9.15e-142	69.888	Gardnerella vaginalis JCP7719
LCVA_660	660	gi|514586327|gb|EPI48263.1|	253	269	269	1.33e-141	69.145	Gardnerella_vaginalis_JCP7275
LCVA_661	661	gi|987344527|gb|KXB57656.1|	154	152	142	3.12e-68	71.831	Gemella haemolysans
LCVA_661	661	gi|1604458683|gb|TFF64201.1|	154	147	145	1.26e-61	65.517	Helcococcus ovis
LCVA_661	661	gi|987345525|gb|KXB58560.1|	154	147	142	2.44e-62	61.268	Gemella asaccharolytica
LCVA_662	662	EGG84736.1	183	179	173	4.64e-81	65.896	Lachnospiraceae_bacterium_2_1_46FAA
LCVA_662	662	WP_074714784.1	183	195	178	8.05e-80	63.483	Lachnobacterium_bovis
LCVA_662	662	SDX82865.1	183	195	178	8.05e-80	63.483	Lachnobacterium_bovis_DSM_14045
LCVA_663	663	EGG84739.1	344	334	328	3.36e-168	65.244	Lachnospiraceae_bacterium_2_1_46FAA
LCVA_663	663	gi|1249066676|gb|PCN57947.1|	344	333	329	9.62e-131	54.407	Clostridioides difficile
LCVA_663	663	gi|1357789339|gb|PRO98984.1|	562	344	379	9.32e-131	51.497	Escherichia coli
LCVA_664	664	WP_074714792.1	381	362	372	5.2e-73	37.366	Lachnobacterium_bovis
LCVA_664	664	SDX82957.1	381	362	372	5.2e-73	37.366	Lachnobacterium_bovis_DSM_14045
LCVA_664	664	WP_156784487.1	381	379	318	2.76e-63	34.277	Shuttleworthia_satelles
LCVA_665	665	gi|987343648|gb|KXB56826.1|	524	506	519	8.87e-153	44.509	Lachnoanaerobaculum saburreum
LCVA_665	665	WP_006906311.1	524	518	514	4.8e-160	44.163	Shuttleworthia_satelles
LCVA_665	665	EEP28493.1	524	518	514	4.8e-160	44.163	Shuttleworthia_satelles
LCVA_666	666	EGG84030.1	694	688	689	0	66.038	Lachnospiraceae_bacterium_2_1_46FAA
LCVA_666	666	WP_006906309.1	694	692	687	0	63.901	Shuttleworthia_satelles
LCVA_666	666	EEP28491.1	694	692	687	0	63.901	Shuttleworthia_satelles
LCVA_667	667	EGG84029.1	260	260	256	8.91e-130	70.703	Lachnospiraceae_bacterium_2_1_46FAA
LCVA_667	667	WP_074714798.1	260	262	263	1.47e-122	69.202	Lachnobacterium_bovis
LCVA_667	667	SDX83026.1	260	262	263	1.47e-122	69.202	Lachnobacterium_bovis_DSM_14045
LCVA_668	668	WP_074714800.1	131	131	127	1.39e-34	44.882	Lachnobacterium_bovis
LCVA_668	668	SDX83057.1	131	131	127	1.39e-34	44.882	Lachnobacterium_bovis_DSM_14045
LCVA_669	669	WP_074714802.1	149	147	147	1.26e-70	66.667	Lachnobacterium_bovis
LCVA_669	669	SDX83086.1	149	147	147	1.26e-70	66.667	Lachnobacterium_bovis_DSM_14045
LCVA_669	669	gi|1446050784|gb|RDY22148.1|	149	149	149	3.48e-37	43.624	Criibacterium bergeronii
LCVA_670	670	WP_074715337.1	109	101	76	2.12e-27	57.895	Lachnobacterium_bovis
LCVA_670	670	SDX83123.1	109	102	76	2.27e-27	57.895	Lachnobacterium_bovis_DSM_14045
LCVA_671	671	WP_074714804.1	538	535	544	1.97e-130	40.441	Lachnobacterium_bovis
LCVA_671	671	SDX83156.1	538	535	544	1.97e-130	40.441	Lachnobacterium_bovis_DSM_14045
LCVA_672	672	WP_074714807.1	335	334	332	0	81.627	Lachnobacterium_bovis
LCVA_672	672	SDX83184.1	335	334	332	0	81.627	Lachnobacterium_bovis_DSM_14045
LCVA_672	672	gi|985300810|gb|KWZ85609.1|	335	337	337	5.56e-158	63.501	Bacillus coagulans
LCVA_673	673	WP_083354391.1	289	115	114	2.18e-24	39.474	Lachnobacterium_bovis
LCVA_673	673	SDX83216.1	289	261	197	2.17e-34	36.548	Lachnobacterium_bovis_DSM_14045
LCVA_674	674	WP_074714812.1	441	456	437	0	75.057	Lachnobacterium_bovis
LCVA_674	674	SDX83246.1	441	456	437	0	75.057	Lachnobacterium_bovis_DSM_14045
LCVA_674	674	gi|1446050779|gb|RDY22143.1|	441	432	425	0	61.176	Criibacterium bergeronii
LCVA_675	675	WP_074714815.1	147	151	149	3.26e-29	42.282	Lachnobacterium_bovis
LCVA_675	675	SDX83278.1	147	153	149	3.02e-29	42.282	Lachnobacterium_bovis_DSM_14045
LCVA_676	676	WP_074714818.1	291	282	239	3.9e-71	51.883	Lachnobacterium_bovis
LCVA_676	676	SDX83310.1	291	282	239	3.9e-71	51.883	Lachnobacterium_bovis_DSM_14045
LCVA_677	677	WP_074714820.1	537	501	419	1.4e-34	28.162	Lachnobacterium_bovis
LCVA_677	677	SDX83336.1	537	501	419	1.4e-34	28.162	Lachnobacterium_bovis_DSM_14045
LCVA_678	678	WP_074714823.1	250	250	211	7.2e-40	38.389	Lachnobacterium_bovis
LCVA_678	678	SDX83366.1	250	250	211	7.2e-40	38.389	Lachnobacterium_bovis_DSM_14045
LCVA_679	679	WP_074714825.1	135	136	134	1.42e-38	48.507	Lachnobacterium_bovis
LCVA_679	679	SDX83396.1	135	136	134	1.42e-38	48.507	Lachnobacterium_bovis_DSM_14045
LCVA_679	679	gi|985290926|gb|KWZ76307.1|	135	151	112	1.12e-14	34.821	Bacillus coagulans
LCVA_680	680	WP_074714828.1	559	518	571	1e-160	49.037	Lachnobacterium_bovis
LCVA_680	680	SDX83425.1	559	518	571	1e-160	49.037	Lachnobacterium_bovis_DSM_14045
LCVA_681	681	gi|987328432|gb|KXB42143.1|	187	187	187	1.33e-132	97.861	Clostridiales bacterium KA00274
LCVA_681	681	gi|1331368646|gb|PNH20444.1|	187	182	182	4.4e-56	54.396	Megasphaera genomosp. type_2
LCVA_681	681	gi|1331370642|gb|PNH22392.1|	187	182	182	5.98e-56	54.396	Megasphaera genomosp. type_2
LCVA_682	682	gi|987328433|gb|KXB42144.1|	262	264	262	0	94.656	Clostridiales bacterium KA00274
LCVA_682	682	gi|1333047810|gb|PNP86955.1|	262	264	260	5.47e-147	74.231	Gardnerella vaginalis
LCVA_682	682	gi|987347585|gb|KXB60511.1|	262	297	264	1.17e-148	73.106	Gemella haemolysans
LCVA_683	683	WP_074714831.1	264	264	265	1.53e-120	66.415	Lachnobacterium_bovis
LCVA_683	683	SDX83452.1	264	264	265	1.53e-120	66.415	Lachnobacterium_bovis_DSM_14045
LCVA_683	683	gi|1446048922|gb|RDY20343.1|	264	204	203	1.29e-78	58.128	Criibacterium bergeronii
LCVA_684	684	WP_074714834.1	315	302	315	1.29e-83	46.032	Lachnobacterium_bovis
LCVA_684	684	SDX83483.1	315	302	315	1.29e-83	46.032	Lachnobacterium_bovis_DSM_14045
LCVA_685	685	WP_074714837.1	173	175	174	2.53e-38	39.08	Lachnobacterium_bovis
LCVA_685	685	SDX83510.1	173	175	174	2.53e-38	39.08	Lachnobacterium_bovis_DSM_14045
LCVA_686	686	WP_074714840.1	330	325	325	2.22e-179	71.385	Lachnobacterium_bovis
LCVA_686	686	SDX83536.1	330	325	325	2.22e-179	71.385	Lachnobacterium_bovis_DSM_14045
LCVA_686	686	gi|1446050363|gb|RDY21731.1|	330	332	332	5.26e-99	42.169	Criibacterium bergeronii
LCVA_687	687	WP_074714842.1	391	385	401	1.07e-135	53.616	Lachnobacterium_bovis
LCVA_687	687	SDX83577.1	391	385	401	1.07e-135	53.616	Lachnobacterium_bovis_DSM_14045
LCVA_687	687	gi|985290921|gb|KWZ76302.1|	391	372	394	2.79e-98	40.863	Bacillus coagulans
LCVA_688	688	WP_074714844.1	120	120	120	1.58e-71	85	Lachnobacterium_bovis
LCVA_688	688	SDX83604.1	120	120	120	1.58e-71	85	Lachnobacterium_bovis_DSM_14045
LCVA_688	688	gi|1446050361|gb|RDY21729.1|	120	120	120	6.03e-65	77.5	Criibacterium bergeronii
LCVA_689	689	WP_159429305.1	125	122	118	1.26e-18	35.593	Lachnobacterium_bovis
LCVA_689	689	SDX83632.1	125	122	118	1.26e-18	35.593	Lachnobacterium_bovis_DSM_14045
LCVA_690	690	gi|985290918|gb|KWZ76299.1|	281	221	214	8.85e-90	61.682	Bacillus coagulans
LCVA_690	690	WP_074714849.1	281	300	301	4.67e-112	57.143	Lachnobacterium_bovis
LCVA_690	690	SDX83657.1	281	300	301	4.67e-112	57.143	Lachnobacterium_bovis_DSM_14045
LCVA_691	691	WP_074714852.1	89	93	89	5.77e-35	56.18	Lachnobacterium_bovis
LCVA_691	691	SDX83685.1	89	93	89	5.77e-35	56.18	Lachnobacterium_bovis_DSM_14045
LCVA_691	691	gi|1446050358|gb|RDY21726.1|	89	89	81	1.01e-15	40.741	Criibacterium bergeronii
LCVA_692	692	WP_074714855.1	261	261	260	3.03e-85	48.077	Lachnobacterium_bovis
LCVA_692	692	SDX83713.1	261	261	260	3.03e-85	48.077	Lachnobacterium_bovis_DSM_14045
LCVA_692	692	gi|1446050357|gb|RDY21725.1|	261	260	247	4.5e-41	36.032	Criibacterium bergeronii
LCVA_693	693	WP_083354392.1	379	399	366	3.61e-145	54.918	Lachnobacterium_bovis
LCVA_693	693	SDX83741.1	379	400	366	2.91e-145	54.918	Lachnobacterium_bovis_DSM_14045
LCVA_693	693	gi|985290914|gb|KWZ76295.1|	379	360	372	6.16e-100	42.473	Bacillus coagulans
LCVA_694	694	WP_074714858.1	686	680	680	0	73.382	Lachnobacterium_bovis
LCVA_694	694	SDX83768.1	686	680	680	0	73.382	Lachnobacterium_bovis_DSM_14045
LCVA_694	694	gi|1446050355|gb|RDY21723.1|	686	676	662	0	52.87	Criibacterium bergeronii
LCVA_695	695	WP_074714861.1	539	510	269	1.13e-101	55.019	Lachnobacterium_bovis
LCVA_695	695	SDX83796.1	539	510	269	1.13e-101	55.019	Lachnobacterium_bovis_DSM_14045
LCVA_696	696	WP_074714864.1	282	295	287	3.35e-86	53.31	Lachnobacterium_bovis
LCVA_696	696	SDX83825.1	282	295	287	3.35e-86	53.31	Lachnobacterium_bovis_DSM_14045
LCVA_696	696	gi|1446050353|gb|RDY21721.1|	282	294	260	8.15e-54	39.231	Criibacterium bergeronii
LCVA_697	697	WP_074714867.1	251	246	251	4.21e-18	25.498	Lachnobacterium_bovis
LCVA_697	697	SDX83853.1	251	246	251	4.21e-18	25.498	Lachnobacterium_bovis_DSM_14045
LCVA_698	698	WP_074714869.1	351	385	392	1.07e-67	35.969	Lachnobacterium_bovis
LCVA_698	698	SDX83881.1	351	385	392	1.07e-67	35.969	Lachnobacterium_bovis_DSM_14045
LCVA_698	698	gi|1446050351|gb|RDY21719.1|	351	363	354	1.53e-54	34.463	Criibacterium bergeronii
LCVA_699	699	WP_074714871.1	702	713	713	0	61.431	Lachnobacterium_bovis
LCVA_699	699	SDX83913.1	702	713	713	0	61.431	Lachnobacterium_bovis_DSM_14045
LCVA_699	699	gi|1446050350|gb|RDY21718.1|	702	705	716	0	44.553	Criibacterium bergeronii
LCVA_700	700	WP_074714873.1	155	164	157	2.24e-53	56.688	Lachnobacterium_bovis
LCVA_700	700	SDX83946.1	155	164	157	2.24e-53	56.688	Lachnobacterium_bovis_DSM_14045
LCVA_700	700	gi|1446050349|gb|RDY21717.1|	155	139	136	3.68e-29	37.5	Criibacterium bergeronii
LCVA_701	701	WP_074714876.1	204	206	201	4.68e-91	65.174	Lachnobacterium_bovis
LCVA_701	701	SDX83975.1	204	206	201	4.68e-91	65.174	Lachnobacterium_bovis_DSM_14045
LCVA_701	701	gi|1446050348|gb|RDY21716.1|	204	207	201	5.48e-47	38.806	Criibacterium bergeronii
LCVA_702	702	WP_074714879.1	162	161	162	6.16e-65	60.494	Lachnobacterium_bovis
LCVA_702	702	SDX84003.1	162	161	162	6.16e-65	60.494	Lachnobacterium_bovis_DSM_14045
LCVA_702	702	gi|1446050347|gb|RDY21715.1|	162	161	157	4.48e-45	49.045	Criibacterium bergeronii
LCVA_704	704	WP_074715343.1	253	253	250	1.42e-126	68.4	Lachnobacterium_bovis
LCVA_704	704	SDX84067.1	253	254	250	1.41e-126	68.4	Lachnobacterium_bovis_DSM_14045
LCVA_704	704	gi|1446050345|gb|RDY21713.1|	253	247	243	5.55e-66	46.502	Criibacterium bergeronii
LCVA_705	705	WP_074714885.1	532	532	526	2.26e-93	34.221	Lachnobacterium_bovis
LCVA_705	705	SDX84100.1	532	532	526	2.26e-93	34.221	Lachnobacterium_bovis_DSM_14045
LCVA_705	705	WP_074717557.1	532	466	405	4.37e-48	27.654	Lachnobacterium_bovis
LCVA_707	707	WP_074714890.1	291	230	289	1.02e-41	32.872	Lachnobacterium_bovis
LCVA_707	707	SDX84165.1	291	230	289	1.02e-41	32.872	Lachnobacterium_bovis_DSM_14045
LCVA_708	708	WP_074714893.1	200	170	203	2.24e-16	28.079	Lachnobacterium_bovis
LCVA_708	708	SDX84197.1	200	170	203	2.24e-16	28.079	Lachnobacterium_bovis_DSM_14045
LCVA_709	709	gi|987346915|gb|KXB59867.1|	239	261	229	4.49e-141	82.096	Lachnoanaerobaculum saburreum
LCVA_709	709	WP_074715684.1	239	242	239	2.35e-145	81.172	Lachnobacterium_bovis
LCVA_709	709	SDX94218.1	239	242	239	2.35e-145	81.172	Lachnobacterium_bovis_DSM_14045
LCVA_710	710	WP_045000354.1	311	309	301	5.52e-143	65.781	Shuttleworthia_satelles
LCVA_710	710	EEP28488.1	311	316	301	1.75e-142	65.781	Shuttleworthia_satelles
LCVA_710	710	WP_074715682.1	311	310	310	4.7e-141	63.226	Lachnobacterium_bovis
LCVA_711	711	gi|690760675|gb|KGF09101.1|	302	468	209	1.07e-40	39.713	Clostridiales bacterium S5-A14a
LCVA_712	712	WP_074715680.1	270	266	275	8.9e-79	51.273	Lachnobacterium_bovis
LCVA_712	712	SDX94157.1	270	266	275	8.9e-79	51.273	Lachnobacterium_bovis_DSM_14045
LCVA_713	713	EGG84705.1	230	231	229	4.5e-112	63.319	Lachnospiraceae_bacterium_2_1_46FAA
LCVA_713	713	WP_074715678.1	230	231	229	8.04e-109	62.009	Lachnobacterium_bovis
LCVA_713	713	SDX94123.1	230	231	229	8.04e-109	62.009	Lachnobacterium_bovis_DSM_14045
LCVA_714	714	WP_074715676.1	183	184	184	9.49e-94	71.739	Lachnobacterium_bovis
LCVA_714	714	SDX94089.1	183	184	184	9.49e-94	71.739	Lachnobacterium_bovis_DSM_14045
LCVA_714	714	EGG84706.1	183	183	183	3.48e-91	69.945	Lachnospiraceae_bacterium_2_1_46FAA
LCVA_715	715	WP_006906303.1	232	232	232	1.04e-95	56.466	Shuttleworthia_satelles
LCVA_715	715	EEP28485.1	232	232	232	1.04e-95	56.466	Shuttleworthia_satelles
LCVA_715	715	EGG84707.1	232	236	231	1.3e-94	56.277	Lachnospiraceae_bacterium_2_1_46FAA
LCVA_716	716	WP_074715672.1	270	266	263	8.2e-96	53.612	Lachnobacterium_bovis
LCVA_716	716	SDX94027.1	270	266	263	8.2e-96	53.612	Lachnobacterium_bovis_DSM_14045
LCVA_716	716	EEP28484.1	270	268	263	7.99e-90	52.091	Shuttleworthia_satelles
LCVA_717	717	WP_074715670.1	384	380	377	1.6e-147	54.111	Lachnobacterium_bovis
LCVA_717	717	SDX93994.1	384	380	377	1.6e-147	54.111	Lachnobacterium_bovis_DSM_14045
LCVA_717	717	WP_045000740.1	384	388	387	2.1e-145	52.713	Shuttleworthia_satelles
LCVA_718	718	WP_006906300.1	345	344	327	1.03e-119	51.07	Shuttleworthia_satelles
LCVA_718	718	EEP28482.1	345	344	327	1.03e-119	51.07	Shuttleworthia_satelles
LCVA_718	718	WP_074715668.1	345	349	348	8.76e-113	50	Lachnobacterium_bovis
LCVA_719	719	WP_074715666.1	357	351	346	0	73.699	Lachnobacterium_bovis
LCVA_719	719	SDX93934.1	357	351	346	0	73.699	Lachnobacterium_bovis_DSM_14045
LCVA_719	719	EGG79756.1	357	351	347	7.15e-180	72.622	Lachnospiraceae_bacterium_2_1_46FAA
LCVA_720	720	WP_006906298.1	1532	220	1462	0	62.019	Shuttleworthia_satelles
LCVA_720	720	EEP28480.1	1532	220	1462	0	62.019	Shuttleworthia_satelles
LCVA_720	720	EGG79757.1	1487	4	1462	0	53.831	Lachnospiraceae_bacterium_2_1_46FAA
LCVA_721	721	gi|985407653|gb|KXA69439.1|	97	89	82	3.73e-10	34.146	Megasphaera sp. MJR8396C
LCVA_721	721	gi|987379888|gb|KXB91299.1|	97	94	82	1.78e-10	34.146	Veillonellaceae bacterium DNF00751
LCVA_721	721	gi|987379435|gb|KXB90864.1|	97	84	77	2.9e-08	31.169	Veillonellaceae bacterium KA00182
LCVA_722	722	WP_074715655.1	273	278	275	3.06e-46	34.545	Lachnobacterium_bovis
LCVA_722	722	SDX93749.1	273	278	275	3.06e-46	34.545	Lachnobacterium_bovis_DSM_14045
LCVA_724	724	WP_074715653.1	164	164	156	1.02e-74	69.231	Lachnobacterium_bovis
LCVA_724	724	WP_044959106.1	164	164	156	2.02e-78	67.949	Shuttleworthia_satelles
LCVA_724	724	EEP28476.1	164	191	156	1.96e-77	67.949	Shuttleworthia_satelles
LCVA_725	725	WP_074715652.1	65	65	65	1.36e-28	76.923	Lachnobacterium_bovis
LCVA_725	725	SDX93692.1	65	65	65	1.36e-28	76.923	Lachnobacterium_bovis_DSM_14045
LCVA_725	725	EGG79351.1	65	65	65	2.32e-30	75.385	Lachnospiraceae_bacterium_2_1_46FAA
LCVA_726	726	gi|987339867|gb|KXB53167.1|	118	118	118	1.39e-62	78.814	Lachnoanaerobaculum saburreum
LCVA_726	726	WP_074715649.1	118	118	118	4.42e-60	70.339	Lachnobacterium_bovis
LCVA_726	726	SDX93663.1	118	118	118	4.42e-60	70.339	Lachnobacterium_bovis_DSM_14045
LCVA_727	727	WP_074715647.1	338	338	337	0	74.184	Lachnobacterium_bovis
LCVA_727	727	SDX93638.1	338	338	337	0	74.184	Lachnobacterium_bovis_DSM_14045
LCVA_727	727	EEP28473.1	338	343	337	0	71.81	Shuttleworthia_satelles
LCVA_729	729	WP_074715645.1	151	154	150	3.86e-47	50.667	Lachnobacterium_bovis
LCVA_729	729	SDX93606.1	151	154	150	3.86e-47	50.667	Lachnobacterium_bovis_DSM_14045
LCVA_729	729	EEP28454.1	151	157	151	2.04e-45	49.669	Shuttleworthia_satelles
LCVA_730	730	WP_074715643.1	402	398	345	5.53e-133	57.101	Lachnobacterium_bovis
LCVA_730	730	SDX93577.1	402	398	345	5.53e-133	57.101	Lachnobacterium_bovis_DSM_14045
LCVA_730	730	EGG84688.1	402	368	354	9.01e-135	55.085	Lachnospiraceae_bacterium_2_1_46FAA
LCVA_731	731	gi|987352329|gb|KXB65082.1|	89	89	82	7.21e-19	47.561	Peptoniphilus coxii
LCVA_731	731	gi|1001051554|gb|KXO16695.1|	89	92	91	2.62e-18	43.956	Clostridiales bacterium KA00134
LCVA_731	731	gi|1249065060|gb|PCN56362.1|	89	91	90	2.7e-16	40	Clostridioides difficile
LCVA_732	732	WP_143470198.1	99	99	97	1.7e-26	47.423	Lachnobacterium_bovis
LCVA_732	732	SDX93524.1	99	99	97	1.7e-26	47.423	Lachnobacterium_bovis_DSM_14045
LCVA_732	732	EEP28451.1	99	104	91	1.58e-23	39.56	Shuttleworthia_satelles
LCVA_733	733	gi|987347463|gb|KXB60394.1|	902	965	586	0	69.966	Lachnoanaerobaculum saburreum
LCVA_733	733	WP_074715639.1	902	930	609	0	69.458	Lachnobacterium_bovis
LCVA_733	733	SDX93495.1	902	930	609	0	69.458	Lachnobacterium_bovis_DSM_14045
LCVA_734	734	EGG84692.1	144	123	120	8.83e-51	64.167	Lachnospiraceae_bacterium_2_1_46FAA
LCVA_734	734	WP_006906267.1	144	125	123	7.28e-53	63.415	Shuttleworthia_satelles
LCVA_734	734	EEP28449.1	144	125	123	7.28e-53	63.415	Shuttleworthia_satelles
LCVA_735	735	EGG84693.1	314	315	304	4.66e-107	50.658	Lachnospiraceae_bacterium_2_1_46FAA
LCVA_735	735	WP_074715635.1	314	320	318	2.6e-109	49.686	Lachnobacterium_bovis
LCVA_735	735	SDX93444.1	314	320	318	2.6e-109	49.686	Lachnobacterium_bovis_DSM_14045
LCVA_736	736	EGG84694.1	309	303	315	7.19e-74	42.54	Lachnospiraceae_bacterium_2_1_46FAA
LCVA_736	736	WP_006906264.1	309	315	314	1.37e-71	39.809	Shuttleworthia_satelles
LCVA_736	736	EEP28447.1	309	315	314	1.37e-71	39.809	Shuttleworthia_satelles
LCVA_737	737	WP_074715631.1	303	306	300	2.26e-83	44	Lachnobacterium_bovis
LCVA_737	737	SDX93388.1	303	306	300	2.26e-83	44	Lachnobacterium_bovis_DSM_14045
LCVA_737	737	EEP28445.1	303	311	287	1.34e-76	41.463	Shuttleworthia_satelles
LCVA_738	738	gi|987343668|gb|KXB56846.1|	88	88	88	7.29e-45	78.409	Lachnoanaerobaculum saburreum
LCVA_738	738	WP_006906262.1	88	88	88	5.43e-48	78.409	Shuttleworthia_satelles
LCVA_738	738	EEP28444.1	88	88	88	5.43e-48	78.409	Shuttleworthia_satelles
LCVA_739	739	WP_074715627.1	695	698	695	0	77.698	Lachnobacterium_bovis
LCVA_739	739	SDX93330.1	695	698	695	0	77.698	Lachnobacterium_bovis_DSM_14045
LCVA_739	739	EEP28443.1	695	710	690	0	76.812	Shuttleworthia_satelles
LCVA_740	740	WP_083354395.1	247	309	246	6.32e-80	54.472	Lachnobacterium_bovis
LCVA_740	740	WP_006906259.1	247	253	246	3.46e-80	51.626	Shuttleworthia_satelles
LCVA_740	740	EEP28441.1	247	253	246	3.46e-80	51.626	Shuttleworthia_satelles
LCVA_741	741	WP_074715624.1	189	188	182	1.14e-79	62.088	Lachnobacterium_bovis
LCVA_741	741	SDX93245.1	189	188	182	1.14e-79	62.088	Lachnobacterium_bovis_DSM_14045
LCVA_741	741	EEP28440.1	189	190	176	1.01e-75	55.682	Shuttleworthia_satelles
LCVA_742	742	WP_074715609.1	300	309	295	3.3e-147	68.475	Lachnobacterium_bovis
LCVA_742	742	SDX93090.1	300	309	295	3.3e-147	68.475	Lachnobacterium_bovis_DSM_14045
LCVA_742	742	EGG84228.1	300	309	291	4.27e-137	63.23	Lachnospiraceae_bacterium_2_1_46FAA
LCVA_743	743	WP_074715606.1	425	435	437	7.25e-128	47.826	Lachnobacterium_bovis
LCVA_743	743	SDX93062.1	425	435	437	7.25e-128	47.826	Lachnobacterium_bovis_DSM_14045
LCVA_743	743	EGG84227.1	425	409	421	1.54e-128	47.031	Lachnospiraceae_bacterium_2_1_46FAA
LCVA_744	744	WP_006906247.1	217	222	214	6.41e-83	54.206	Shuttleworthia_satelles
LCVA_744	744	EEP28429.1	217	222	214	6.41e-83	54.206	Shuttleworthia_satelles
LCVA_744	744	EGG84226.1	217	218	211	3.26e-77	53.081	Lachnospiraceae_bacterium_2_1_46FAA
LCVA_745	745	WP_006906246.1	288	286	282	1.44e-119	58.156	Shuttleworthia_satelles
LCVA_745	745	EEP28428.1	288	286	282	1.44e-119	58.156	Shuttleworthia_satelles
LCVA_745	745	WP_074715600.1	288	284	283	5.79e-115	55.477	Lachnobacterium_bovis
LCVA_746	746	WP_044958960.1	363	371	349	0	70.774	Shuttleworthia_satelles
LCVA_746	746	EEP28427.1	363	368	345	0	70.725	Shuttleworthia_satelles
LCVA_746	746	gi|1331369620|gb|PNH21410.1|	363	378	355	0	68.451	Lachnospiraceae bacterium
LCVA_747	747	WP_074715594.1	262	256	256	3.58e-125	64.453	Lachnobacterium_bovis
LCVA_747	747	SDX92950.1	262	256	256	3.58e-125	64.453	Lachnobacterium_bovis_DSM_14045
LCVA_747	747	gi|1446049561|gb|RDY20940.1|	262	264	256	1.21e-94	53.516	Criibacterium bergeronii
LCVA_749	749	gi|985315233|gb|KWZ99606.1|	228	229	220	1.62e-40	38.636	Anaerococcus hydrogenalis
LCVA_749	749	gi|1249067229|gb|PCN58492.1|	228	227	225	3.05e-43	38.222	Clostridioides difficile
LCVA_749	749	gi|690780319|gb|KGF27382.1|	228	220	221	7.8e-41	37.104	Staphylococcus haemolyticus DNF00585
LCVA_750	750	WP_006906240.1	325	360	299	1.81e-65	35.452	Shuttleworthia_satelles
LCVA_750	750	EEP28422.1	325	360	299	1.81e-65	35.452	Shuttleworthia_satelles
LCVA_751	751	WP_074715557.1	481	474	463	0	63.931	Lachnobacterium_bovis
LCVA_751	751	SDX92557.1	481	474	463	0	63.931	Lachnobacterium_bovis_DSM_14045
LCVA_751	751	EEP28412.1	481	534	473	0	59.408	Shuttleworthia_satelles
LCVA_752	752	WP_006906227.1	205	199	204	4.56e-51	42.647	Shuttleworthia_satelles
LCVA_752	752	EEP28409.1	205	199	204	4.56e-51	42.647	Shuttleworthia_satelles
LCVA_752	752	EGG84212.1	205	201	205	4.43e-51	39.024	Lachnospiraceae_bacterium_2_1_46FAA
LCVA_753	753	WP_006906226.1	337	334	330	1.11e-173	70.909	Shuttleworthia_satelles
LCVA_753	753	EEP28408.1	337	334	330	1.11e-173	70.909	Shuttleworthia_satelles
LCVA_753	753	WP_074715546.1	337	335	330	2.2e-170	69.394	Lachnobacterium_bovis
LCVA_754	754	WP_074715543.1	146	139	139	2.84e-32	43.885	Lachnobacterium_bovis
LCVA_754	754	SDX92374.1	146	139	139	2.84e-32	43.885	Lachnobacterium_bovis_DSM_14045
LCVA_754	754	EGG84210.1	146	136	131	1.16e-30	40.458	Lachnospiraceae_bacterium_2_1_46FAA
LCVA_755	755	WP_074715540.1	732	740	762	4.77e-178	41.207	Lachnobacterium_bovis
LCVA_755	755	SDX92346.1	732	740	762	4.77e-178	41.207	Lachnobacterium_bovis_DSM_14045
LCVA_755	755	EEP28406.1	732	732	743	4.22e-172	37.147	Shuttleworthia_satelles
LCVA_756	756	WP_074715536.1	440	468	440	2.83e-122	43.182	Lachnobacterium_bovis
LCVA_756	756	SDX92321.1	440	468	440	2.83e-122	43.182	Lachnobacterium_bovis_DSM_14045
LCVA_756	756	EGG84208.1	440	486	427	1.5e-102	40.047	Lachnospiraceae_bacterium_2_1_46FAA
LCVA_757	757	WP_006906222.1	479	540	462	1.53e-131	43.074	Shuttleworthia_satelles
LCVA_757	757	EEP28404.1	479	540	462	1.53e-131	43.074	Shuttleworthia_satelles
LCVA_757	757	EGG84207.1	479	443	444	8.88e-124	42.793	Lachnospiraceae_bacterium_2_1_46FAA
LCVA_759	759	WP_074715527.1	119	146	121	3.18e-36	50.413	Lachnobacterium_bovis
LCVA_759	759	SDX92223.1	119	146	121	3.18e-36	50.413	Lachnobacterium_bovis_DSM_14045
LCVA_759	759	EGG84204.1	119	133	119	5.66e-39	47.899	Lachnospiraceae_bacterium_2_1_46FAA
LCVA_760	760	WP_083790727.1	61	61	61	1.28e-31	80.328	Shuttleworthia_satelles
LCVA_760	760	WP_074715524.1	61	61	61	3.76e-28	72.131	Lachnobacterium_bovis
LCVA_760	760	SDX92202.1	61	61	61	3.76e-28	72.131	Lachnobacterium_bovis_DSM_14045
LCVA_761	761	WP_074715521.1	119	119	119	4.81e-61	72.269	Lachnobacterium_bovis
LCVA_761	761	SDX92177.1	119	119	119	4.81e-61	72.269	Lachnobacterium_bovis_DSM_14045
LCVA_761	761	EGG84201.1	119	119	119	7.88e-57	69.748	Lachnospiraceae_bacterium_2_1_46FAA
LCVA_762	762	WP_074715518.1	574	555	572	6.01e-179	48.776	Lachnobacterium_bovis
LCVA_762	762	SDX92152.1	574	555	572	6.01e-179	48.776	Lachnobacterium_bovis_DSM_14045
LCVA_762	762	EGG84200.1	574	552	572	2.62e-174	48.077	Lachnospiraceae_bacterium_2_1_46FAA
LCVA_763	763	gi|1331369478|gb|PNH21268.1|	687	673	642	0	43.769	Lachnospiraceae bacterium
LCVA_763	763	WP_074715516.1	687	686	676	0	43.195	Lachnobacterium_bovis
LCVA_763	763	WP_006906212.1	687	683	679	0	42.563	Shuttleworthia_satelles
LCVA_763	763	EEP28394.1	687	683	679	0	42.563	Shuttleworthia_satelles
LCVA_764	764	EGG85058.1	583	577	578	5.55e-178	46.54	Lachnospiraceae_bacterium_2_1_46FAA
LCVA_764	764	WP_074715513.1	583	581	582	2.17e-167	45.876	Lachnobacterium_bovis
LCVA_764	764	WP_045000332.1	583	581	574	6.55e-176	45.645	Shuttleworthia_satelles
LCVA_765	765	EGG85059.1	292	292	292	5.72e-78	44.178	Lachnospiraceae_bacterium_2_1_46FAA
LCVA_765	765	WP_074715510.1	292	294	294	7.38e-77	41.837	Lachnobacterium_bovis
LCVA_765	765	SDX92078.1	292	294	294	7.38e-77	41.837	Lachnobacterium_bovis_DSM_14045
LCVA_766	766	gi|985383545|gb|KXA64718.1|	84	89	79	5.78e-27	50.633	Veillonella atypica
LCVA_766	766	gi|987372783|gb|KXB84490.1|	84	89	77	1.7e-25	49.351	Veillonella dispar
LCVA_766	766	gi|987371247|gb|KXB83014.1|	84	89	78	1.35e-25	48.718	Mycoplasma_canis_UF33
LCVA_767	767	WP_006906209.1	212	214	208	1.58e-96	63.942	Shuttleworthia_satelles
LCVA_767	767	EEP28391.1	212	214	208	1.58e-96	63.942	Shuttleworthia_satelles
LCVA_767	767	EGG85060.1	212	210	211	5.88e-86	61.137	Lachnospiraceae_bacterium_2_1_46FAA
LCVA_768	768	WP_074715501.1	113	112	80	5.5e-31	63.75	Lachnobacterium_bovis
LCVA_768	768	SDX92006.1	113	112	80	5.5e-31	63.75	Lachnobacterium_bovis_DSM_14045
LCVA_768	768	EGG85061.1	113	80	77	8.26e-30	58.442	Lachnospiraceae_bacterium_2_1_46FAA
LCVA_769	769	WP_074715499.1	439	440	440	1.57e-169	53.864	Lachnobacterium_bovis
LCVA_769	769	SDX91984.1	439	440	440	1.57e-169	53.864	Lachnobacterium_bovis_DSM_14045
LCVA_769	769	gi|1331369486|gb|PNH21276.1|	439	440	441	5.44e-164	50.794	Lachnospiraceae bacterium
LCVA_770	770	WP_006906206.1	180	180	180	4.57e-76	62.778	Shuttleworthia_satelles
LCVA_770	770	EEP28388.1	180	180	180	4.57e-76	62.778	Shuttleworthia_satelles
LCVA_770	770	WP_074715496.1	180	187	187	2.39e-73	62.032	Lachnobacterium_bovis
LCVA_771	771	WP_074715490.1	185	183	183	3.43e-60	50.82	Lachnobacterium_bovis
LCVA_771	771	SDX91910.1	185	183	183	3.43e-60	50.82	Lachnobacterium_bovis_DSM_14045
LCVA_771	771	EGG84182.1	185	189	183	1.44e-59	49.18	Lachnospiraceae_bacterium_2_1_46FAA
LCVA_772	772	WP_074715487.1	167	160	160	1.58e-74	61.875	Lachnobacterium_bovis
LCVA_772	772	SDX91886.1	167	160	160	1.58e-74	61.875	Lachnobacterium_bovis_DSM_14045
LCVA_772	772	EGG84181.1	167	158	158	2.07e-73	61.392	Lachnospiraceae_bacterium_2_1_46FAA
LCVA_773	773	WP_006906202.1	245	237	190	7.4e-59	47.895	Shuttleworthia_satelles
LCVA_773	773	EEP28384.1	245	237	190	7.4e-59	47.895	Shuttleworthia_satelles
LCVA_773	773	WP_074715485.1	245	201	179	1.07e-50	44.693	Lachnobacterium_bovis
LCVA_774	774	gi|987342371|gb|KXB55584.1|	224	214	213	1.7e-53	42.254	Lachnoanaerobaculum saburreum
LCVA_774	774	EEP28383.1	224	224	205	1.99e-57	41.951	Shuttleworthia_satelles
LCVA_774	774	WP_045000707.1	224	208	199	1.15e-53	40.704	Shuttleworthia_satelles
LCVA_775	775	EGG84170.1	331	320	334	6.91e-77	43.114	Lachnospiraceae_bacterium_2_1_46FAA
LCVA_775	775	WP_074715760.1	331	329	335	2.64e-74	40.896	Lachnobacterium_bovis
LCVA_775	775	SDX91746.1	331	340	335	3.5e-74	40.896	Lachnobacterium_bovis_DSM_14045
LCVA_776	776	WP_074715470.1	178	176	176	2.59e-88	66.477	Lachnobacterium_bovis
LCVA_776	776	WP_006906199.1	178	176	176	3.81e-91	65.341	Shuttleworthia_satelles
LCVA_776	776	EEP28381.1	178	176	176	3.81e-91	65.341	Shuttleworthia_satelles
LCVA_777	777	EGG84856.1	414	378	394	8.25e-52	32.995	Lachnospiraceae_bacterium_2_1_46FAA
LCVA_777	777	WP_074715446.1	414	390	397	2.55e-47	31.486	Lachnobacterium_bovis
LCVA_777	777	SDX91542.1	414	390	397	2.55e-47	31.486	Lachnobacterium_bovis_DSM_14045
LCVA_778	778	WP_022748121.1	102	102	102	4.48e-49	72.549	Lachnobacterium_bovis
LCVA_778	778	SDX91515.1	102	102	102	4.48e-49	72.549	Lachnobacterium_bovis_DSM_14045
LCVA_778	778	EEP28366.1	102	102	100	9.25e-46	69	Shuttleworthia_satelles
LCVA_779	779	WP_006906183.1	109	107	109	2.64e-24	38.532	Shuttleworthia_satelles
LCVA_779	779	EEP28365.1	109	107	109	2.64e-24	38.532	Shuttleworthia_satelles
LCVA_779	779	EGG84861.1	109	110	111	1.14e-21	37.838	Lachnospiraceae_bacterium_2_1_46FAA
LCVA_780	780	WP_006906182.1	94	96	94	2.2e-57	88.298	Shuttleworthia_satelles
LCVA_780	780	EEP28364.1	94	96	94	2.2e-57	88.298	Shuttleworthia_satelles
LCVA_780	780	EGG84862.1	94	94	94	2.42e-56	85.106	Lachnospiraceae_bacterium_2_1_46FAA
LCVA_781	781	WP_074715438.1	427	427	427	0	64.871	Lachnobacterium_bovis
LCVA_781	781	SDX91436.1	427	427	427	0	64.871	Lachnobacterium_bovis_DSM_14045
LCVA_781	781	WP_045000327.1	427	428	428	5.76e-170	63.551	Shuttleworthia_satelles
LCVA_782	782	WP_045000704.1	104	95	95	6.43e-39	60	Shuttleworthia_satelles
LCVA_782	782	EEP28362.1	104	98	97	1.36e-39	59.794	Shuttleworthia_satelles
LCVA_782	782	WP_074715436.1	104	96	96	5.42e-37	59.375	Lachnobacterium_bovis
LCVA_783	783	WP_006906179.1	401	482	254	1.47e-61	40.157	Shuttleworthia_satelles
LCVA_783	783	EEP28361.1	401	482	254	1.47e-61	40.157	Shuttleworthia_satelles
LCVA_784	784	EGG84867.1	110	117	99	3.25e-29	50.505	Lachnospiraceae_bacterium_2_1_46FAA
LCVA_784	784	WP_074715428.1	110	112	106	2.78e-34	49.057	Lachnobacterium_bovis
LCVA_784	784	SDX91340.1	110	112	106	2.78e-34	49.057	Lachnobacterium_bovis_DSM_14045
LCVA_785	785	WP_006906175.1	206	204	204	5.27e-106	69.118	Shuttleworthia_satelles
LCVA_785	785	EEP28357.1	206	204	204	5.27e-106	69.118	Shuttleworthia_satelles
LCVA_785	785	EGG84869.1	206	205	205	5.33e-97	65.366	Lachnospiraceae_bacterium_2_1_46FAA
LCVA_787	787	EGG84870.1	112	121	60	1.34e-07	36.667	Lachnospiraceae_bacterium_2_1_46FAA
LCVA_787	787	WP_006906174.1	112	135	86	1.78e-11	32.558	Shuttleworthia_satelles
LCVA_787	787	EEP28356.1	112	135	86	1.78e-11	32.558	Shuttleworthia_satelles
LCVA_788	788	WP_006906173.1	360	360	357	8.33e-168	63.305	Shuttleworthia_satelles
LCVA_788	788	EEP28355.1	360	360	357	8.33e-168	63.305	Shuttleworthia_satelles
LCVA_788	788	EGG84871.1	360	353	350	4.35e-110	47.714	Lachnospiraceae_bacterium_2_1_46FAA
LCVA_789	789	WP_074715120.1	379	312	304	2.21e-124	60.197	Lachnobacterium_bovis
LCVA_789	789	SDX86364.1	379	312	304	2.21e-124	60.197	Lachnobacterium_bovis_DSM_14045
LCVA_789	789	EGG84875.1	379	307	304	1.77e-122	58.553	Lachnospiraceae_bacterium_2_1_46FAA
LCVA_790	790	WP_045000699.1	173	180	147	8.62e-28	40.816	Shuttleworthia_satelles
LCVA_790	790	EEP28353.1	173	189	147	1.32e-27	40.816	Shuttleworthia_satelles
LCVA_790	790	EGG84876.1	173	175	161	1.03e-32	37.888	Lachnospiraceae_bacterium_2_1_46FAA
LCVA_791	791	gi|987340215|gb|KXB53512.1|	361	362	327	3.09e-87	42.202	Lachnoanaerobaculum saburreum
LCVA_791	791	WP_006906170.1	361	368	352	9.04e-91	40.057	Shuttleworthia_satelles
LCVA_791	791	EEP28352.1	361	368	352	9.04e-91	40.057	Shuttleworthia_satelles
LCVA_792	792	EGG84878.1	210	181	112	1.78e-44	58.036	Lachnospiraceae_bacterium_2_1_46FAA
LCVA_792	792	WP_006906169.1	210	170	143	1.76e-41	44.755	Shuttleworthia_satelles
LCVA_792	792	EEP28351.1	210	170	143	1.76e-41	44.755	Shuttleworthia_satelles
LCVA_793	793	WP_156784483.1	458	455	456	2.43e-107	34.43	Shuttleworthia_satelles
LCVA_793	793	EEP28349.1	458	477	456	4.63e-107	34.43	Shuttleworthia_satelles
LCVA_793	793	WP_143470194.1	458	459	450	2.27e-72	30.889	Lachnobacterium_bovis
LCVA_794	794	gi|1331369444|gb|PNH21234.1|	140	139	140	4.67e-40	45.714	Lachnospiraceae bacterium
LCVA_794	794	gi|987340210|gb|KXB53507.1|	140	139	140	5.92e-42	45.714	Lachnoanaerobaculum saburreum
LCVA_794	794	WP_074715134.1	140	140	140	6.89e-38	42.143	Lachnobacterium_bovis
LCVA_794	794	SDX86511.1	140	140	140	6.89e-38	42.143	Lachnobacterium_bovis_DSM_14045
LCVA_795	795	WP_083790726.1	312	341	245	1.88e-65	41.633	Shuttleworthia_satelles
LCVA_795	795	EEP28346.1	312	334	245	1.76e-65	41.633	Shuttleworthia_satelles
LCVA_795	795	EGG84883.1	312	321	273	1.03e-62	41.026	Lachnospiraceae_bacterium_2_1_46FAA
LCVA_796	796	WP_006906163.1	131	131	131	1.23e-77	77.863	Shuttleworthia_satelles
LCVA_796	796	EEP28345.1	131	131	131	1.23e-77	77.863	Shuttleworthia_satelles
LCVA_796	796	WP_022747824.1	131	131	130	1.4e-77	77.692	Lachnobacterium_bovis
LCVA_797	797	WP_006906162.1	372	379	372	2.99e-140	52.957	Shuttleworthia_satelles
LCVA_797	797	EEP28344.1	372	379	372	2.99e-140	52.957	Shuttleworthia_satelles
LCVA_797	797	WP_074715136.1	372	370	368	5.59e-120	50	Lachnobacterium_bovis
LCVA_798	798	WP_156784482.1	225	296	196	8.74e-31	31.122	Shuttleworthia_satelles
LCVA_798	798	EEP28343.1	225	258	196	2.23e-31	31.122	Shuttleworthia_satelles
LCVA_798	798	EGG84888.1	225	229	180	4.11e-19	28.333	Lachnospiraceae_bacterium_2_1_46FAA
LCVA_799	799	WP_006906160.1	946	951	935	0	46.631	Shuttleworthia_satelles
LCVA_799	799	EEP28342.1	946	951	935	0	46.631	Shuttleworthia_satelles
LCVA_799	799	WP_074715139.1	946	933	948	0	46.624	Lachnobacterium_bovis
LCVA_800	800	WP_006906159.1	177	178	159	1.16e-41	40.881	Shuttleworthia_satelles
LCVA_800	800	EEP28341.1	177	178	159	1.16e-41	40.881	Shuttleworthia_satelles
LCVA_800	800	EGG84890.1	177	176	168	5.73e-35	36.31	Lachnospiraceae_bacterium_2_1_46FAA
LCVA_801	801	WP_074715145.1	284	306	282	3.21e-85	47.518	Lachnobacterium_bovis
LCVA_801	801	SDX86662.1	284	306	282	3.21e-85	47.518	Lachnobacterium_bovis_DSM_14045
LCVA_801	801	EEP28340.1	284	286	284	1.1e-87	44.366	Shuttleworthia_satelles
LCVA_802	802	WP_006906157.1	339	337	336	1.46e-155	60.417	Shuttleworthia_satelles
LCVA_802	802	EEP28339.1	339	337	336	1.46e-155	60.417	Shuttleworthia_satelles
LCVA_802	802	WP_074715148.1	339	337	337	4.88e-130	53.709	Lachnobacterium_bovis
LCVA_803	803	EGG84893.1	232	231	214	1.24e-39	36.449	Lachnospiraceae_bacterium_2_1_46FAA
LCVA_803	803	WP_083354387.1	232	230	212	4.9e-40	32.075	Lachnobacterium_bovis
LCVA_803	803	SDX86712.1	232	229	212	4.62e-40	32.075	Lachnobacterium_bovis_DSM_14045
LCVA_804	804	WP_074715155.1	425	432	424	0	68.868	Lachnobacterium_bovis
LCVA_804	804	WP_045000694.1	425	428	425	0	67.529	Shuttleworthia_satelles
LCVA_804	804	EEP28337.1	425	431	425	0	67.529	Shuttleworthia_satelles
LCVA_805	805	WP_074715158.1	311	317	311	2.69e-102	51.447	Lachnobacterium_bovis
LCVA_805	805	SDX86769.1	311	317	311	2.69e-102	51.447	Lachnobacterium_bovis_DSM_14045
LCVA_805	805	EGG84897.1	311	317	310	5.89e-102	48.71	Lachnospiraceae_bacterium_2_1_46FAA
LCVA_806	806	WP_006906153.1	659	654	670	0	47.612	Shuttleworthia_satelles
LCVA_806	806	EEP28335.1	659	654	670	0	47.612	Shuttleworthia_satelles
LCVA_806	806	WP_074715161.1	659	690	705	0	42.695	Lachnobacterium_bovis
LCVA_807	807	EGG84899.1	876	883	877	0	56.556	Lachnospiraceae_bacterium_2_1_46FAA
LCVA_807	807	WP_156784516.1	876	876	877	0	56.556	Shuttleworthia_satelles
LCVA_807	807	EEP28334.1	876	895	877	0	56.556	Shuttleworthia_satelles
LCVA_809	809	WP_074715164.1	540	528	529	0	54.064	Lachnobacterium_bovis
LCVA_809	809	SDX86851.1	540	528	529	0	54.064	Lachnobacterium_bovis_DSM_14045
LCVA_809	809	gi|1331369434|gb|PNH21224.1|	540	542	526	0	49.43	Lachnospiraceae bacterium
LCVA_810	810	gi|985327688|gb|KXA11495.1|	413	407	413	2.54e-62	34.14	Finegoldia magna
LCVA_810	810	EGG84895.1	413	412	412	1.57e-69	33.981	Lachnospiraceae_bacterium_2_1_46FAA
LCVA_810	810	gi|1331369432|gb|PNH21222.1|	413	405	407	2.98e-63	32.187	Lachnospiraceae bacterium
LCVA_811	811	WP_006906149.1	550	555	548	1.44e-174	49.818	Shuttleworthia_satelles
LCVA_811	811	EEP28331.1	550	555	548	1.44e-174	49.818	Shuttleworthia_satelles
LCVA_811	811	WP_074715170.1	550	553	553	1.37e-163	46.474	Lachnobacterium_bovis
LCVA_812	812	gi|690790355|gb|KGF36817.1|	353	371	351	1.69e-57	36.752	Peptoniphilus lacrimalis DNF00528
LCVA_812	812	WP_074715173.1	353	362	360	7.5e-76	36.667	Lachnobacterium_bovis
LCVA_812	812	SDX86941.1	353	362	360	7.5e-76	36.667	Lachnobacterium_bovis_DSM_14045
LCVA_813	813	gi|1331369430|gb|PNH21220.1|	164	163	163	1.66e-52	49.693	Lachnospiraceae bacterium
LCVA_813	813	WP_006906148.1	164	164	164	4.86e-49	46.951	Shuttleworthia_satelles
LCVA_813	813	EEP28330.1	164	164	164	4.86e-49	46.951	Shuttleworthia_satelles
LCVA_814	814	WP_074715181.1	409	391	297	4.04e-33	30.64	Lachnobacterium_bovis
LCVA_814	814	SDX87001.1	409	391	297	4.04e-33	30.64	Lachnobacterium_bovis_DSM_14045
LCVA_815	815	WP_006906147.1	332	344	322	1.76e-154	65.528	Shuttleworthia_satelles
LCVA_815	815	EEP28329.1	332	344	322	1.76e-154	65.528	Shuttleworthia_satelles
LCVA_815	815	EGG84909.1	332	328	327	4.14e-151	65.443	Lachnospiraceae_bacterium_2_1_46FAA
LCVA_816	816	WP_074715201.1	380	381	380	5.15e-50	33.421	Lachnobacterium_bovis
LCVA_816	816	SDX87228.1	380	381	380	5.15e-50	33.421	Lachnobacterium_bovis_DSM_14045
LCVA_816	816	EGG84836.1	380	376	385	4.3e-32	27.792	Lachnospiraceae_bacterium_2_1_46FAA
LCVA_817	817	WP_074715203.1	289	280	278	5.75e-108	56.115	Lachnobacterium_bovis
LCVA_817	817	SDX87252.1	289	280	278	5.75e-108	56.115	Lachnobacterium_bovis_DSM_14045
LCVA_817	817	gi|985294490|gb|KWZ79587.1|	289	283	278	6.5e-107	53.597	Bacillus coagulans
LCVA_818	818	WP_074715206.1	561	556	561	0	63.636	Lachnobacterium_bovis
LCVA_818	818	SDX87289.1	561	556	561	0	63.636	Lachnobacterium_bovis_DSM_14045
LCVA_818	818	gi|987341659|gb|KXB54910.1|	561	556	561	0	61.141	Lachnoanaerobaculum saburreum
[truncated: 1,824 more rows]
